# Supplementary material
Source: PubMed Central journal article supplement (PMC2777545)

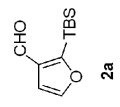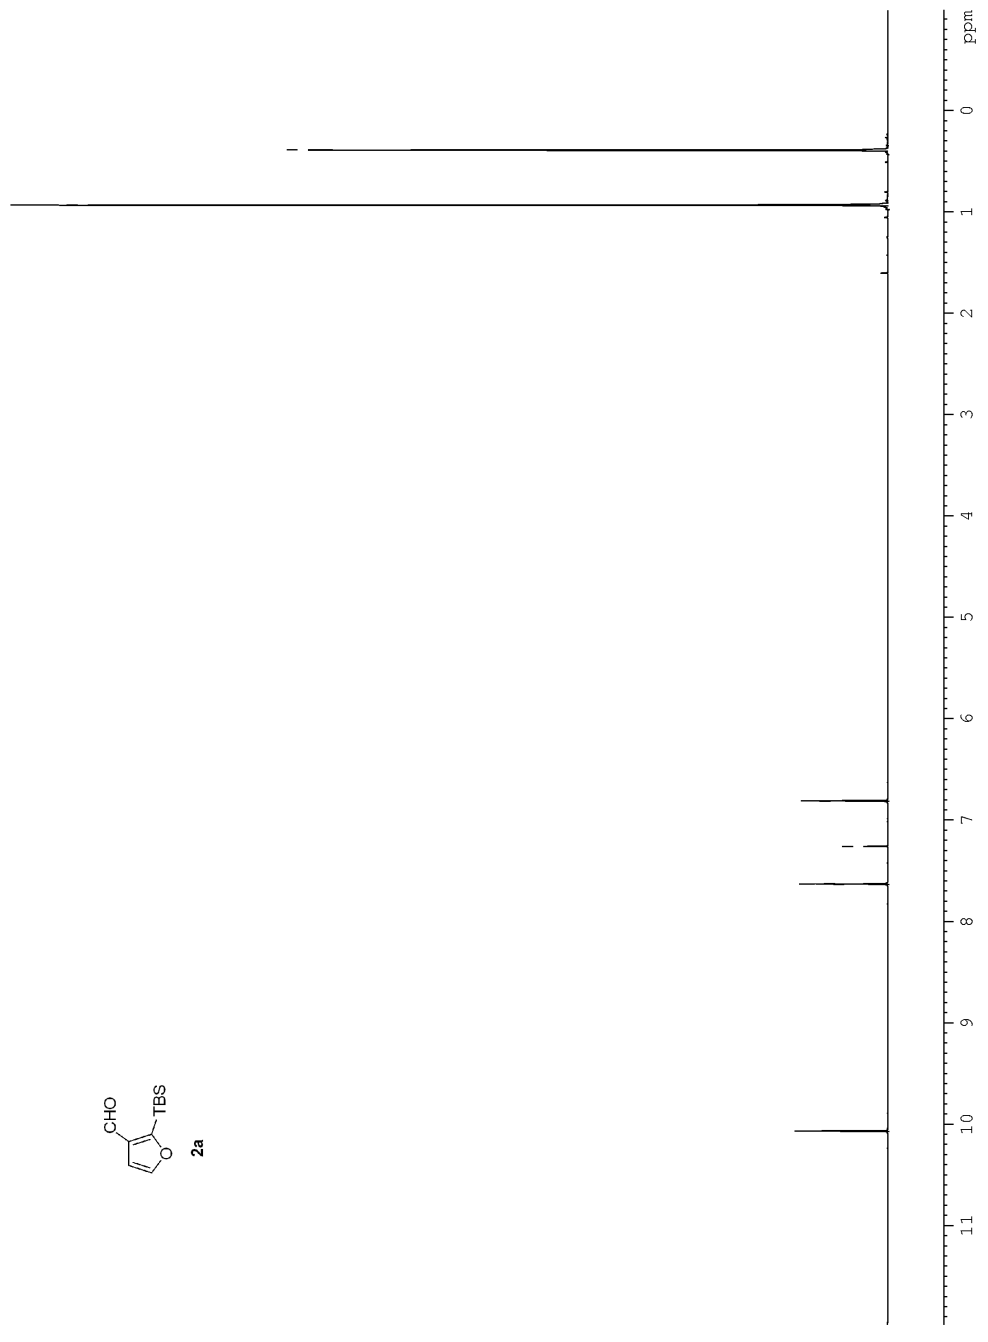

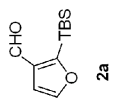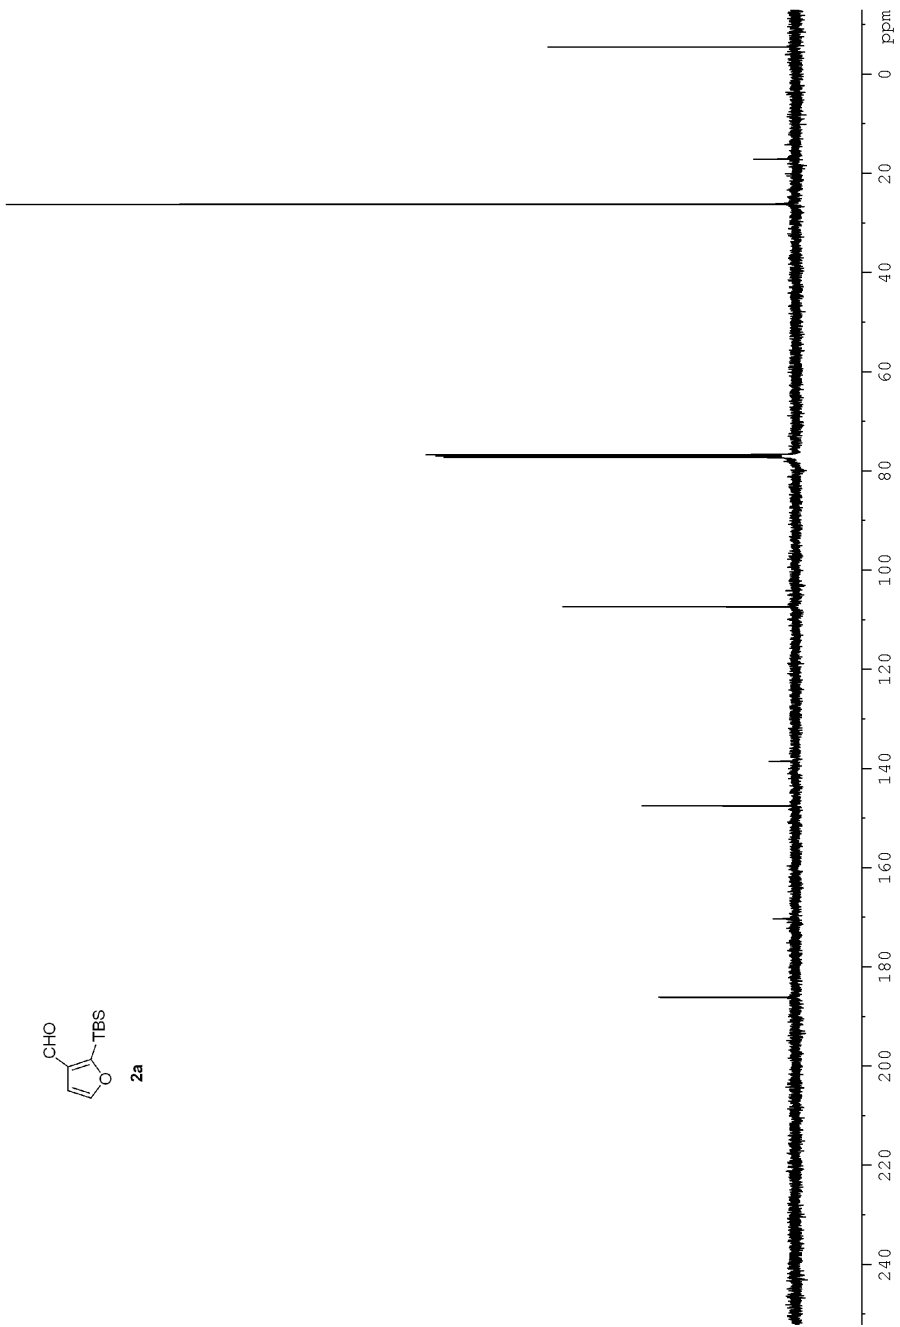

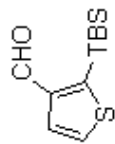

**2b**

<sup>1</sup>H NMR, 300 MHz, CDCl<sub>3</sub>

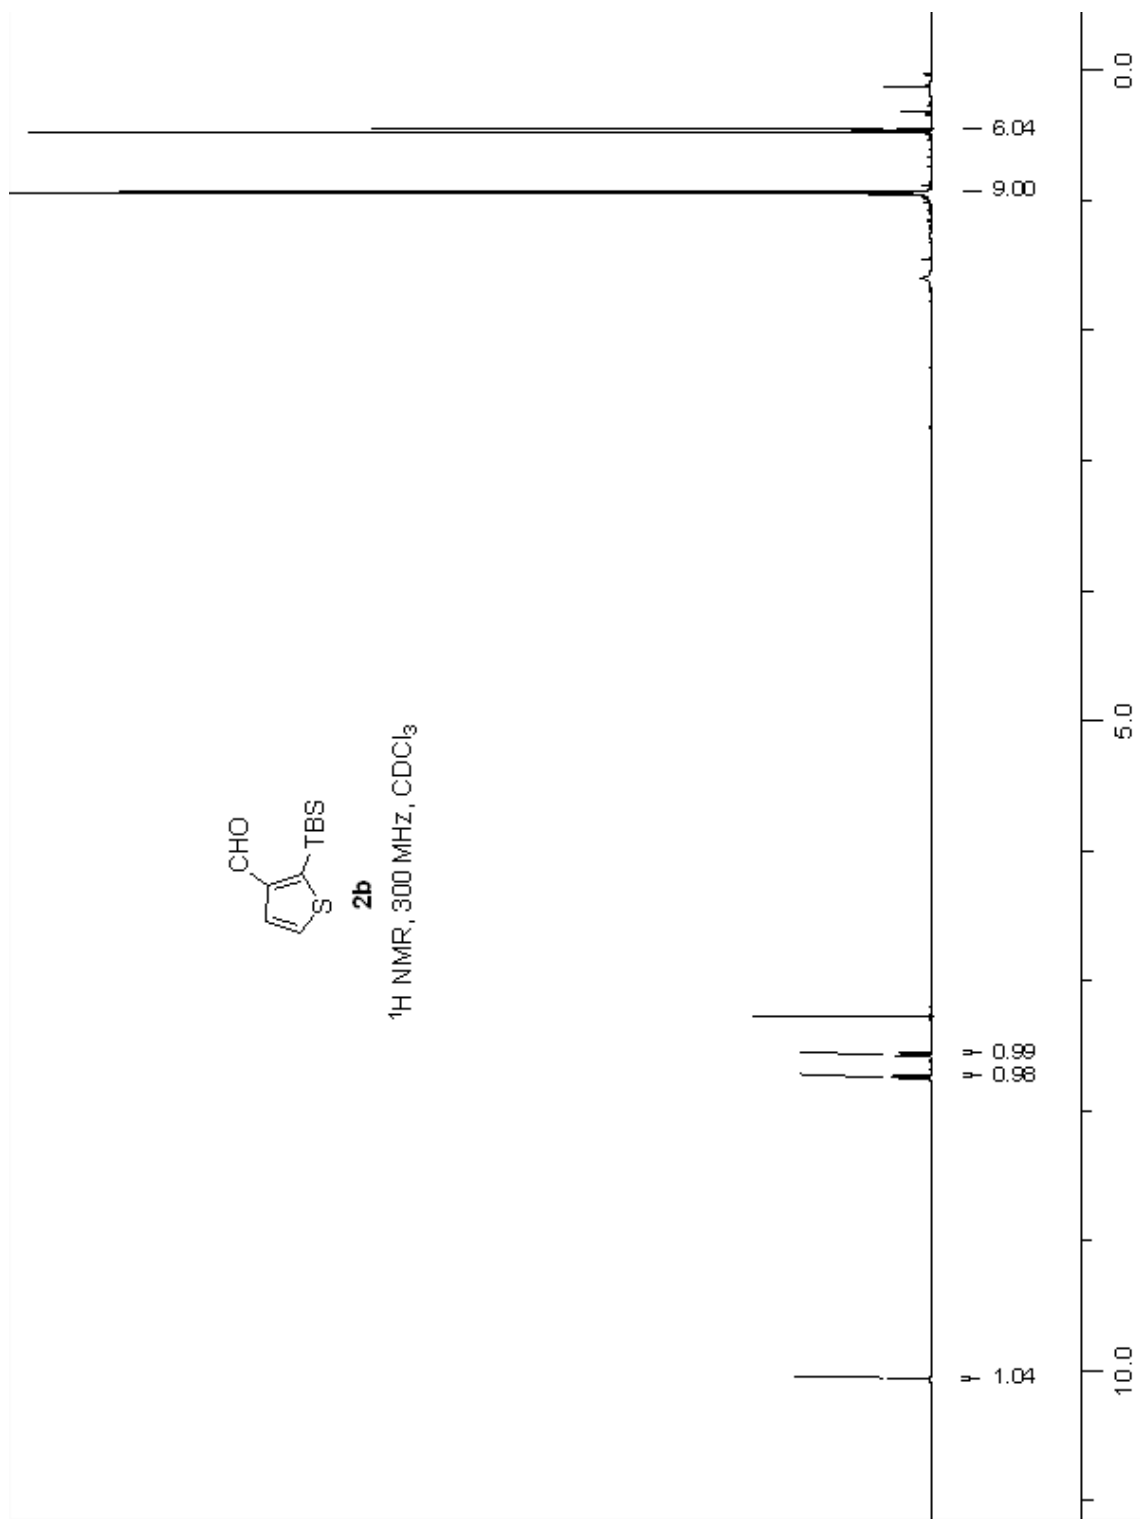

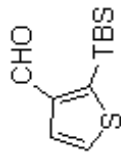

**2b**

$^{13}\text{C}$  NMR, 75 MHz,  $\text{CDCl}_3$

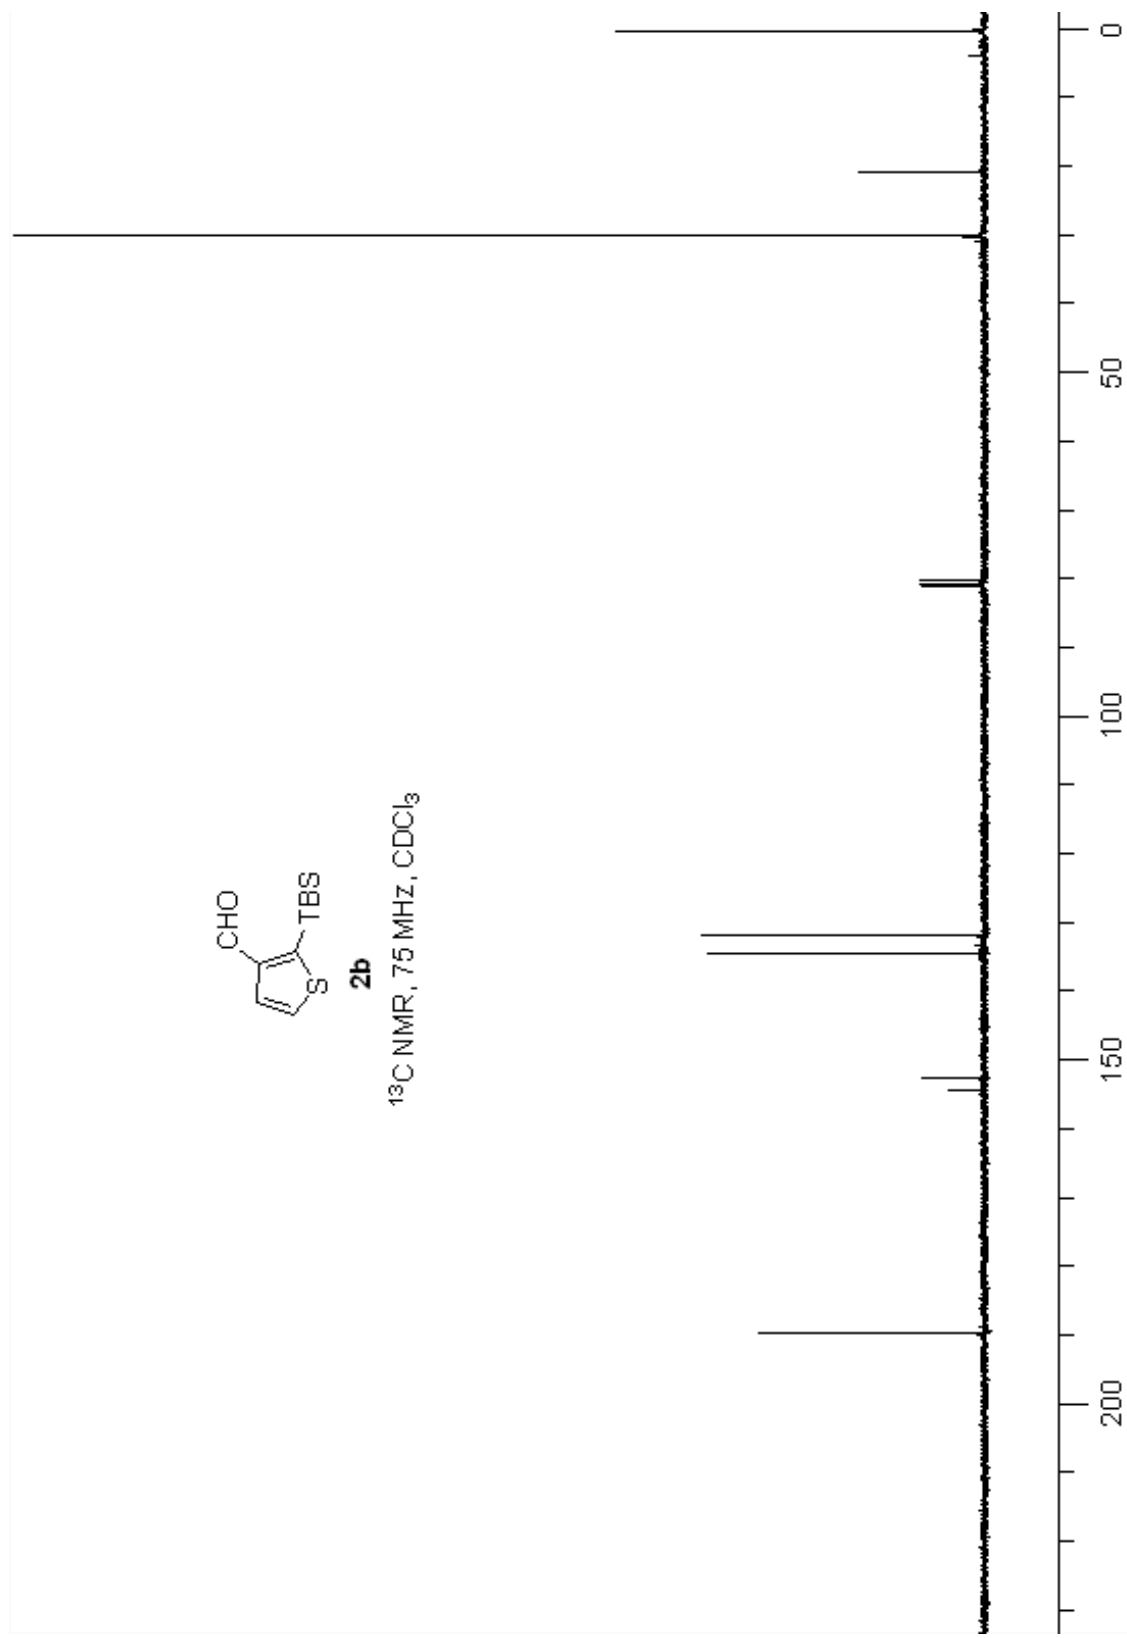

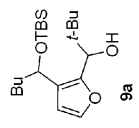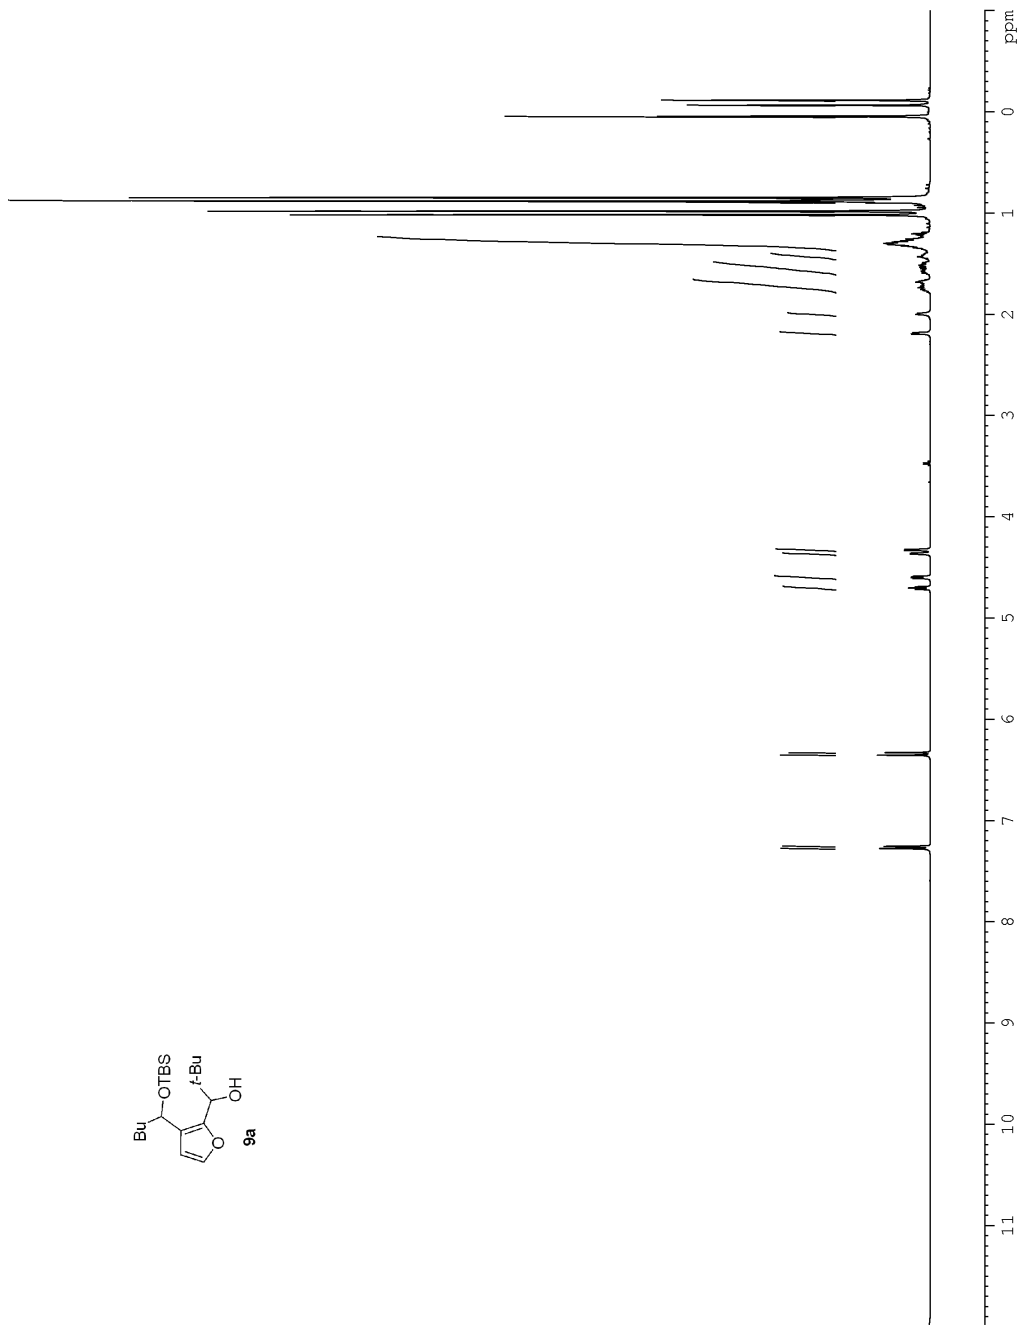

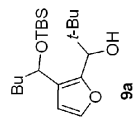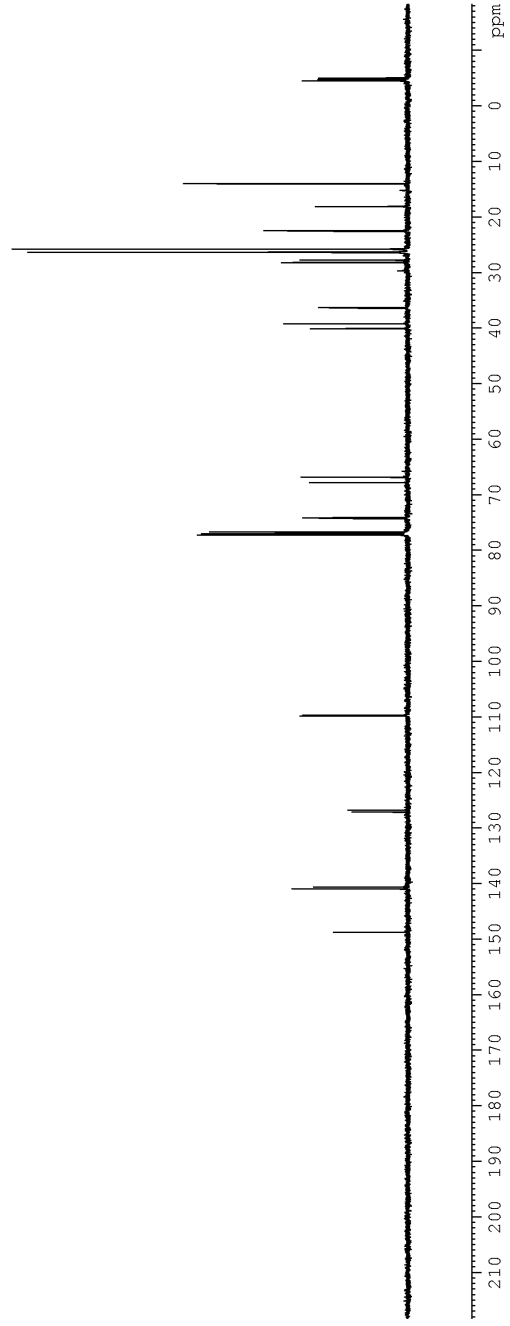

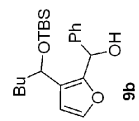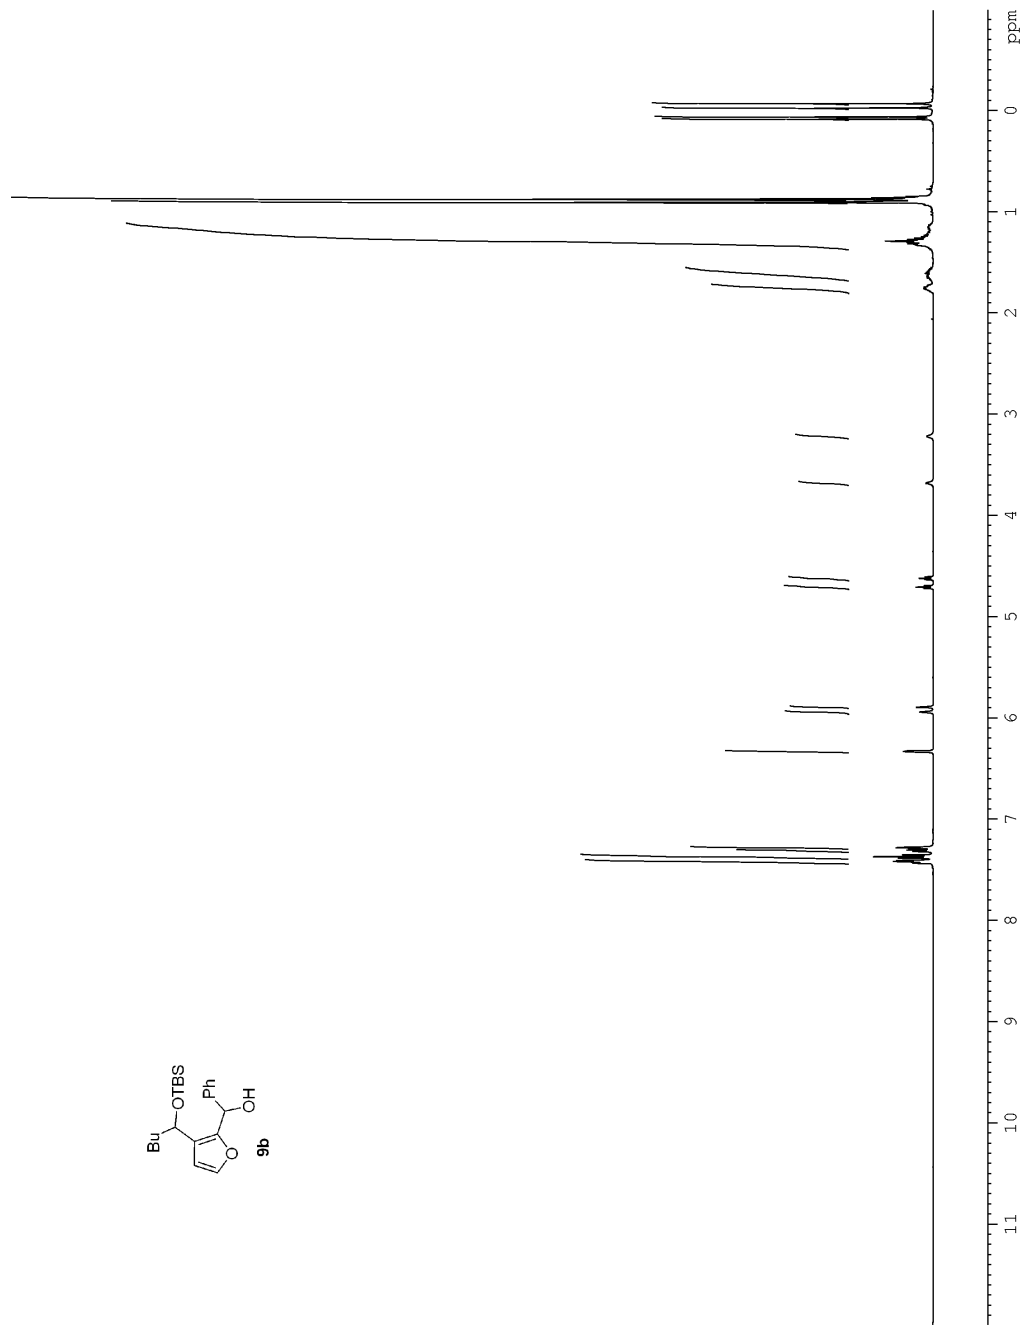

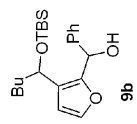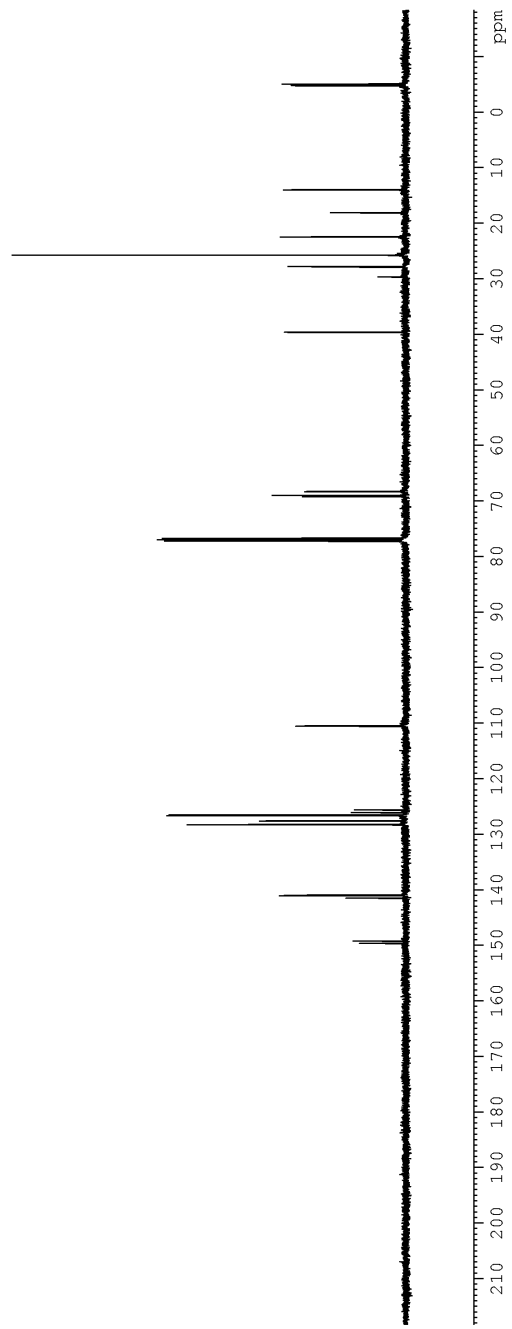



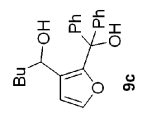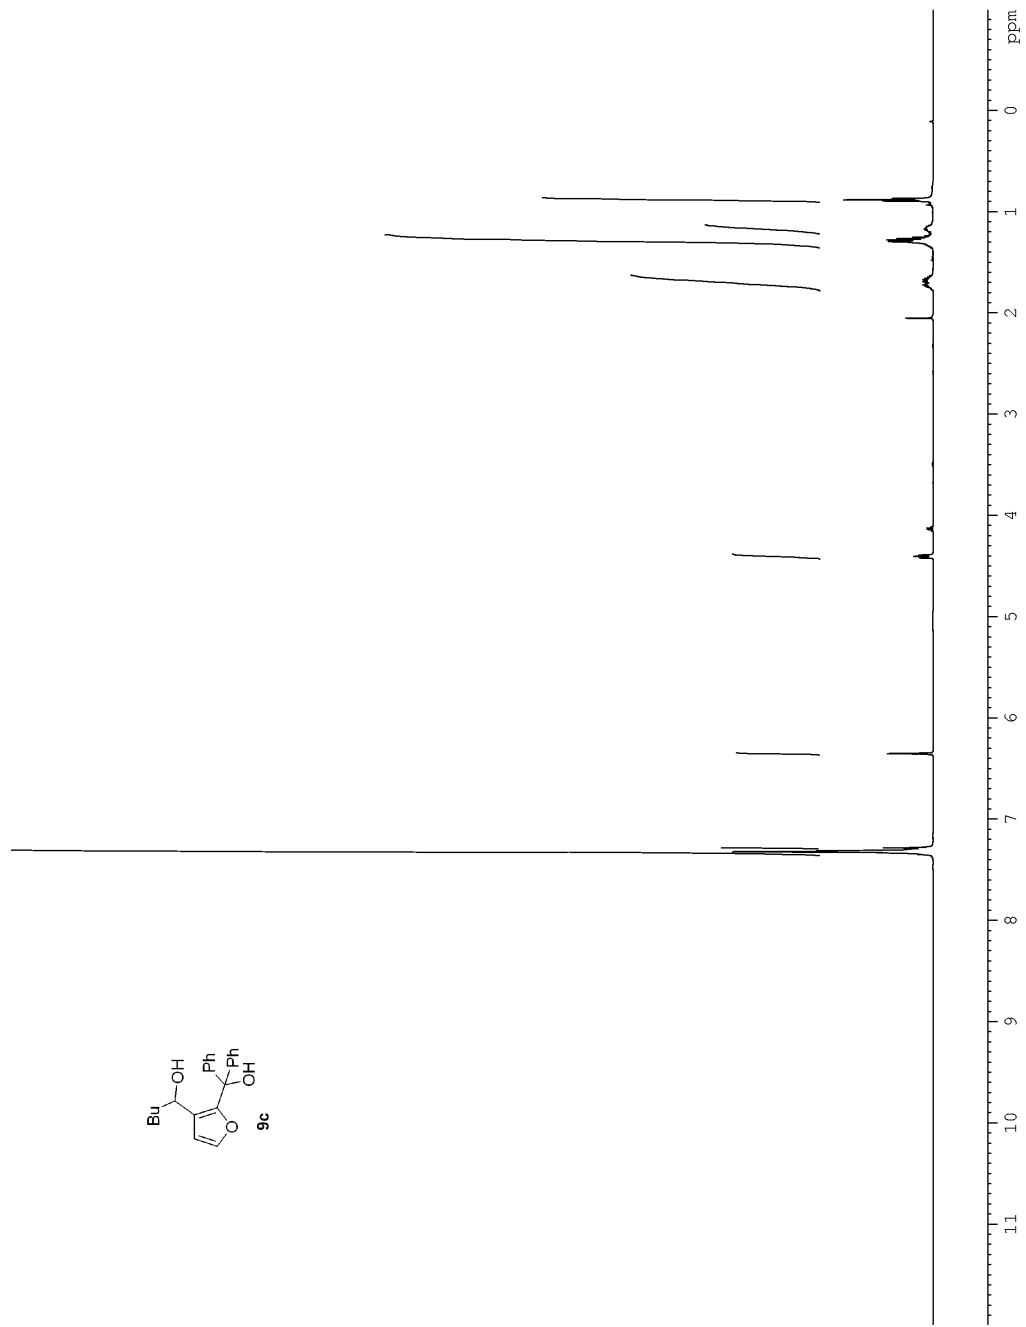

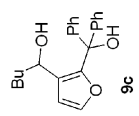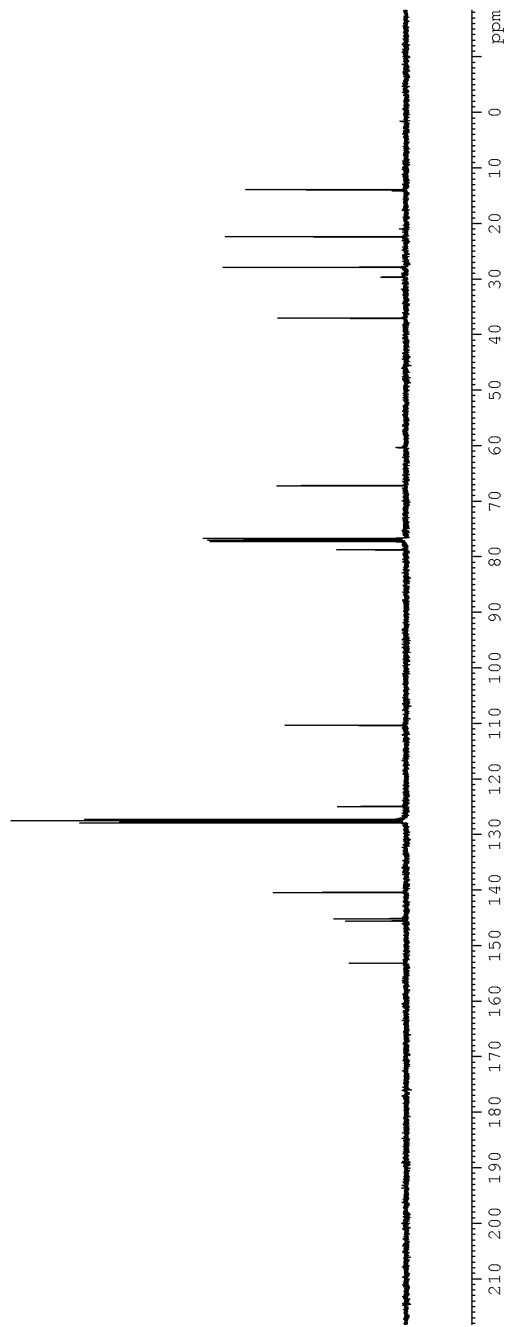

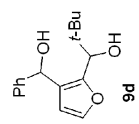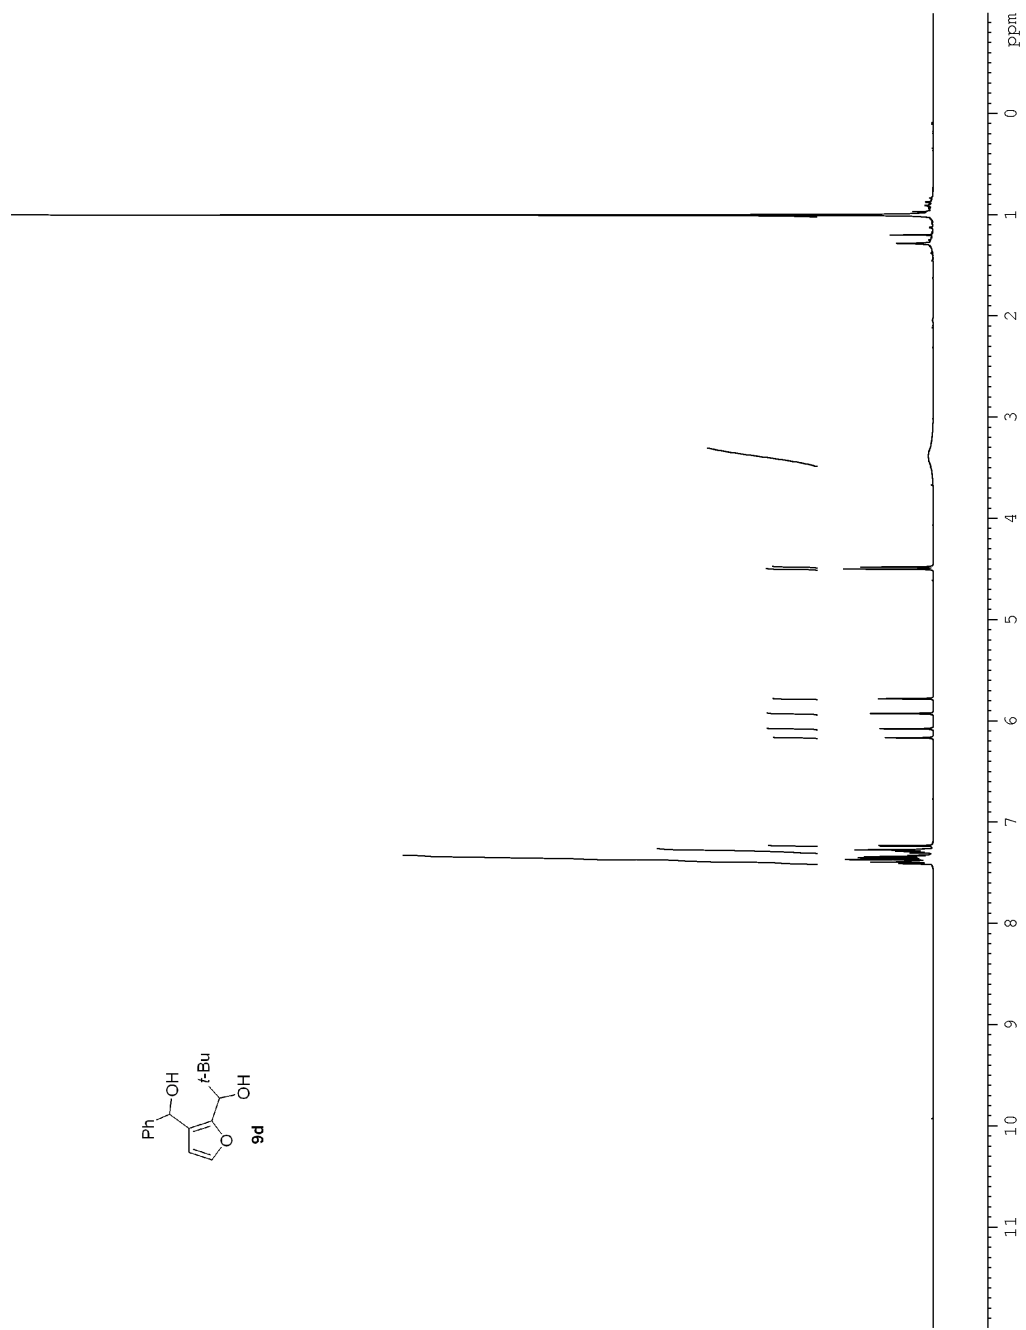

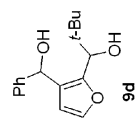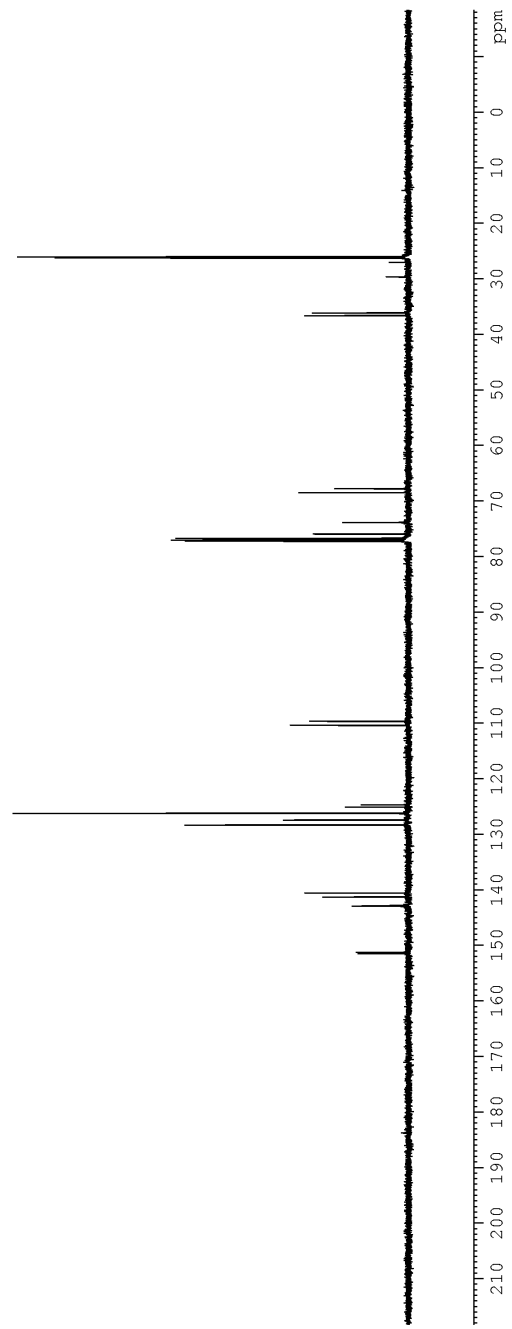

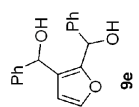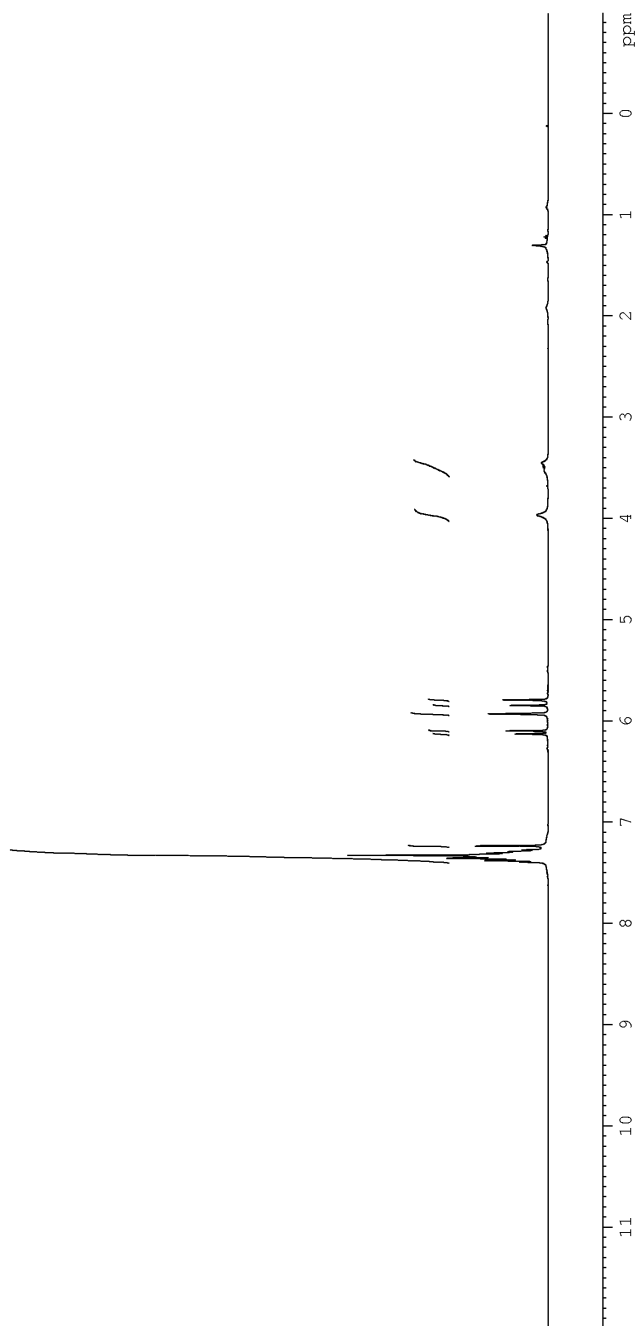

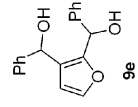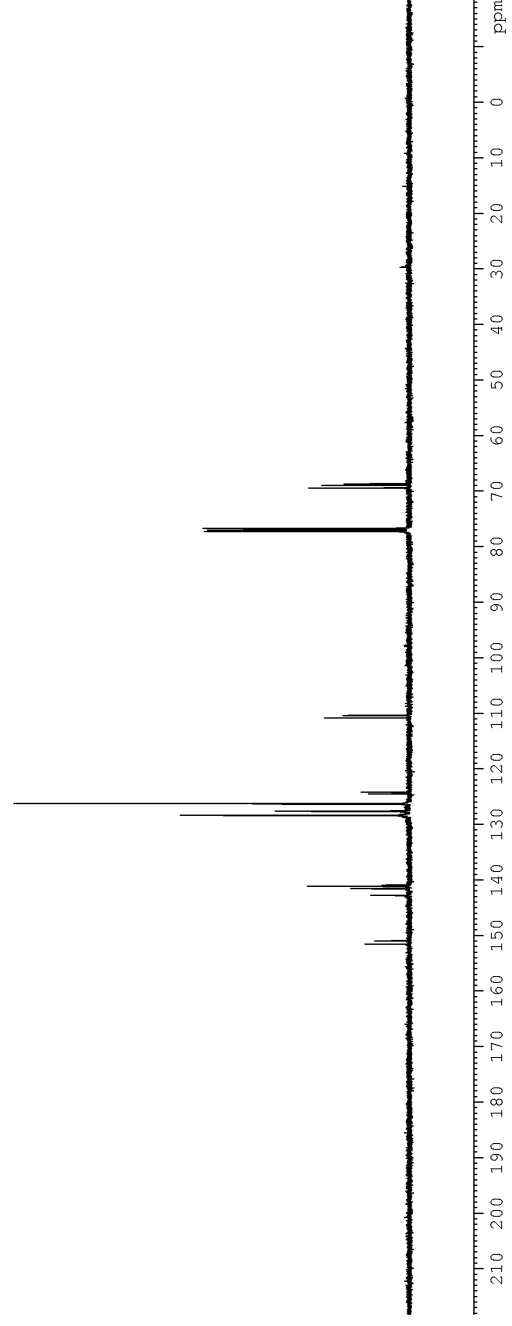

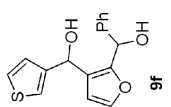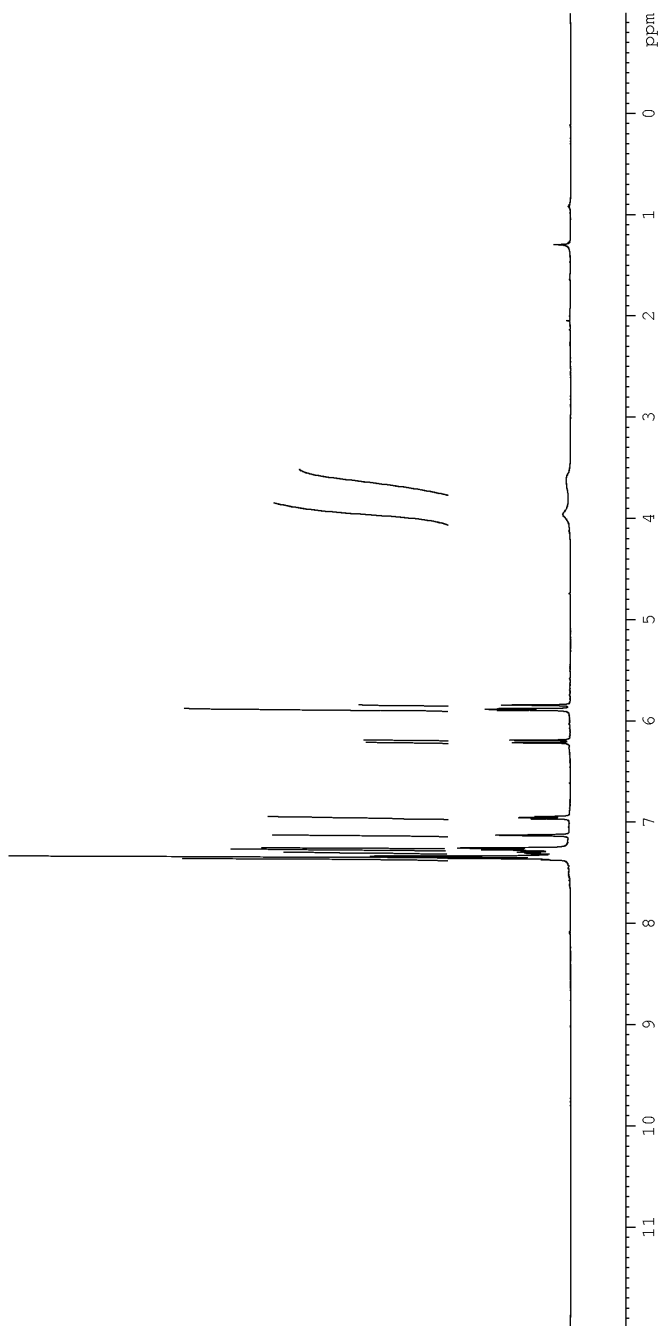

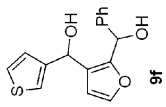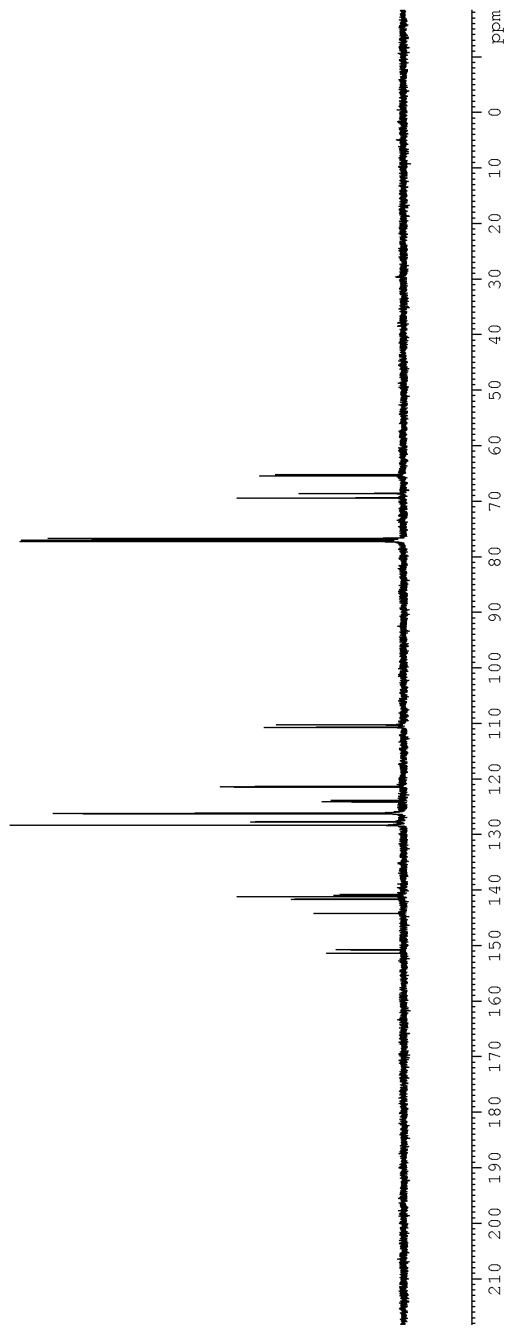



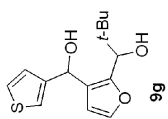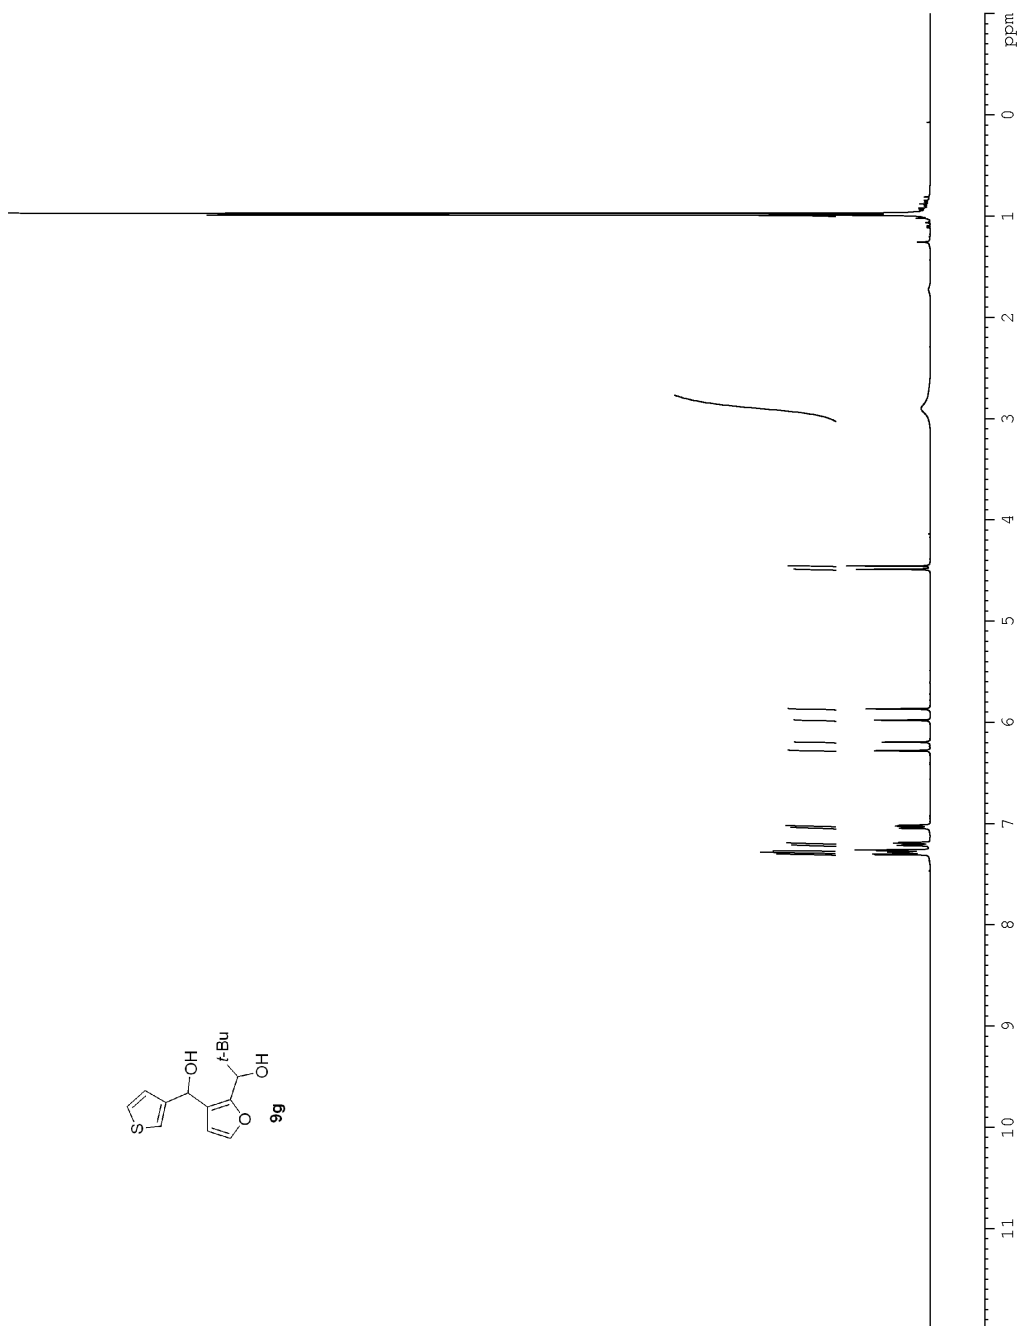

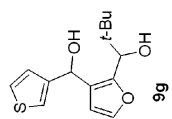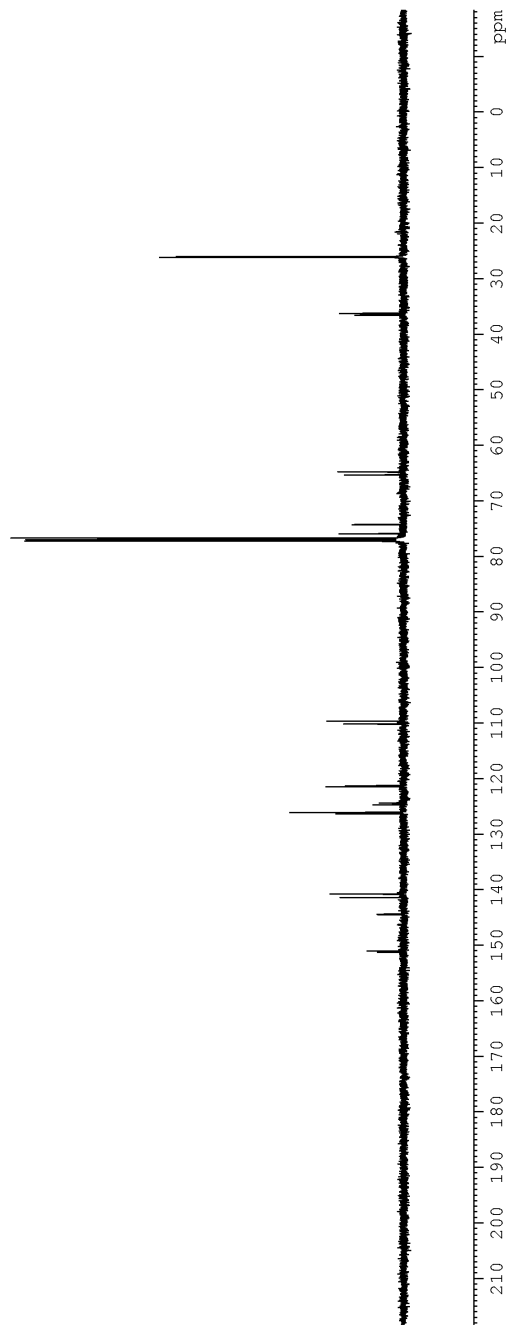

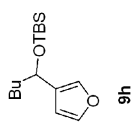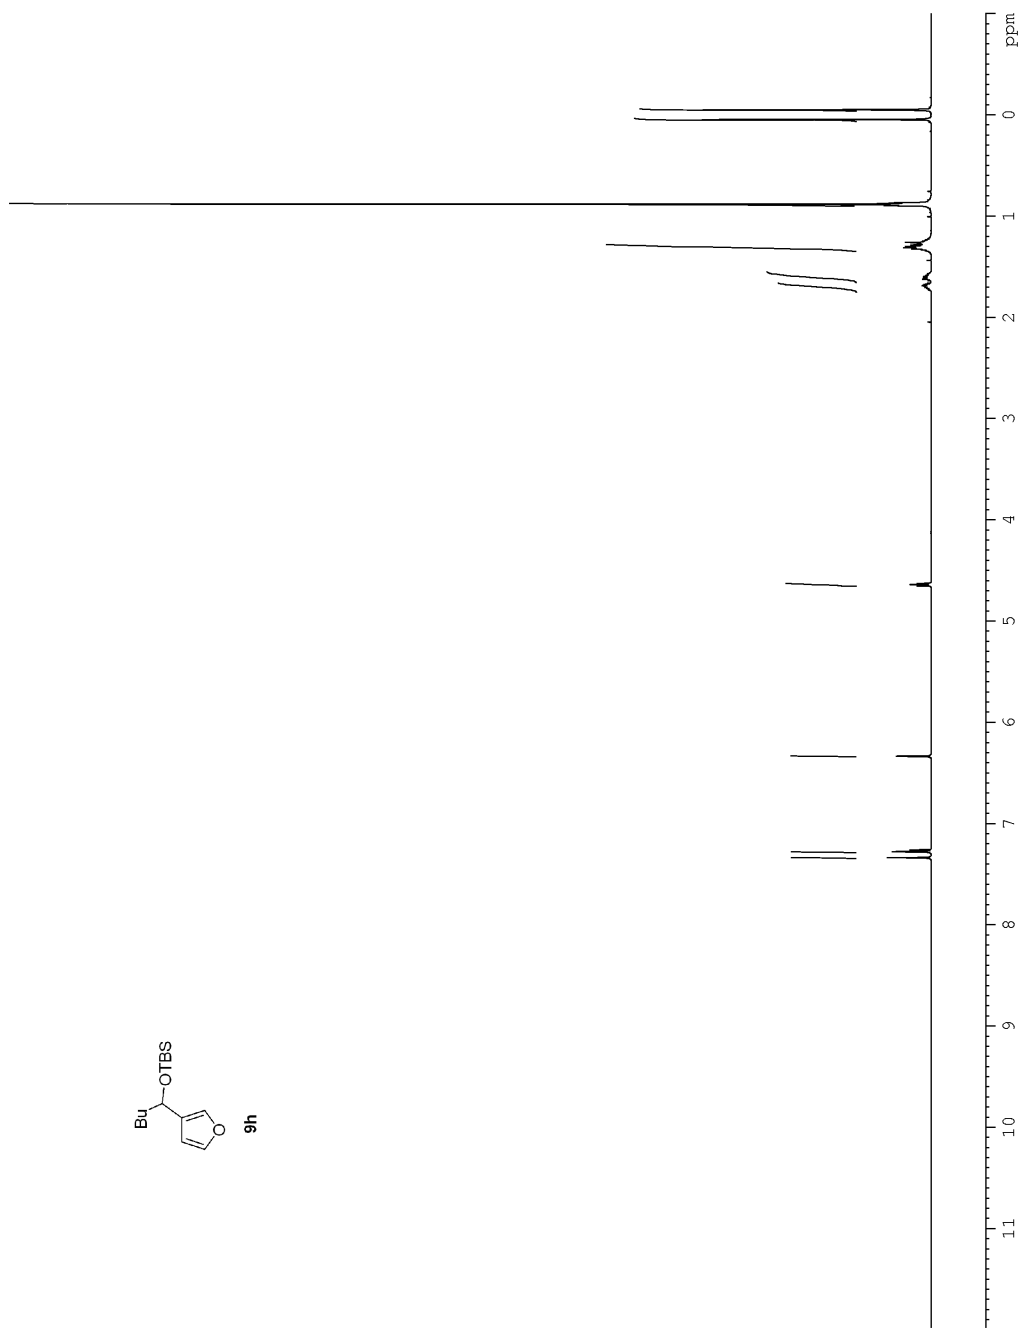

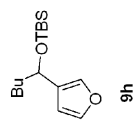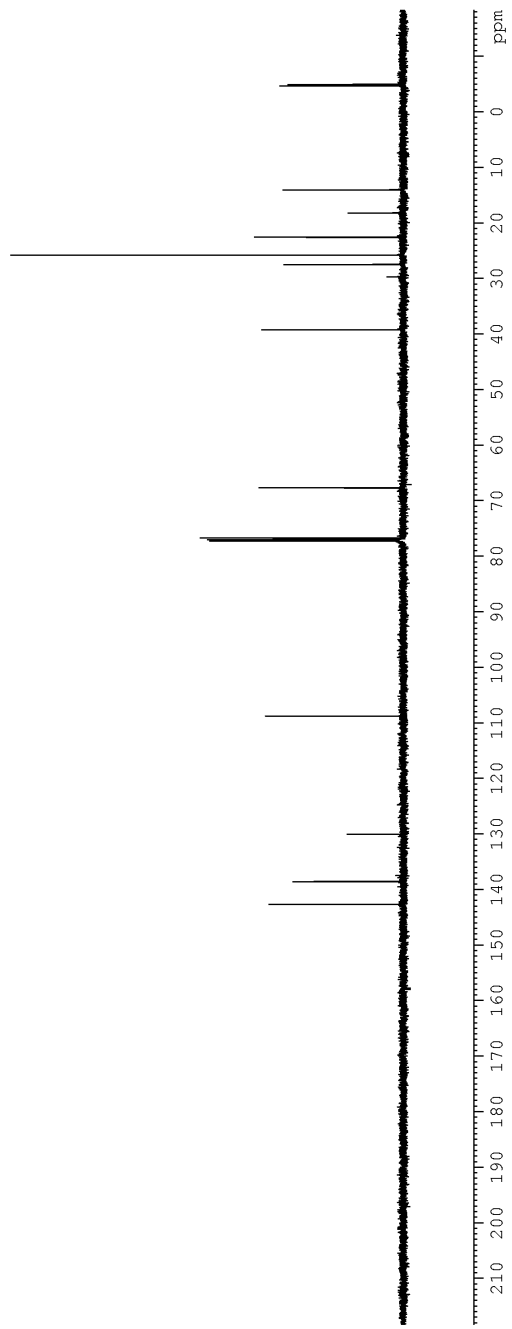

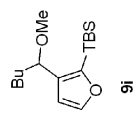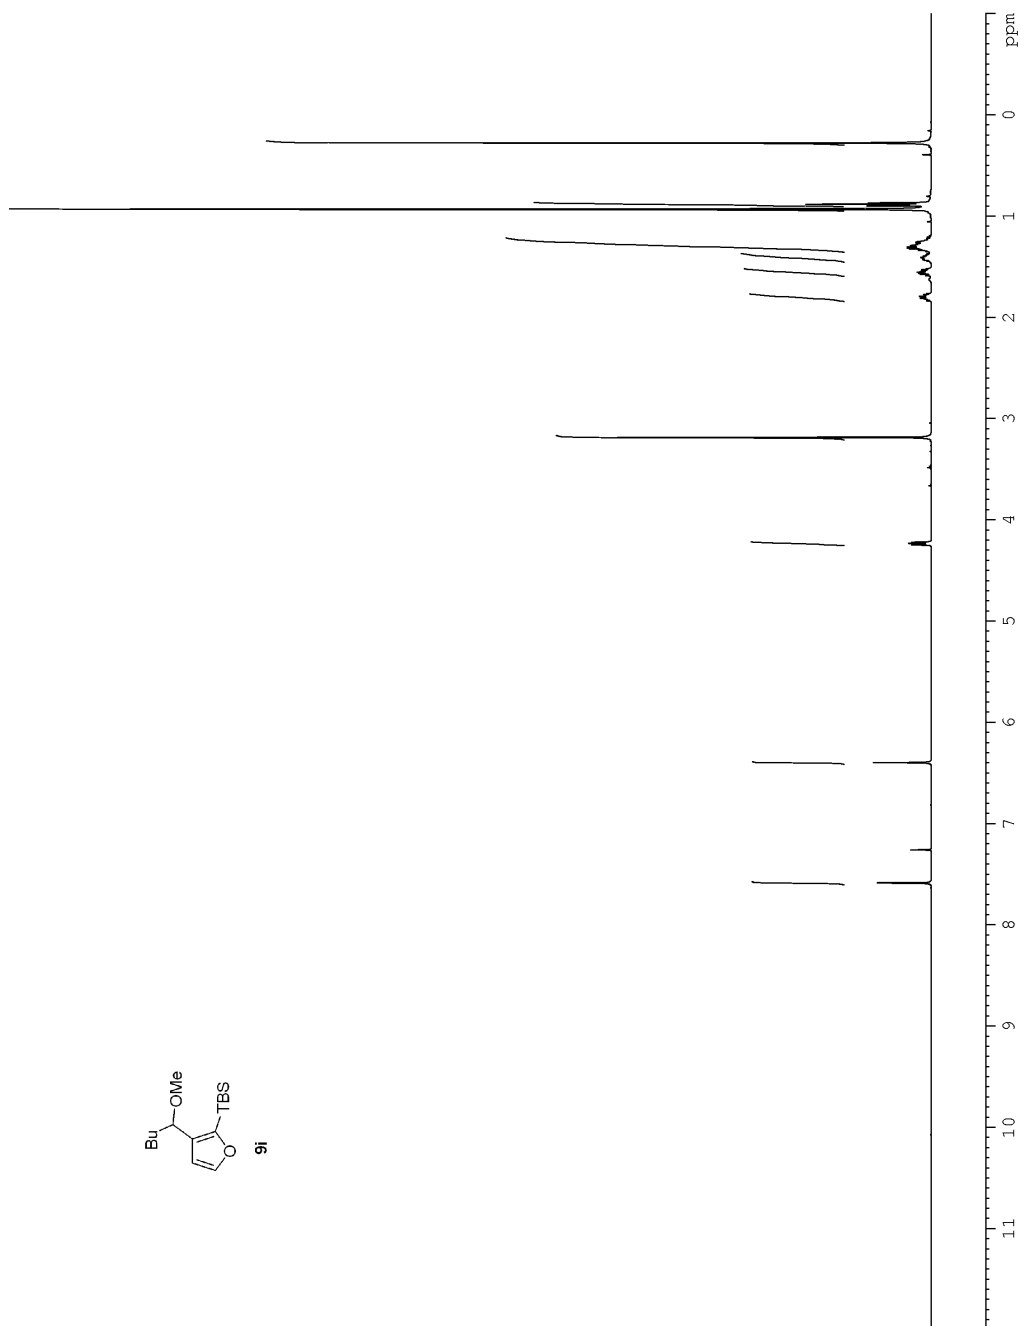

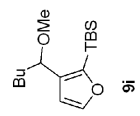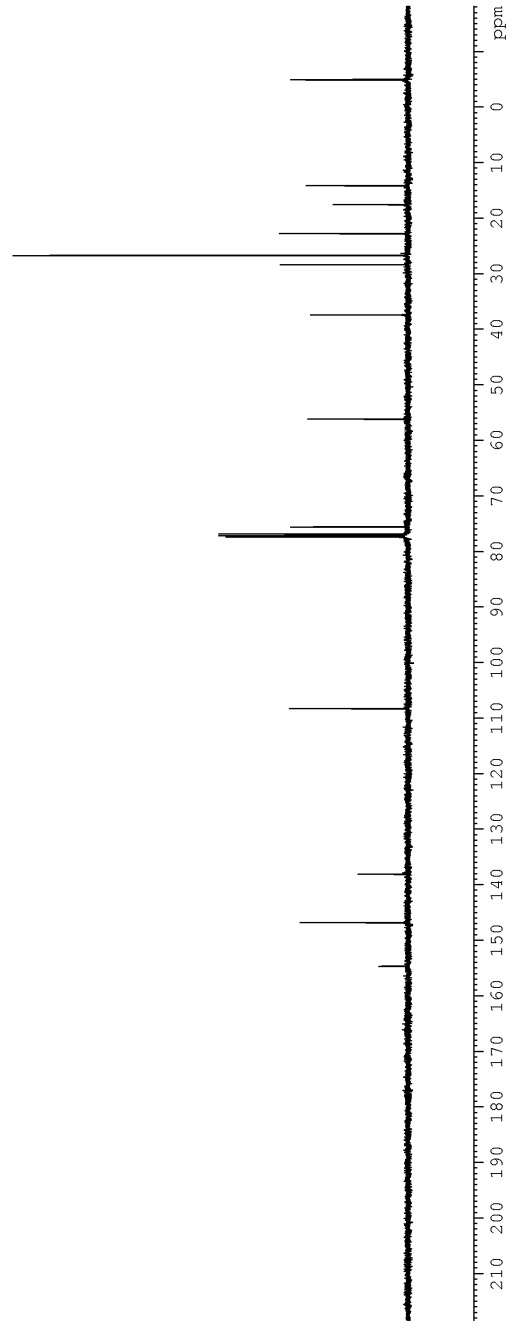



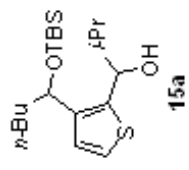

$^{13}\text{C}$  NMR, 75 MHz,  $\text{CDCl}_3$

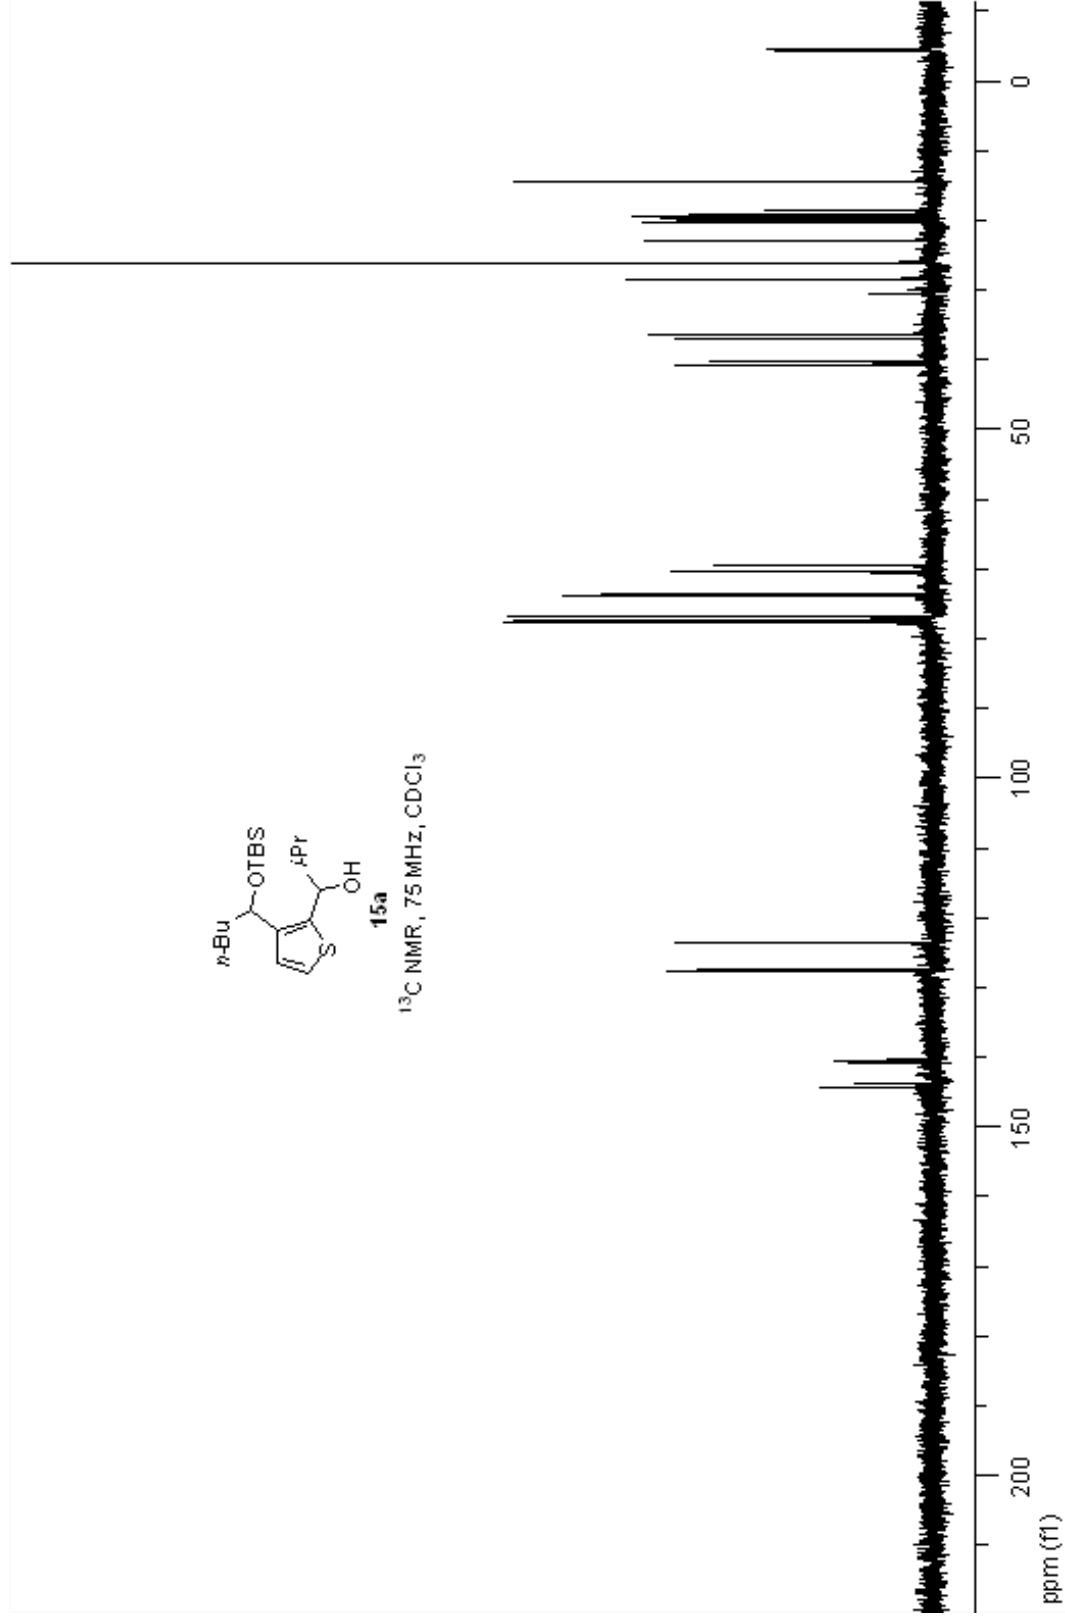



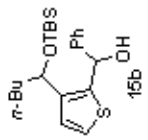

<sup>1</sup>H NMR, 300 MHz, CDCl<sub>3</sub>

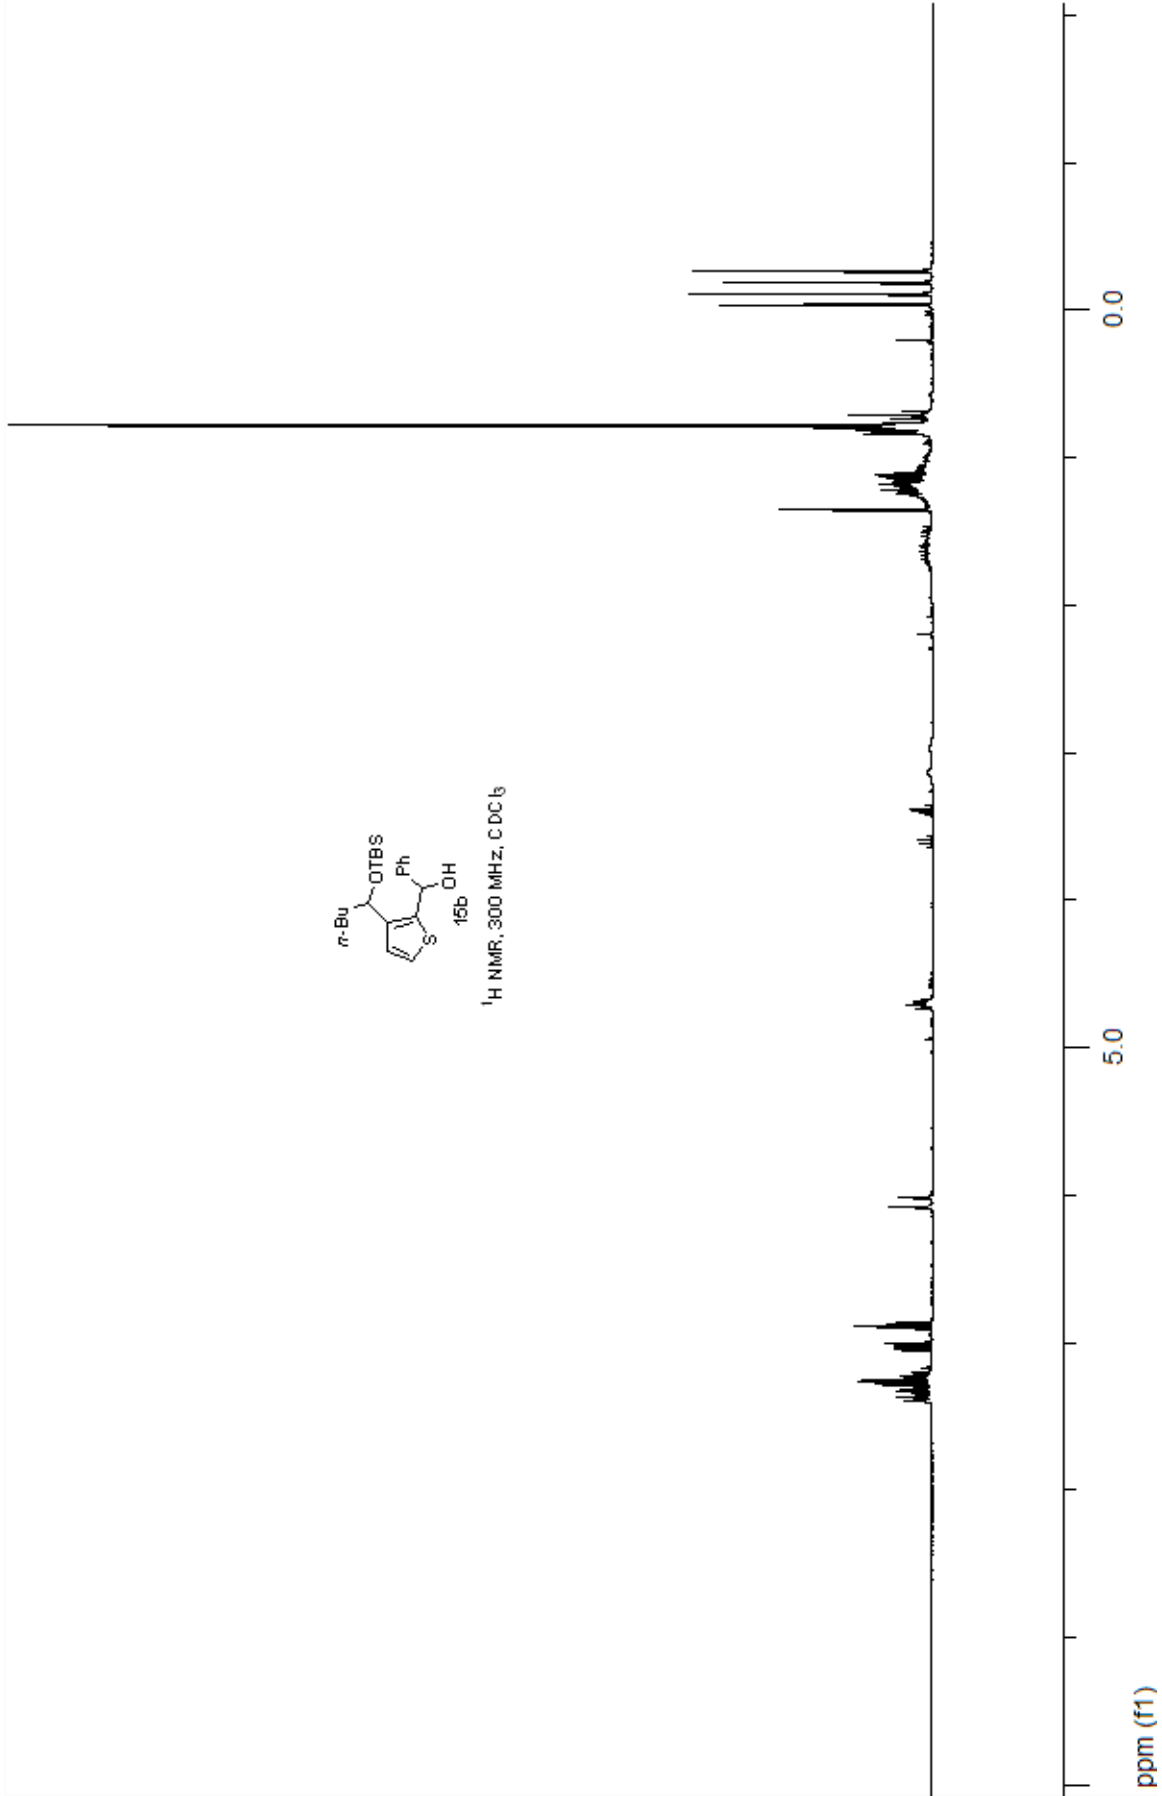

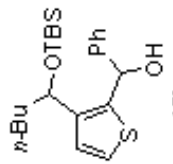

$^{13}\text{C}$  NMR, 75 MHz,  $\text{CDCl}_3$

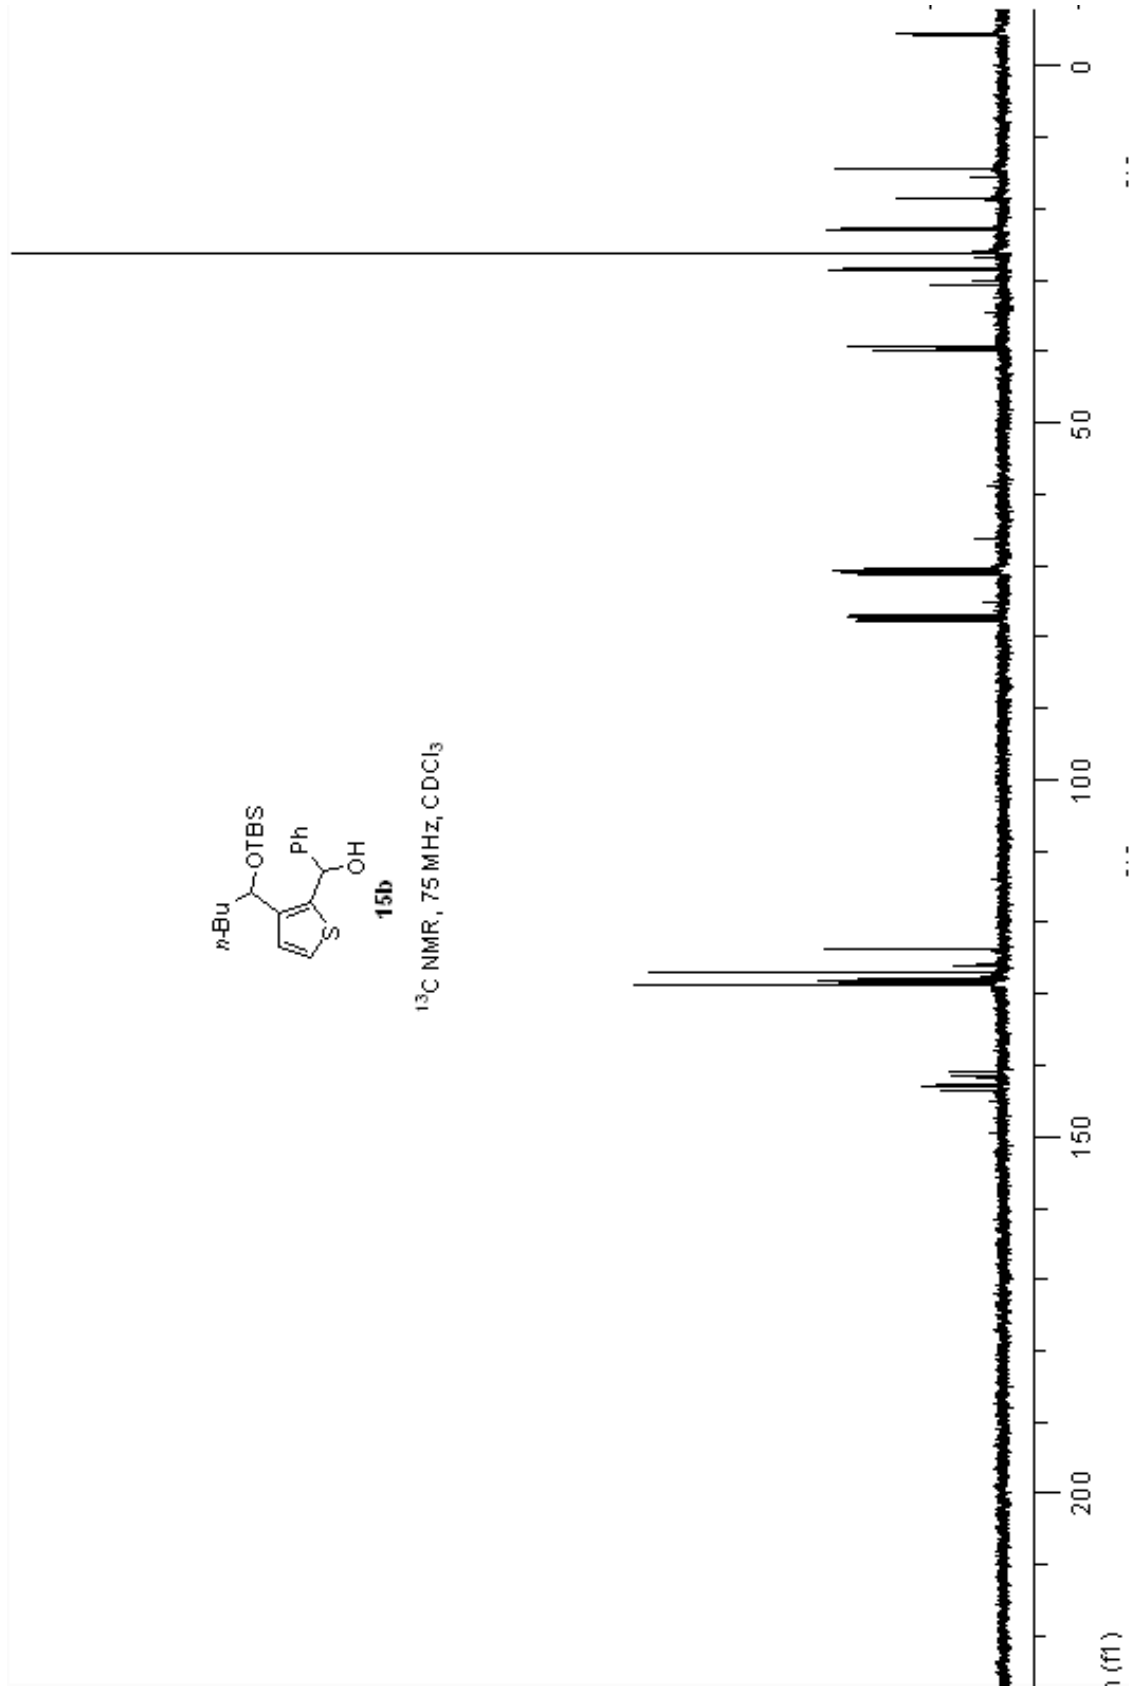

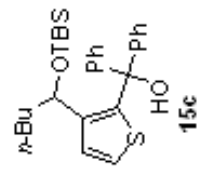

<sup>1</sup>H NMR, 300 MHz, CDCl<sub>3</sub>

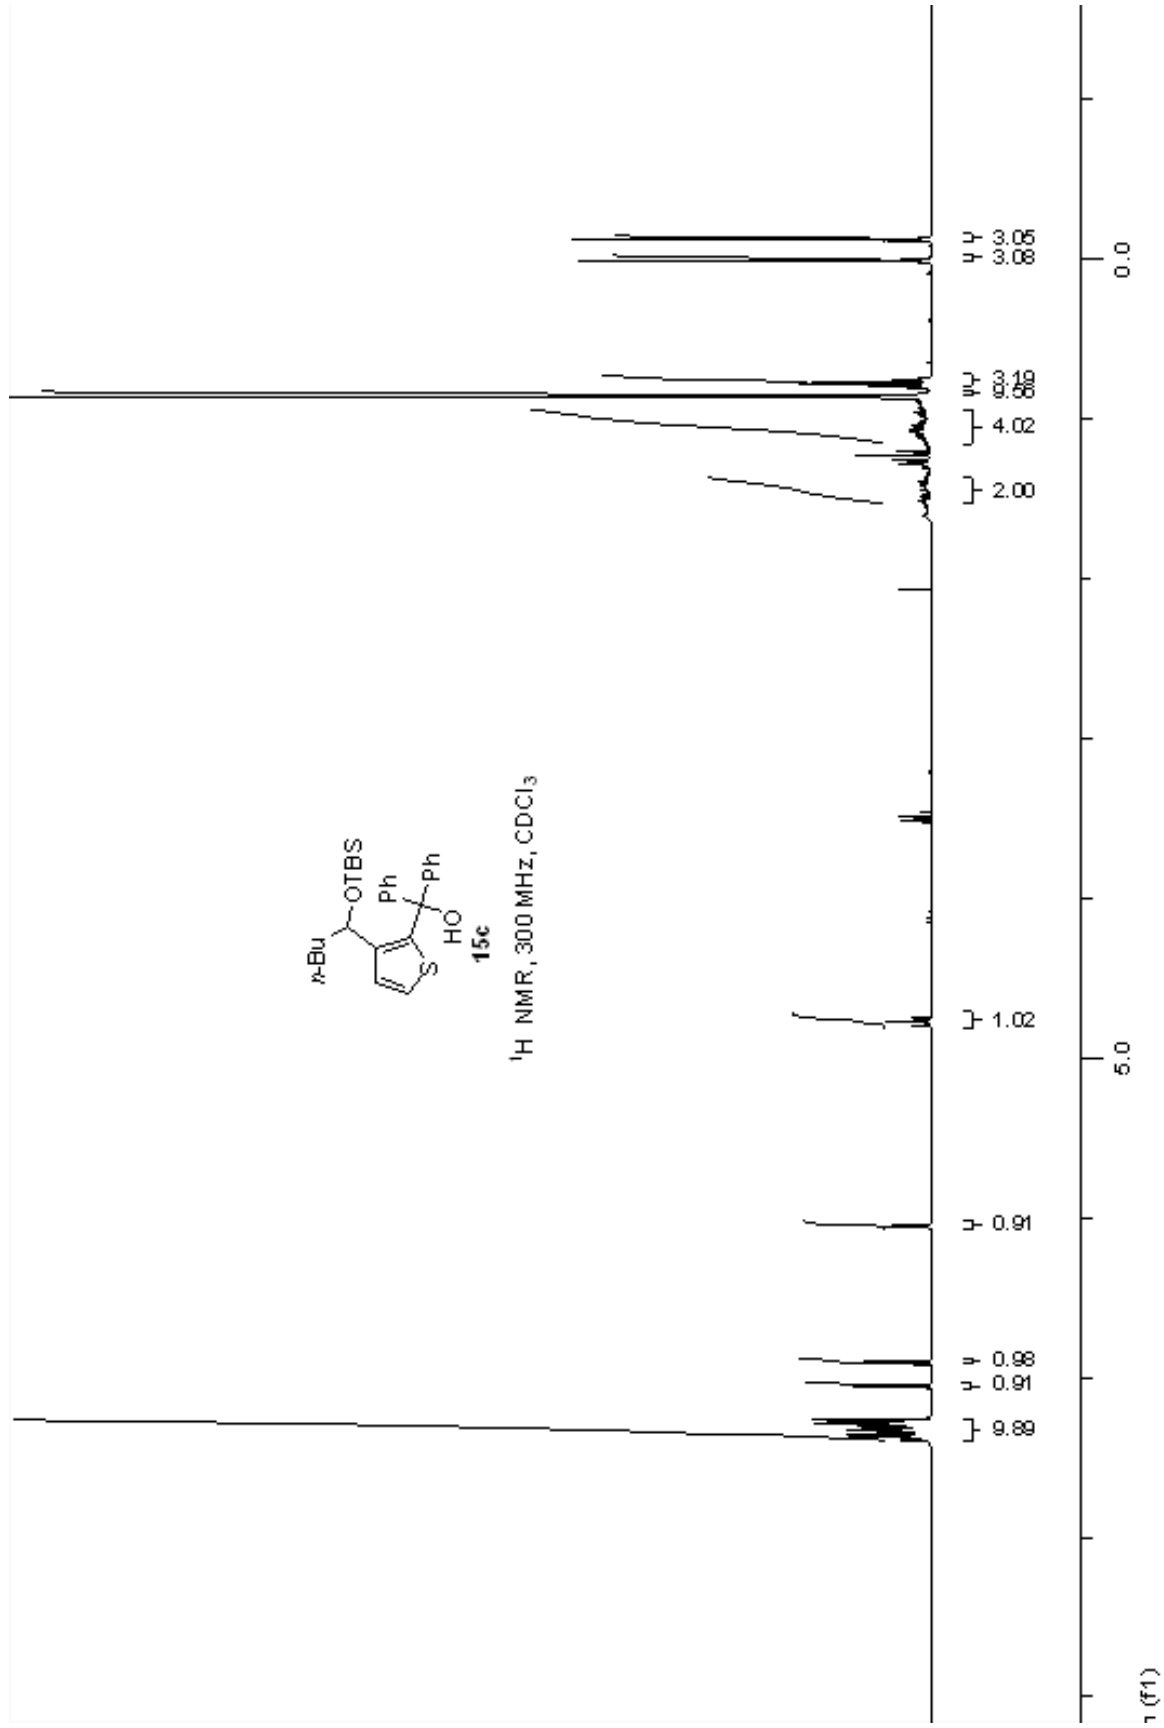

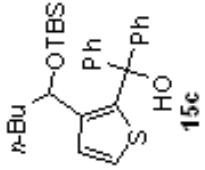

<sup>13</sup>C NMR, 75 MHz, CDCl<sub>3</sub>

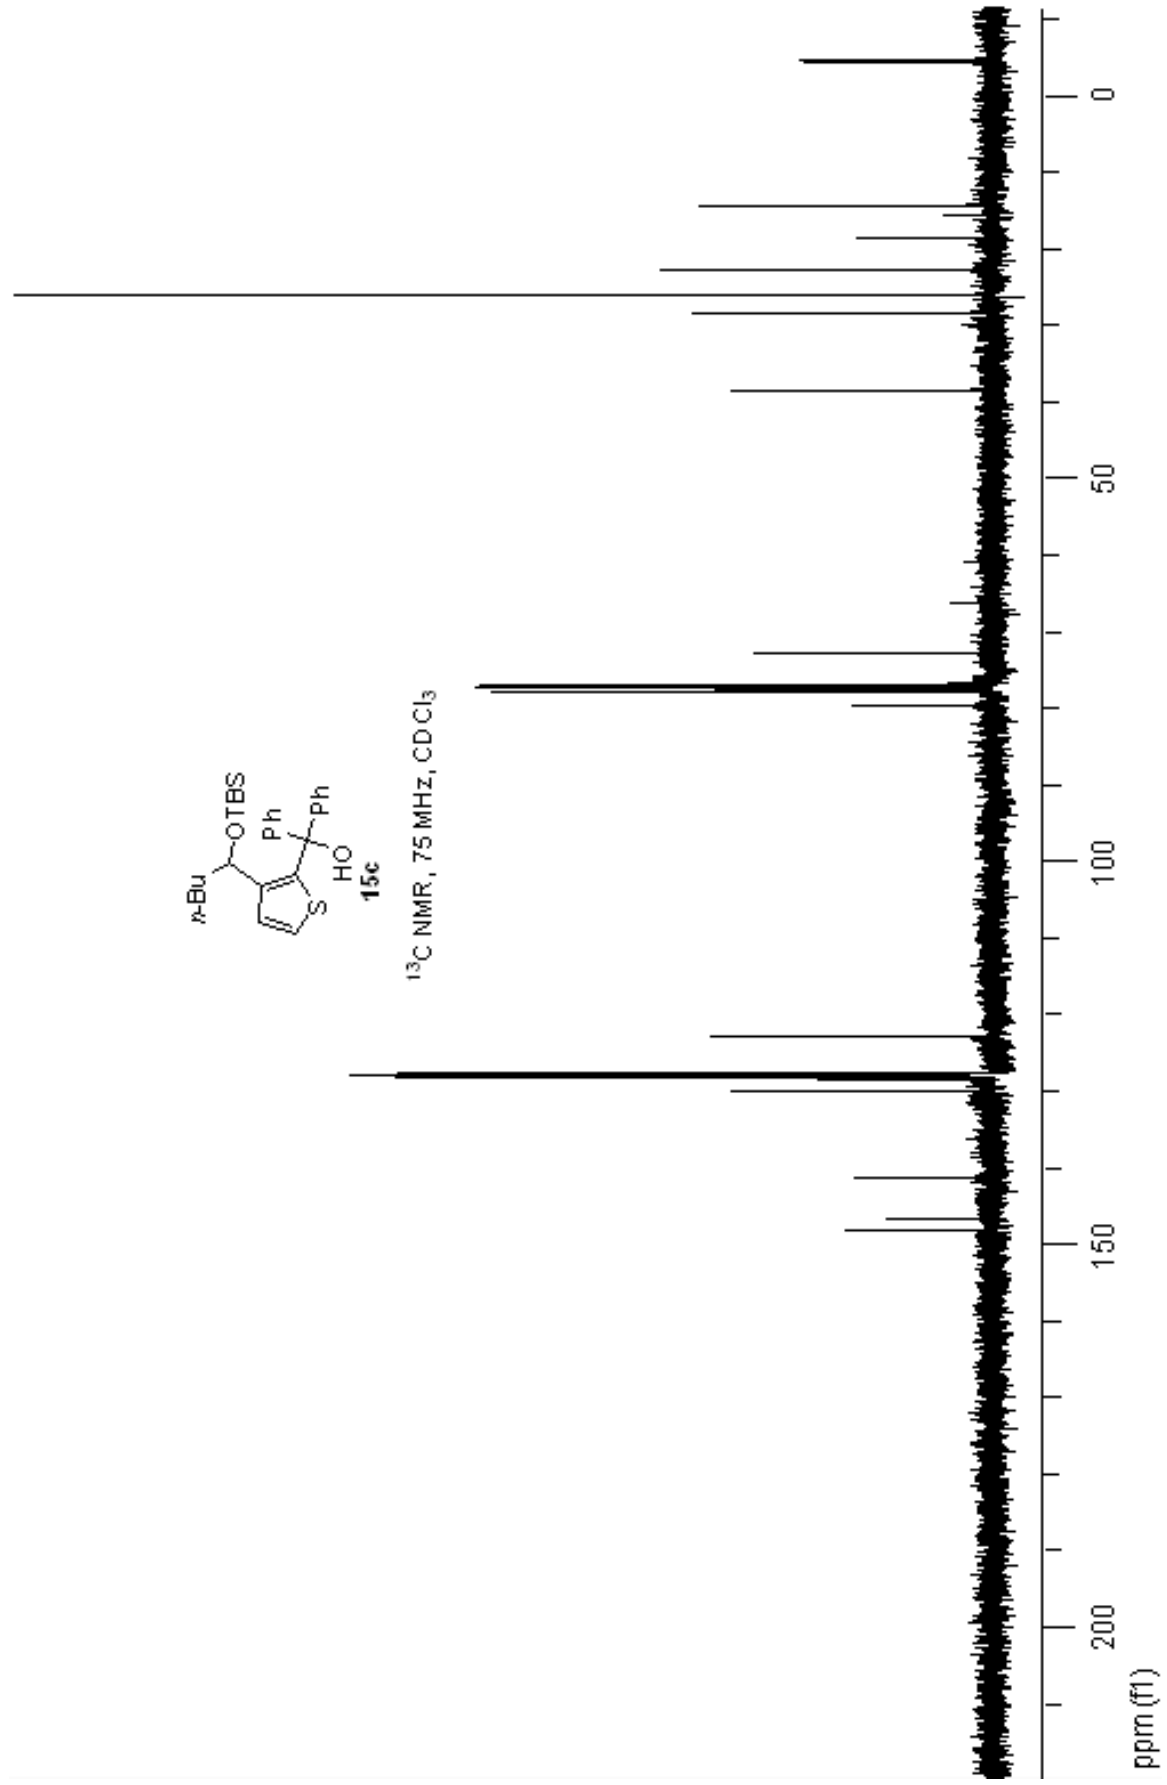

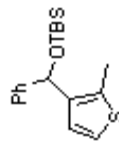

15d

<sup>1</sup>H NMR, 300 MHz, CDCl<sub>3</sub>

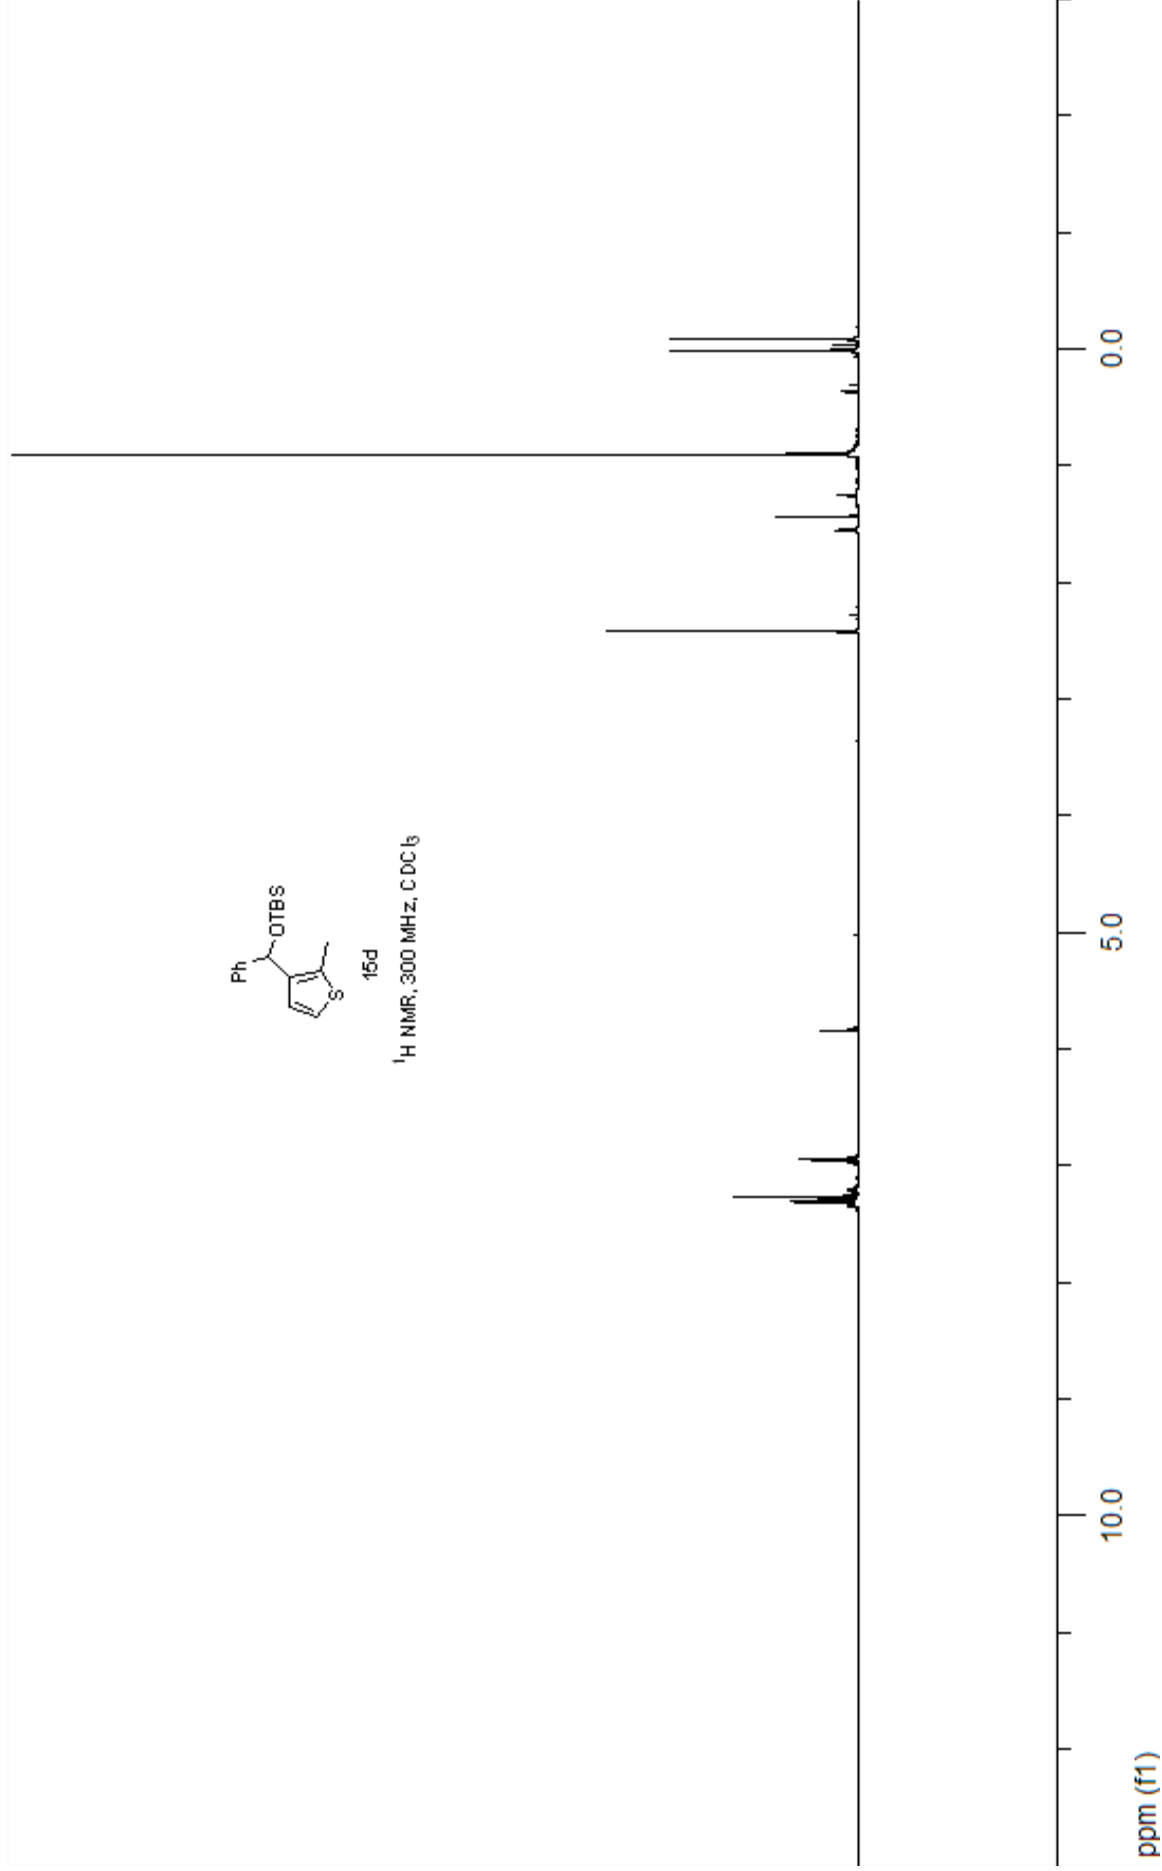

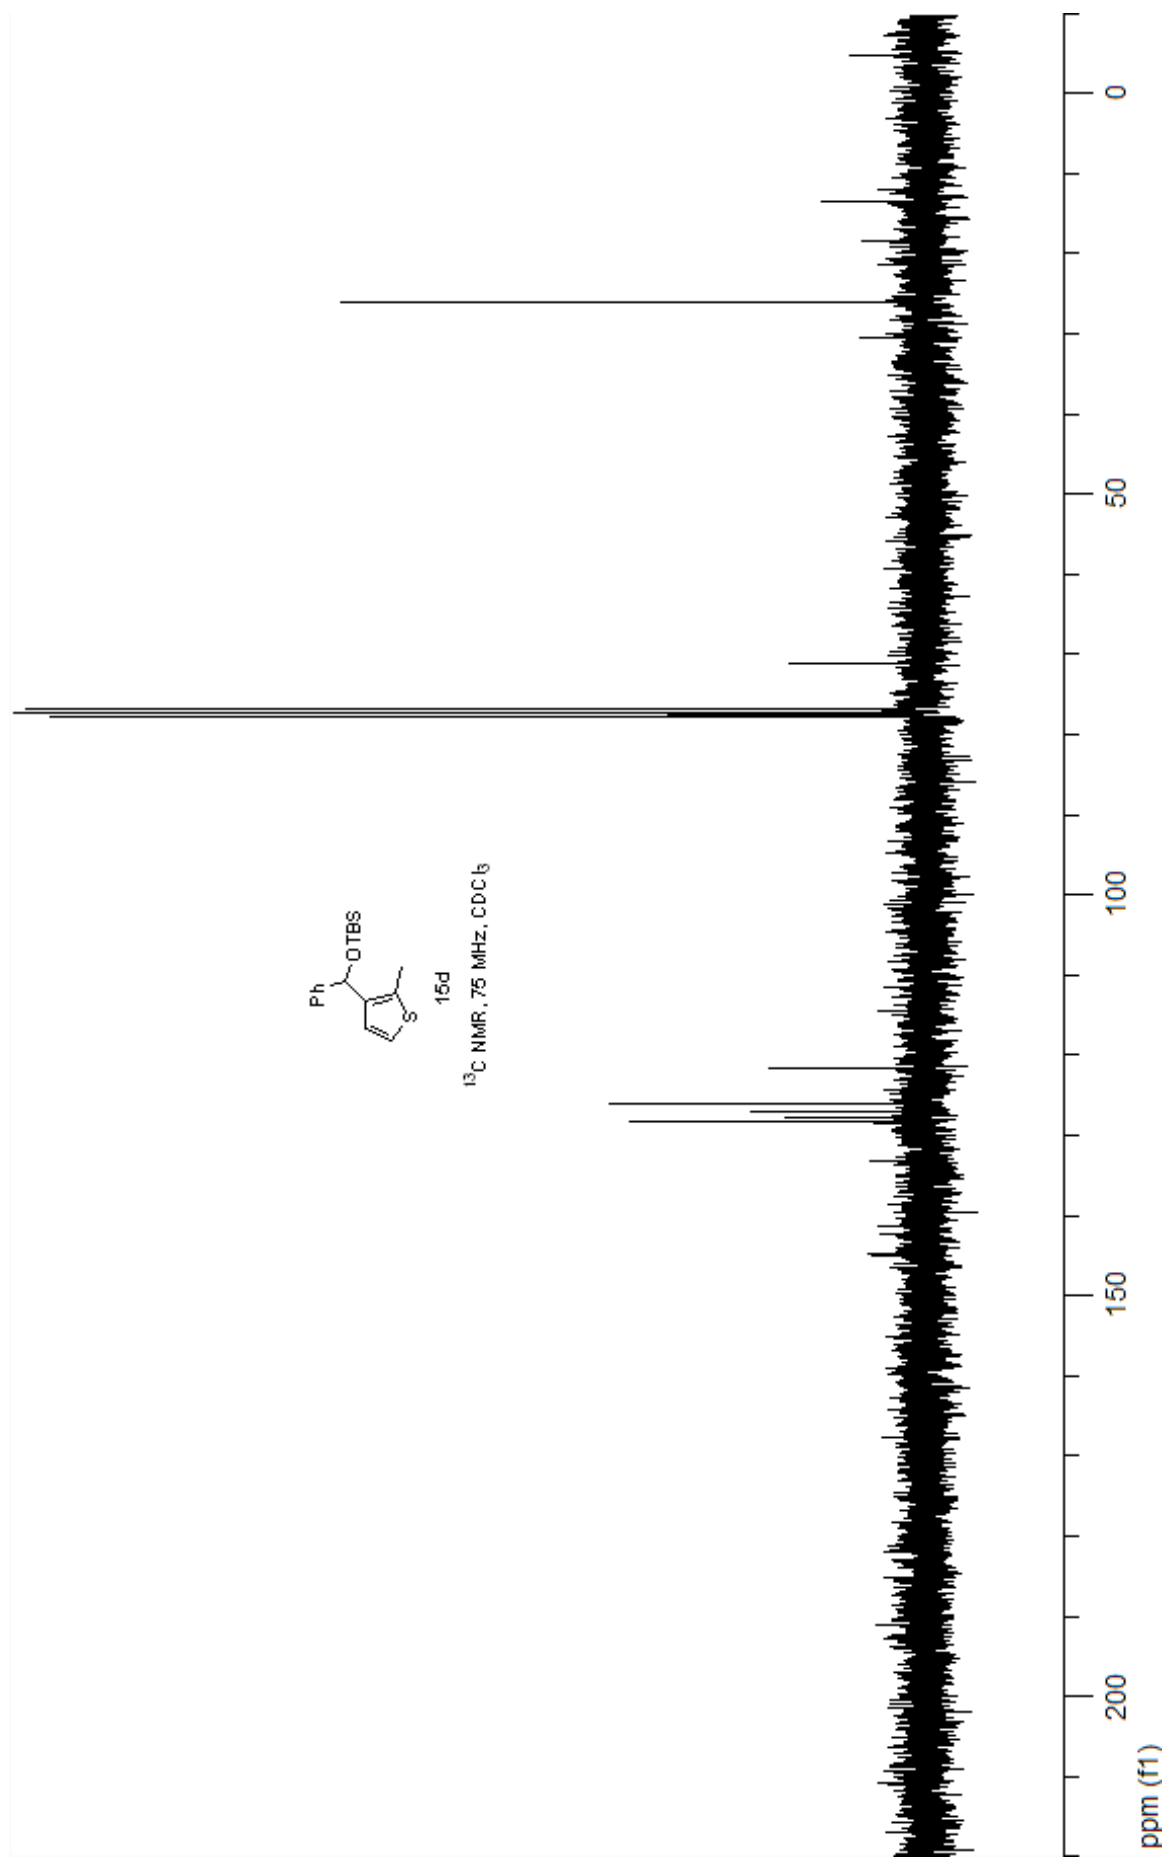

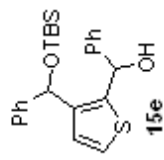

<sup>1</sup>H NMR, 300 MHz, CDCl<sub>3</sub>

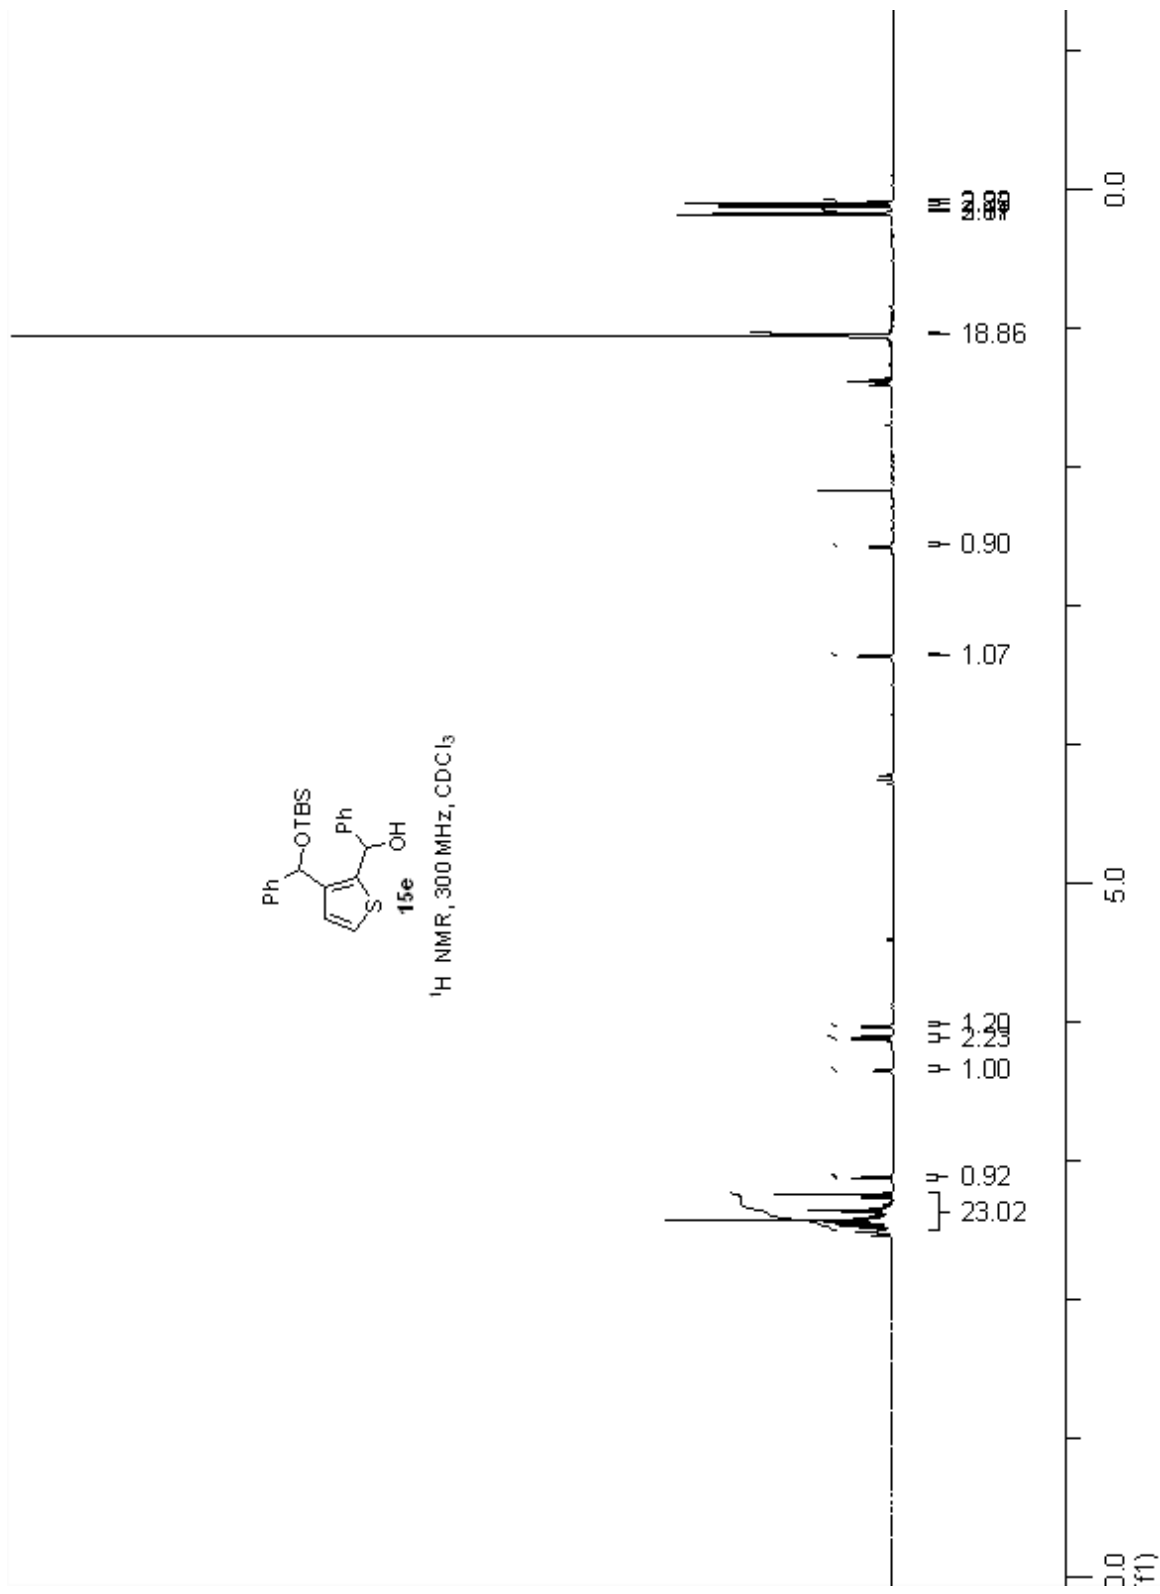

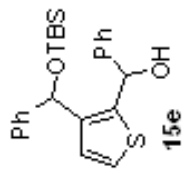

<sup>13</sup>C NMR, 75 MHz, CDCl<sub>3</sub>

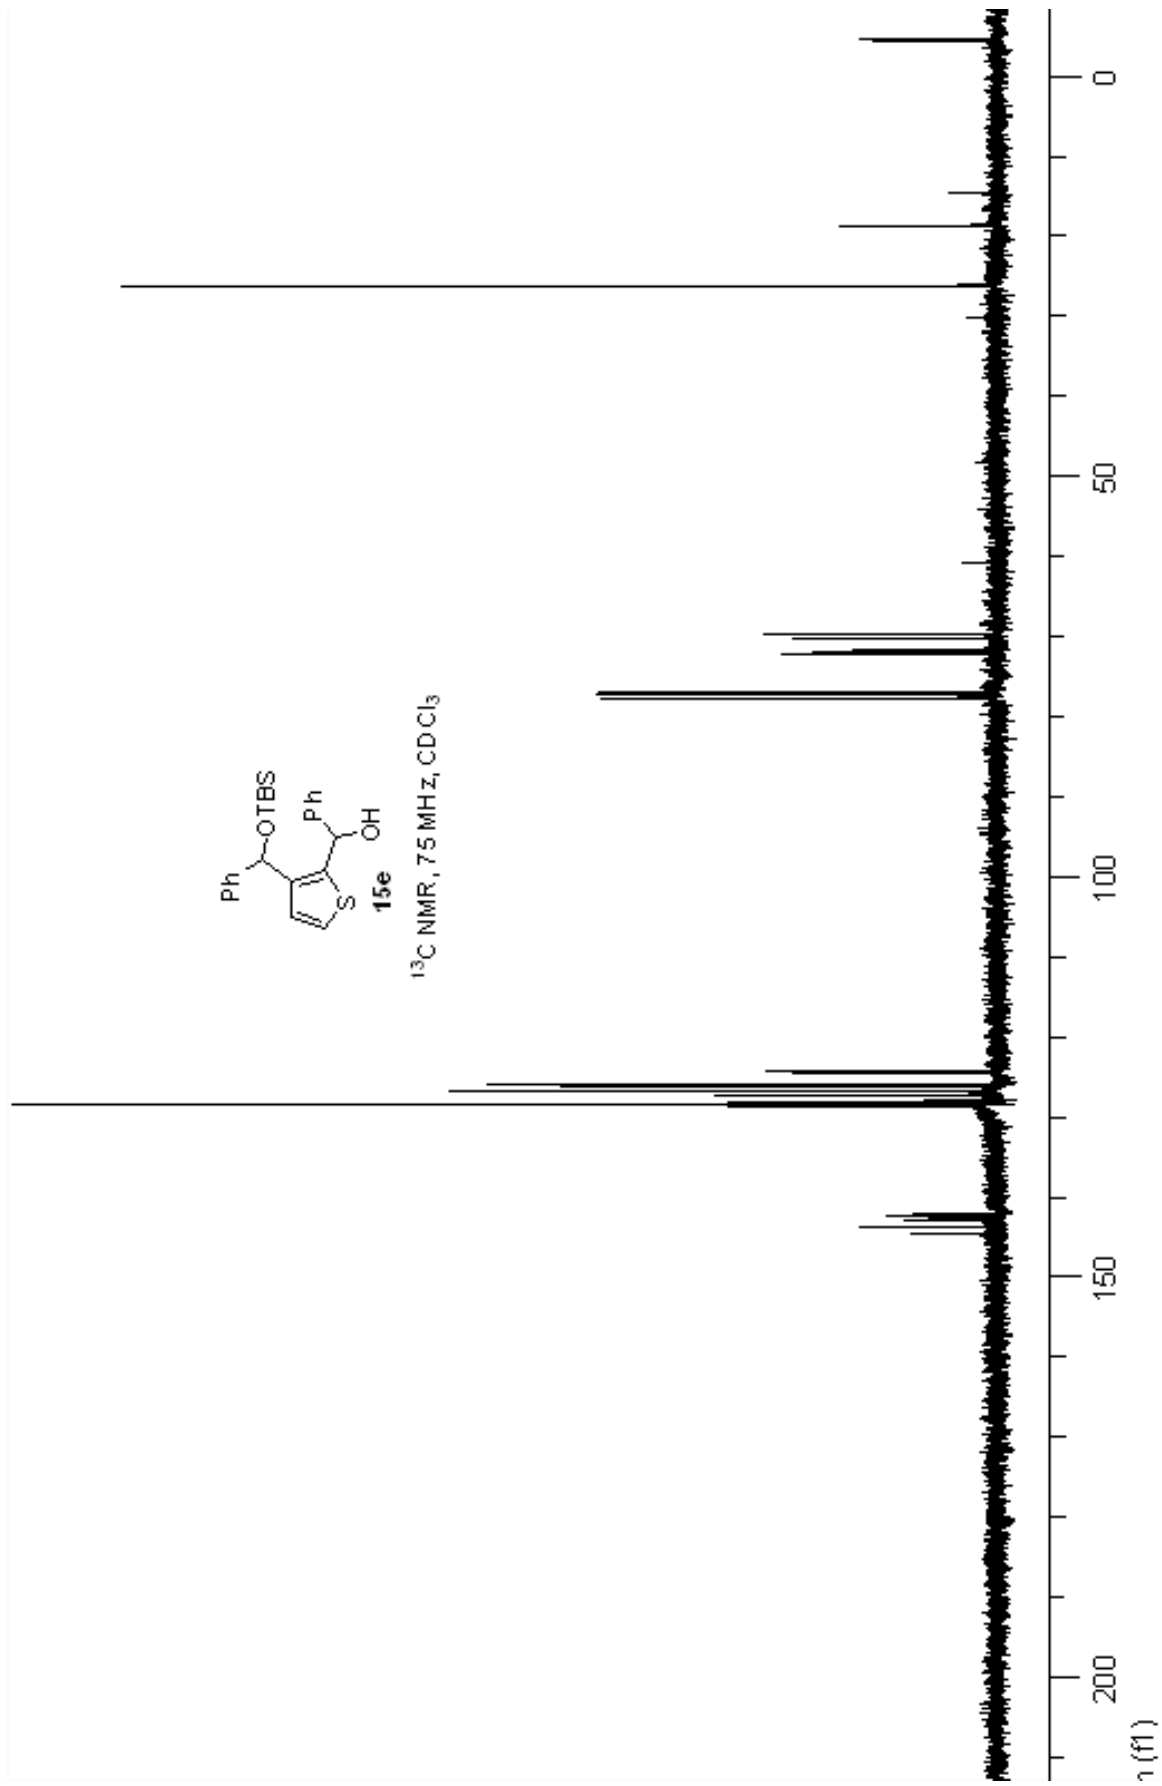



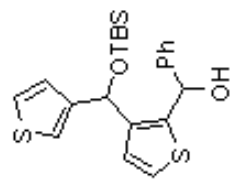

**15f**

<sup>1</sup>H NMR, 300 MHz, CDCl<sub>3</sub>

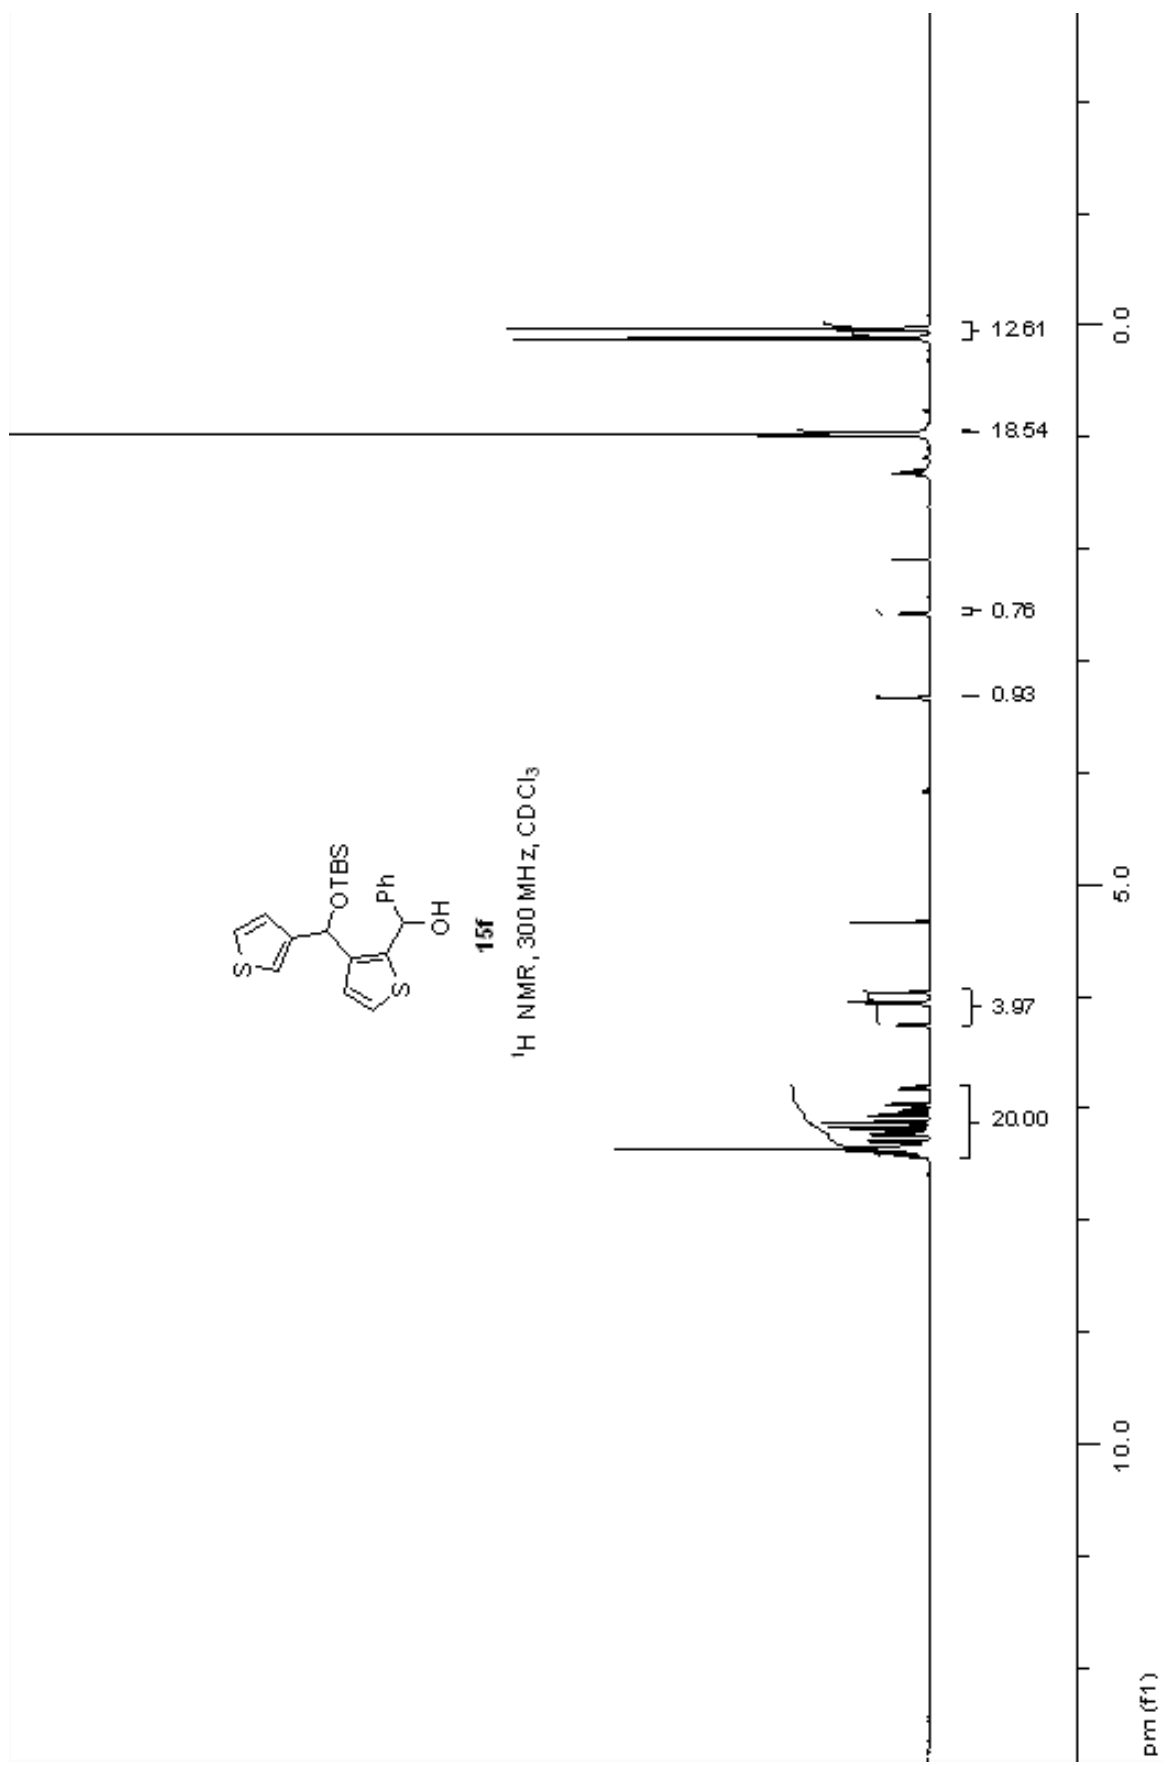

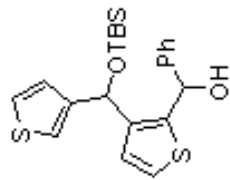

**15f**

$^{13}\text{C}$  NMR, 75 MHz,  $\text{CDCl}_3$

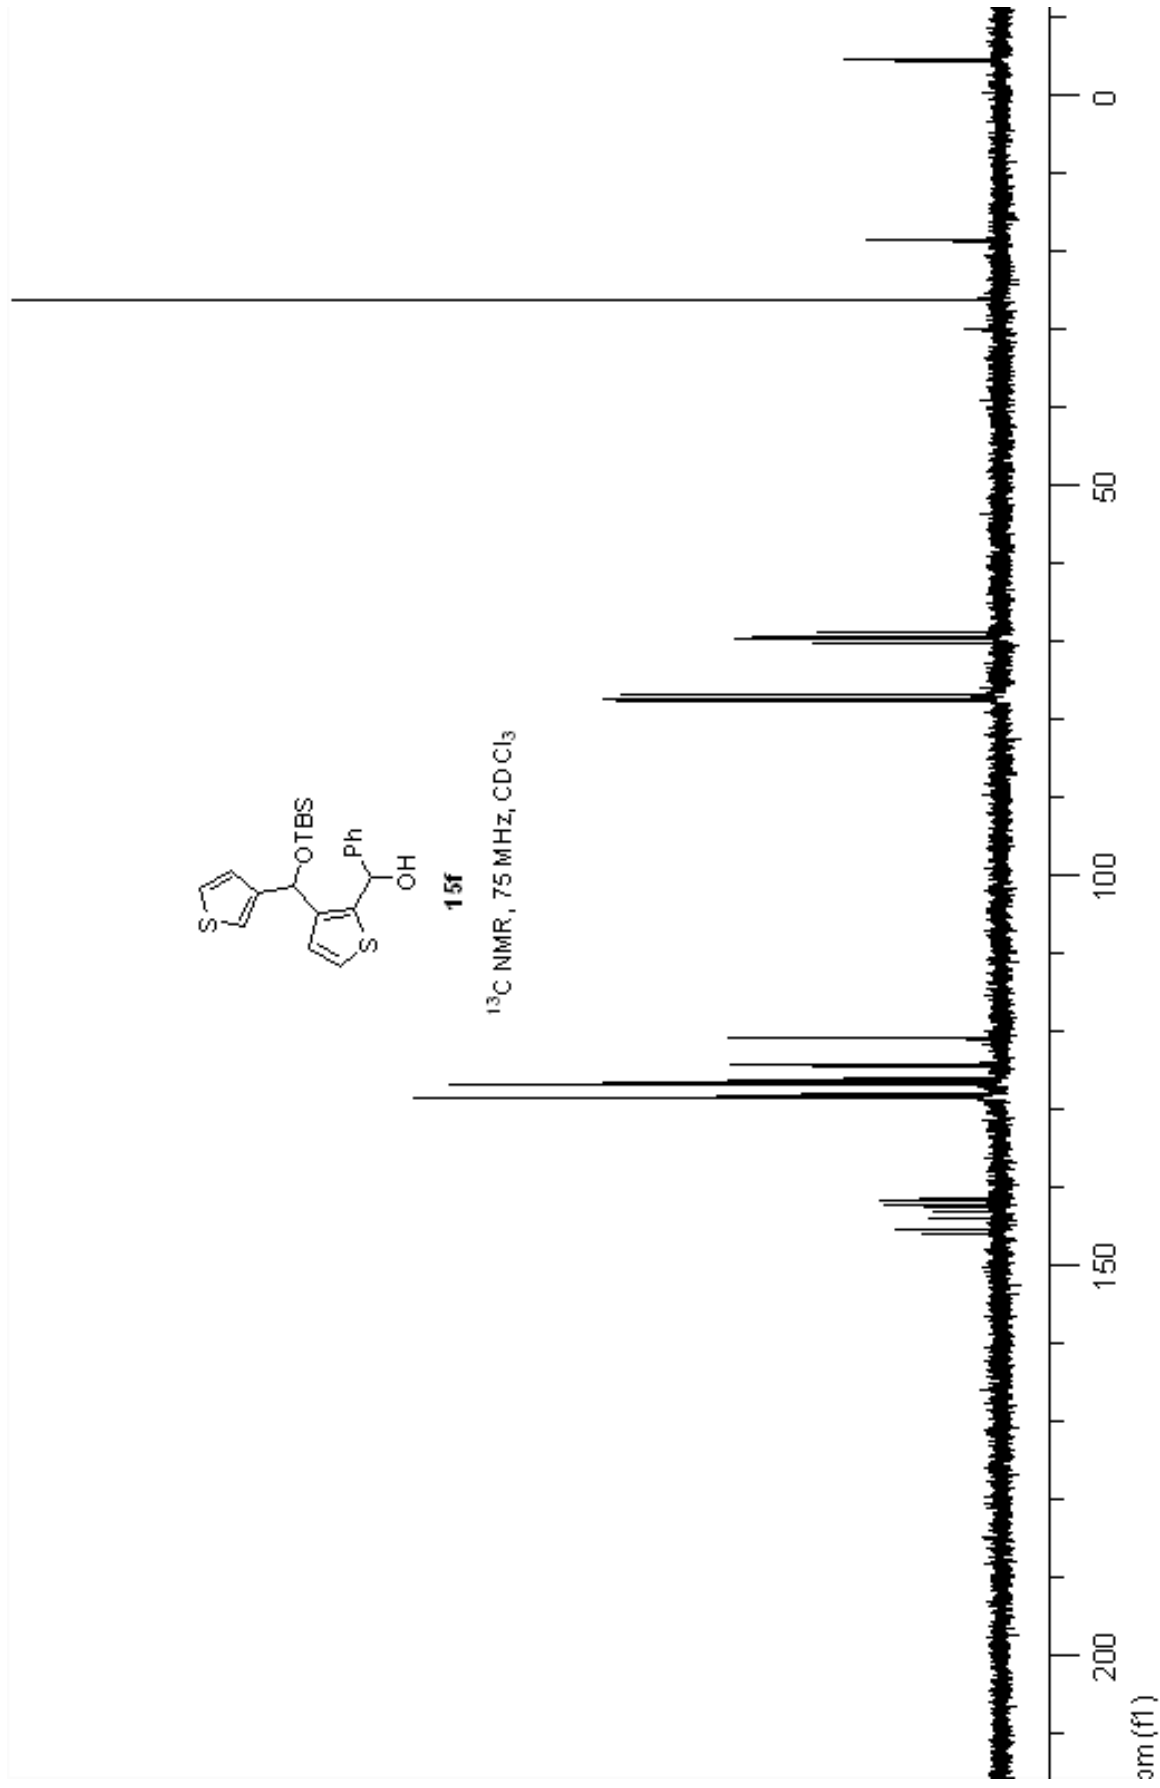

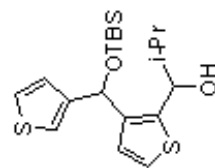

15g

<sup>1</sup>H NMR, 300 MHz, CDCl<sub>3</sub>

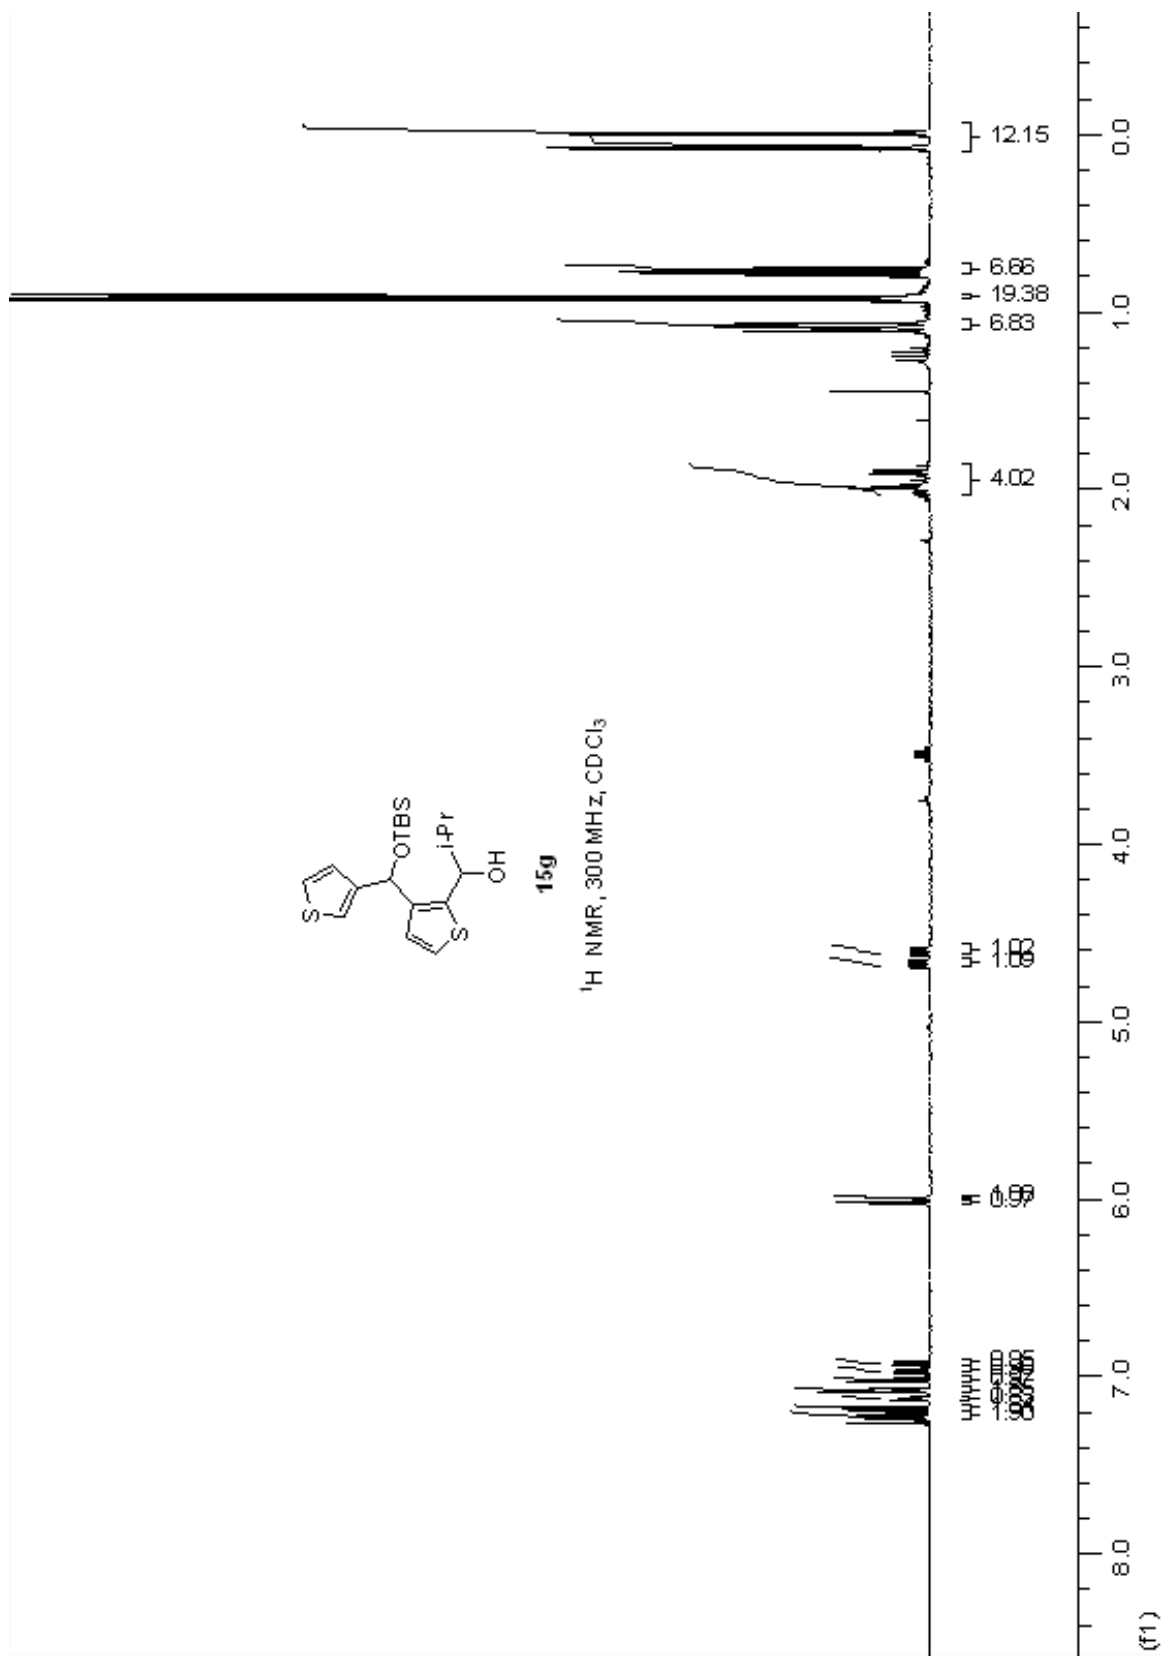

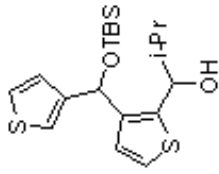

**15g**

$^{13}\text{C}$  NMR, 75 MHz,  $\text{CDCl}_3$

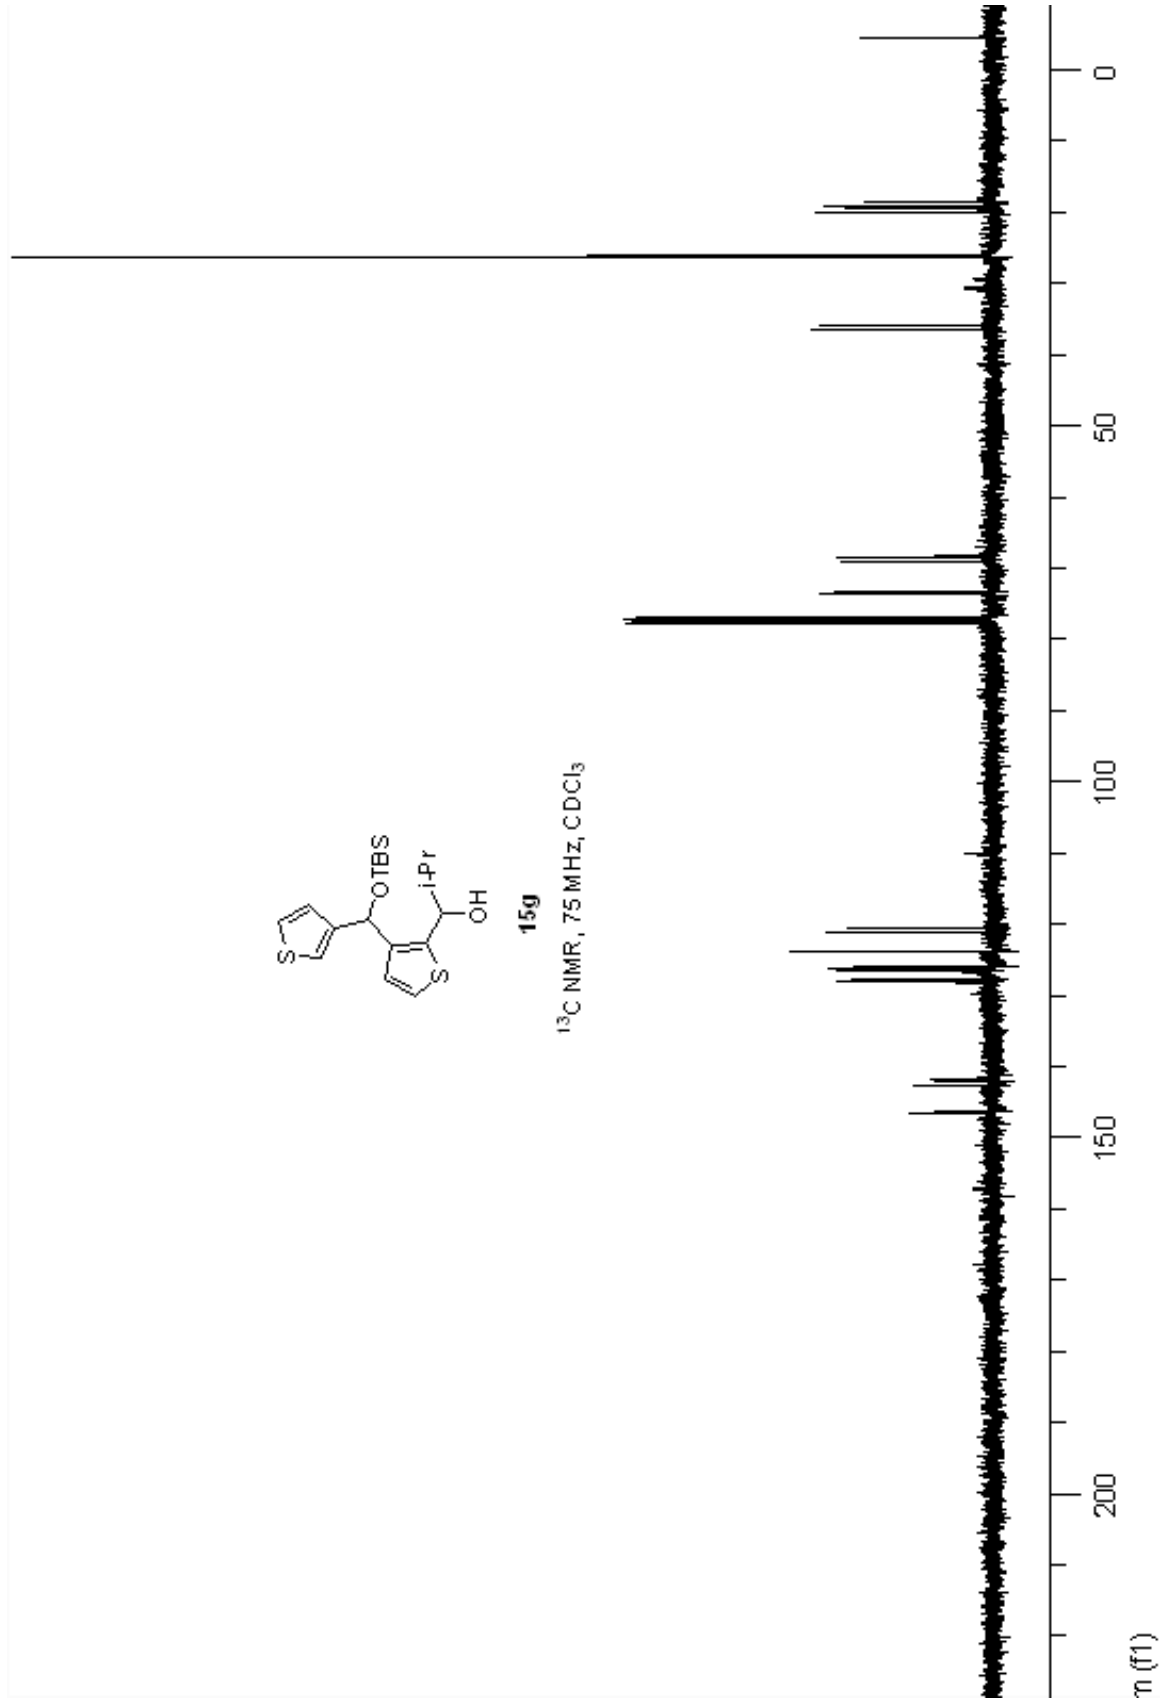

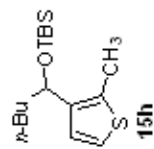

<sup>1</sup>H NMR, 300 MHz, CDCl<sub>3</sub>

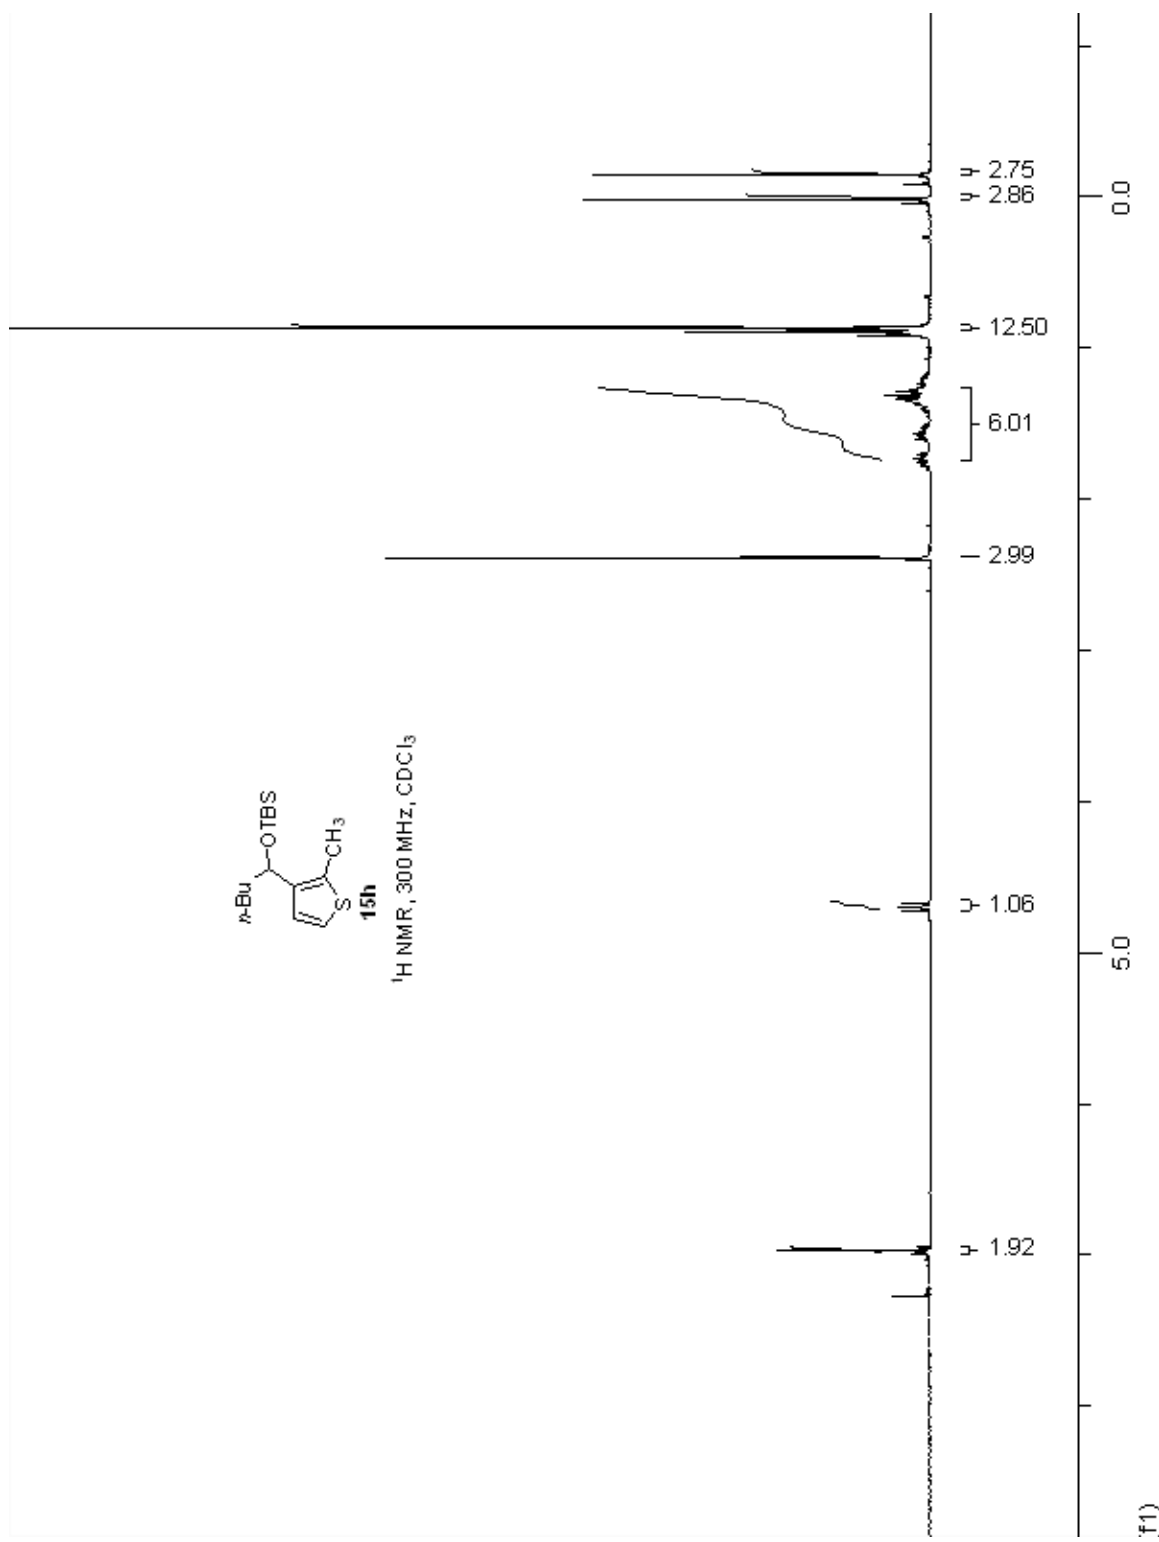

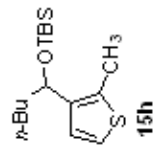

$^{13}\text{C}$  NMR, 75 MHz,  $\text{CDCl}_3$

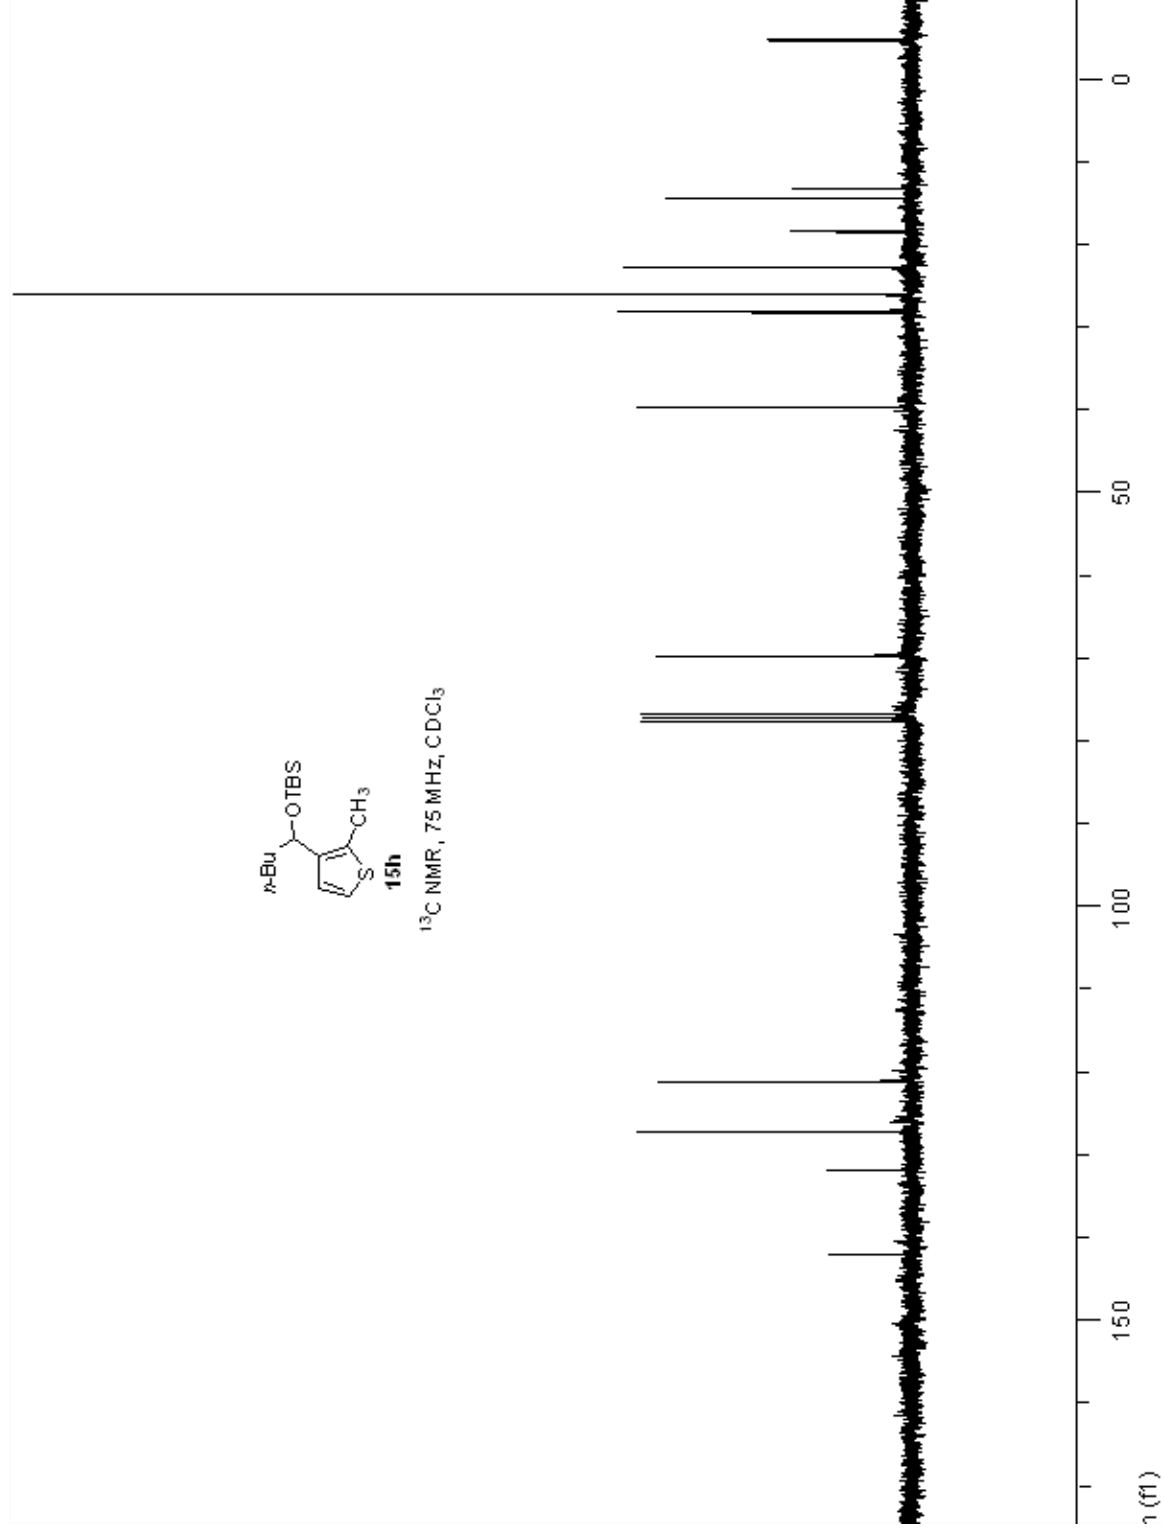

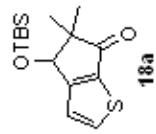

<sup>1</sup>H NMR, 300 MHz, CDCl<sub>3</sub>

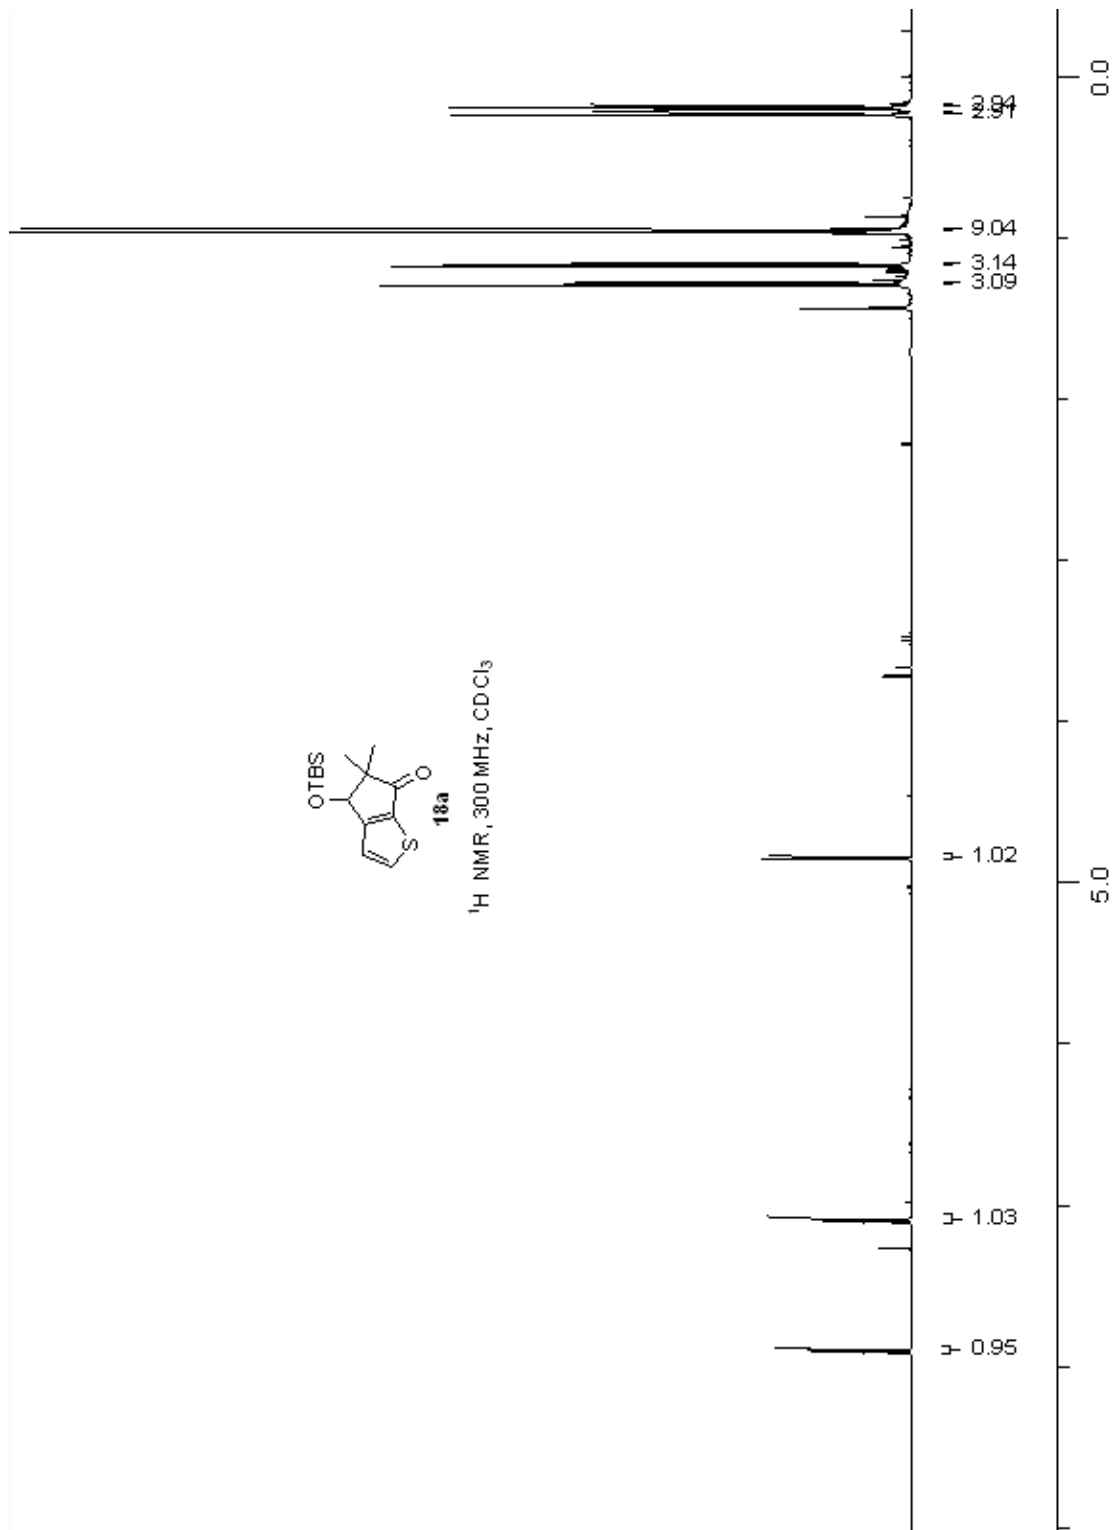

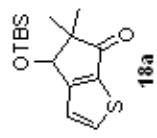

<sup>13</sup>C NMR, 75 MHz, CDCl<sub>3</sub>

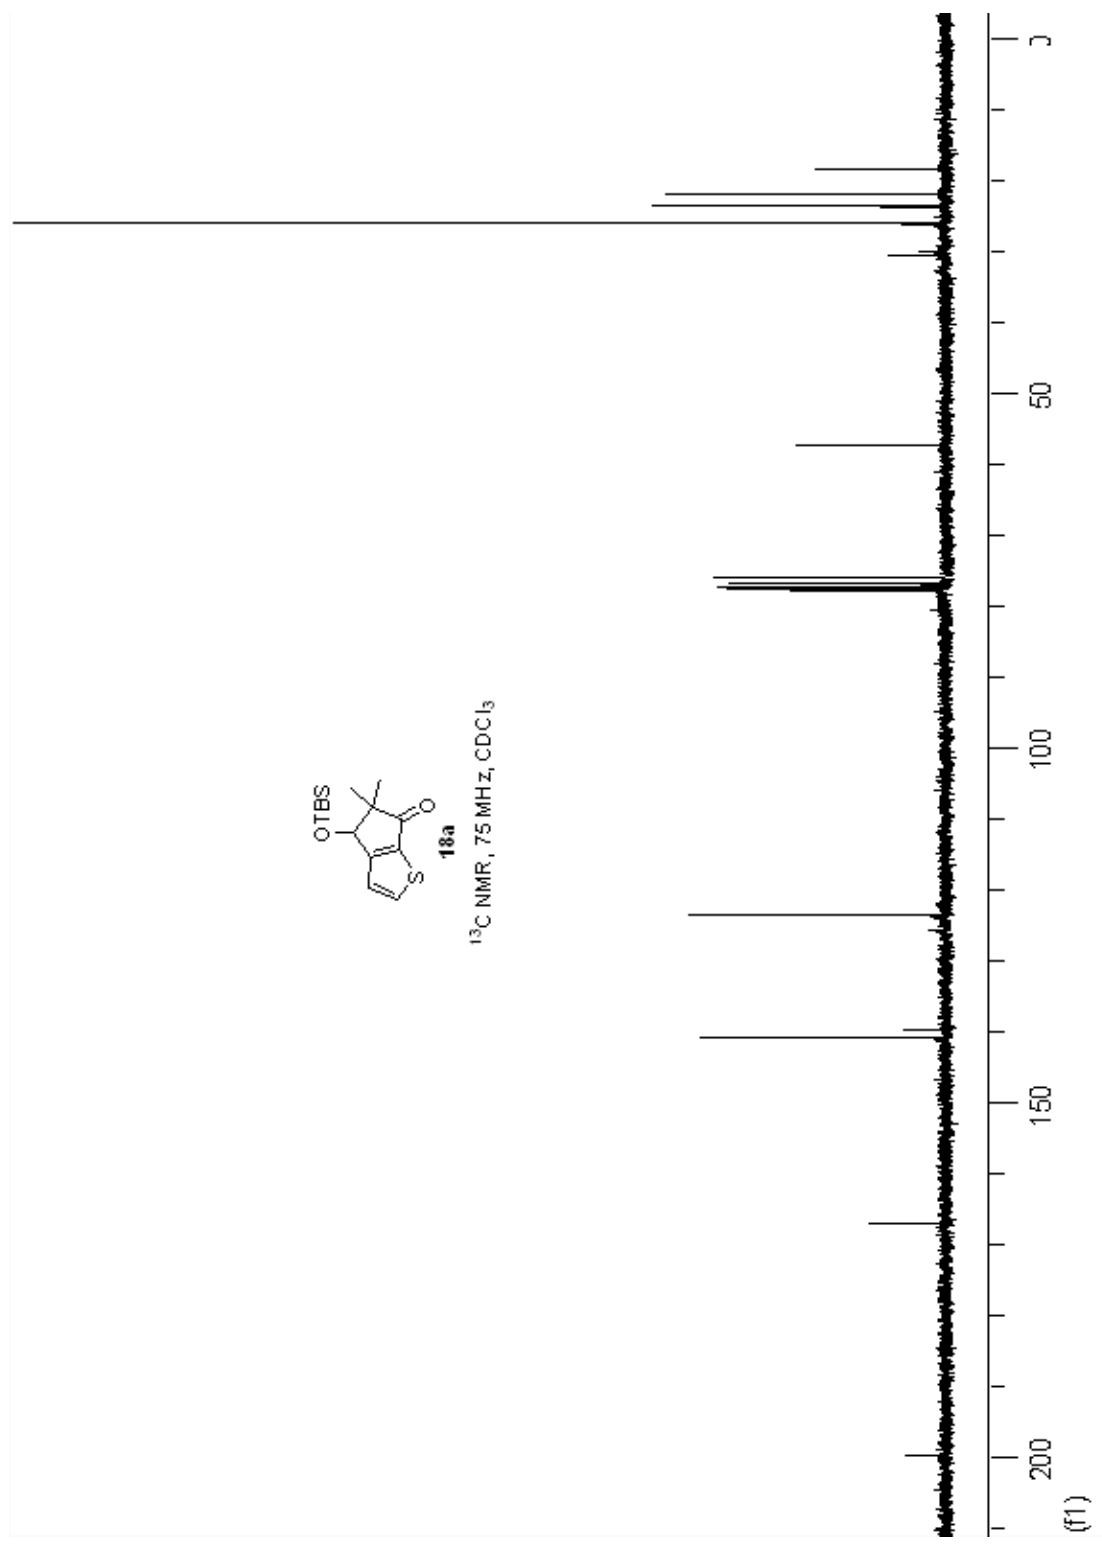





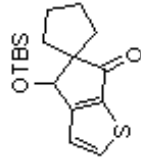

**18b**

$^{13}\text{C}$  NMR, 75 MHz,  $\text{CDCl}_3$

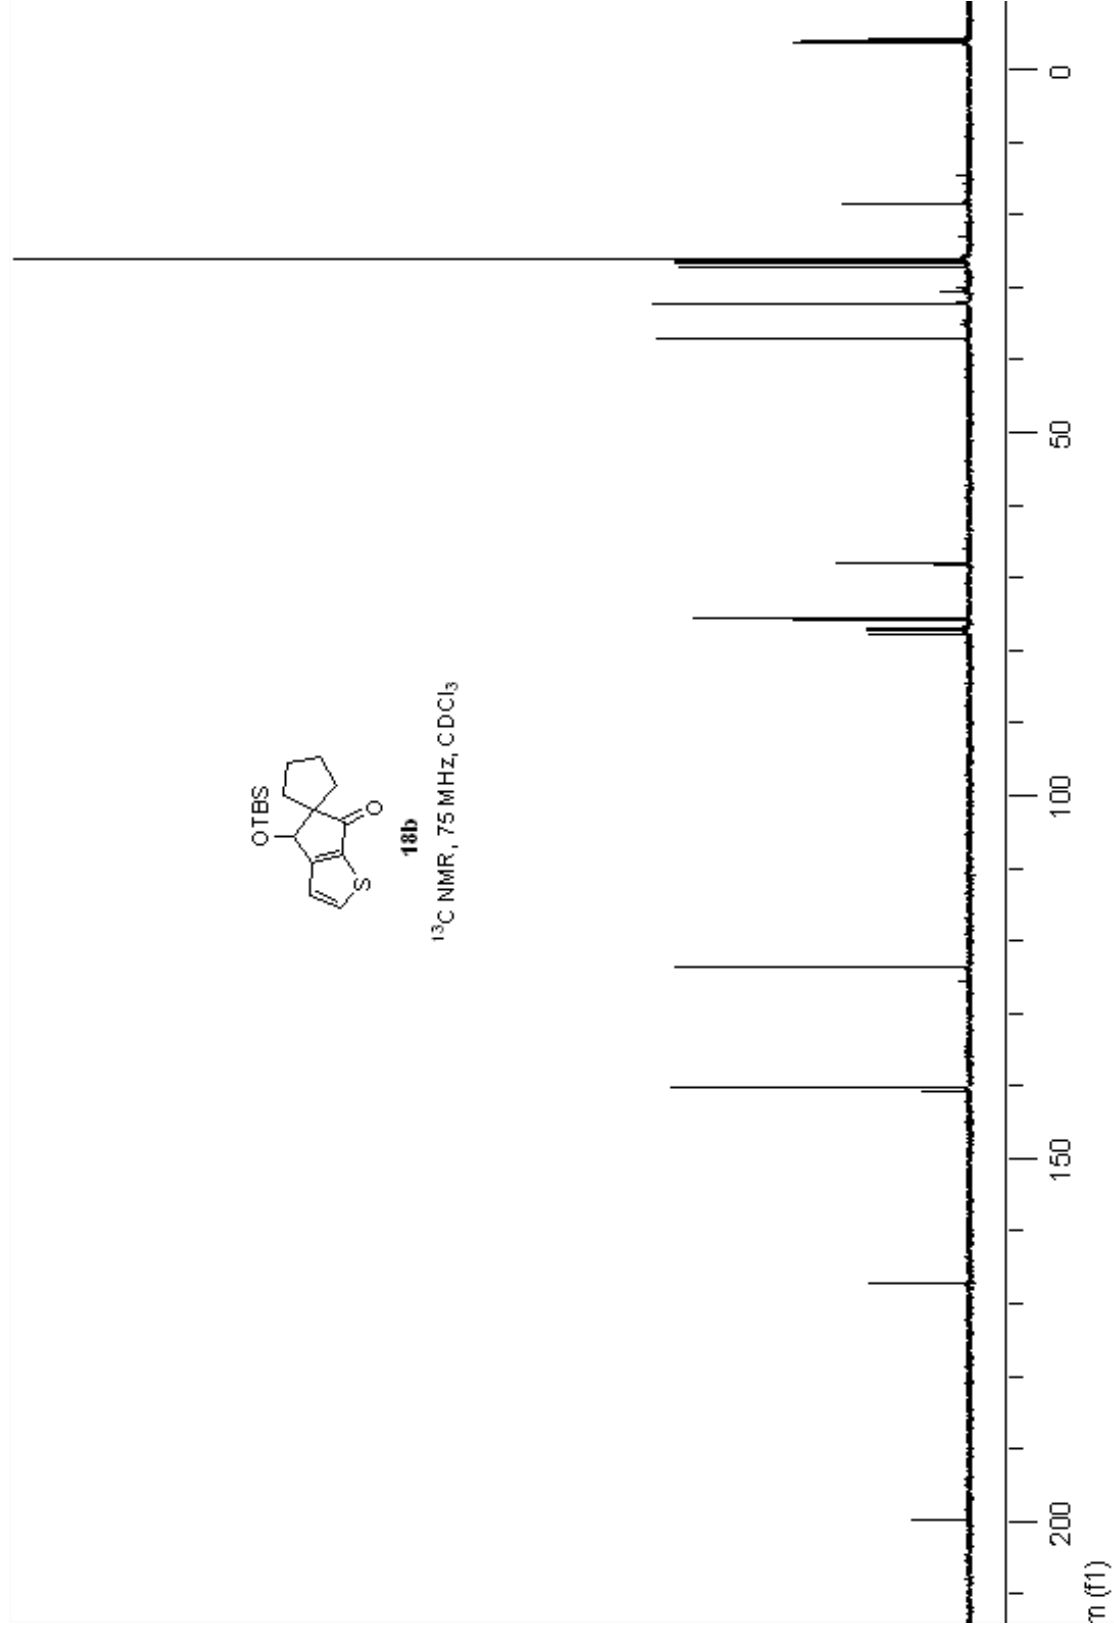

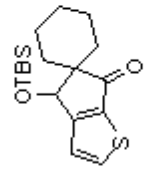

**18c**

<sup>1</sup>H NMR, 300 MHz, CDCl<sub>3</sub>

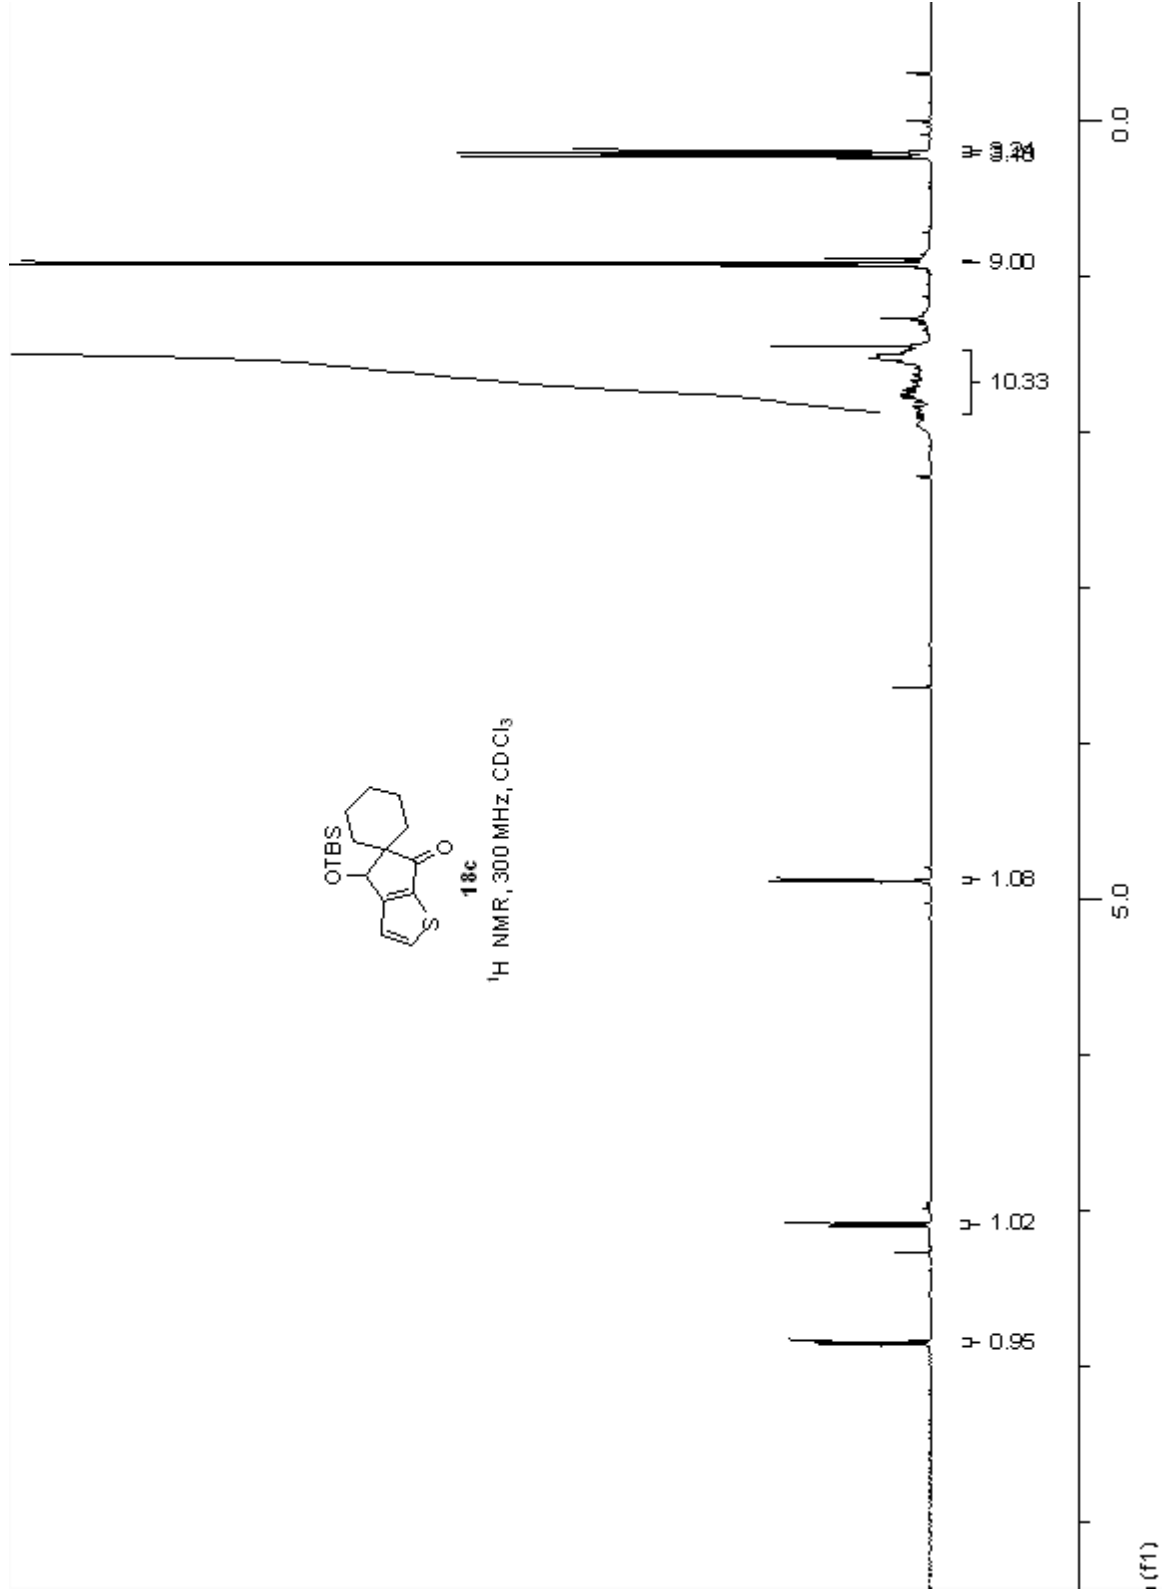

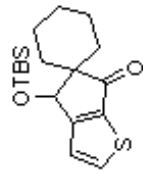

**18c**

$^{13}\text{C}$  NMR, 75 MHz,  $\text{CDCl}_3$

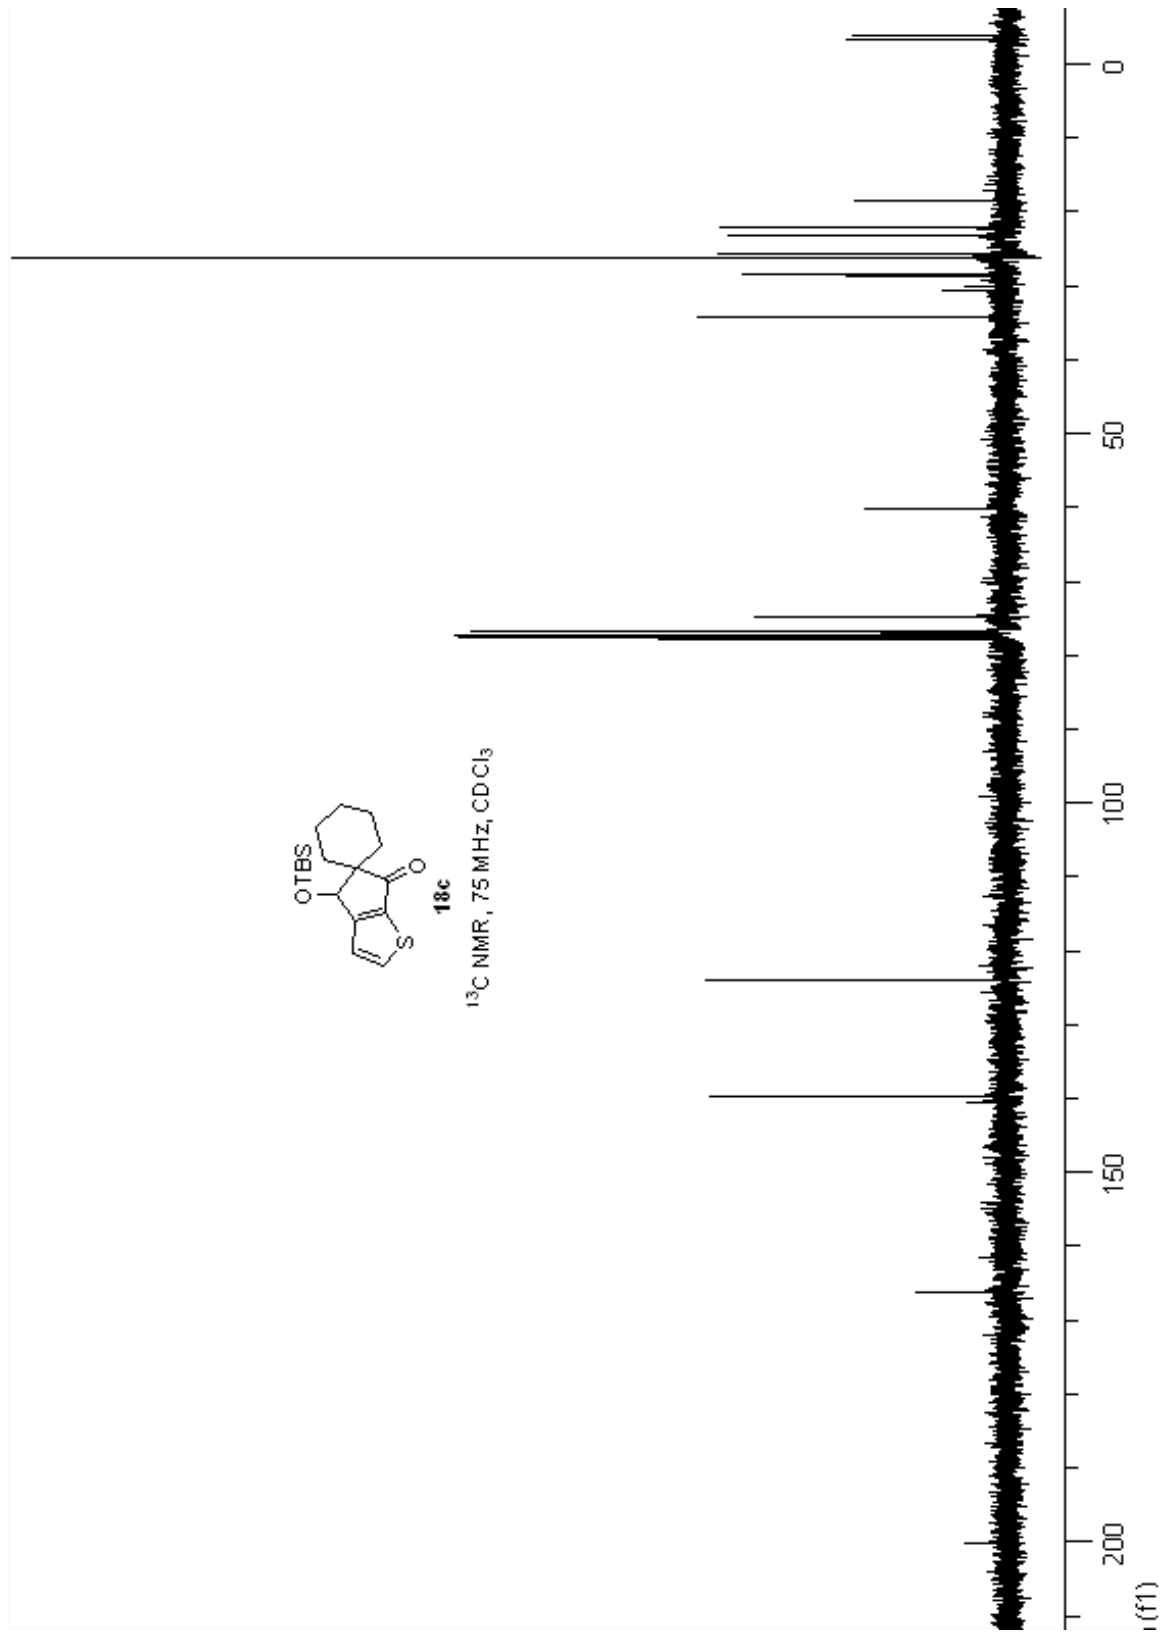

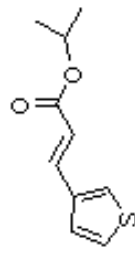

**18d**

<sup>1</sup>H NMR, 300 MHz, CDCl<sub>3</sub>

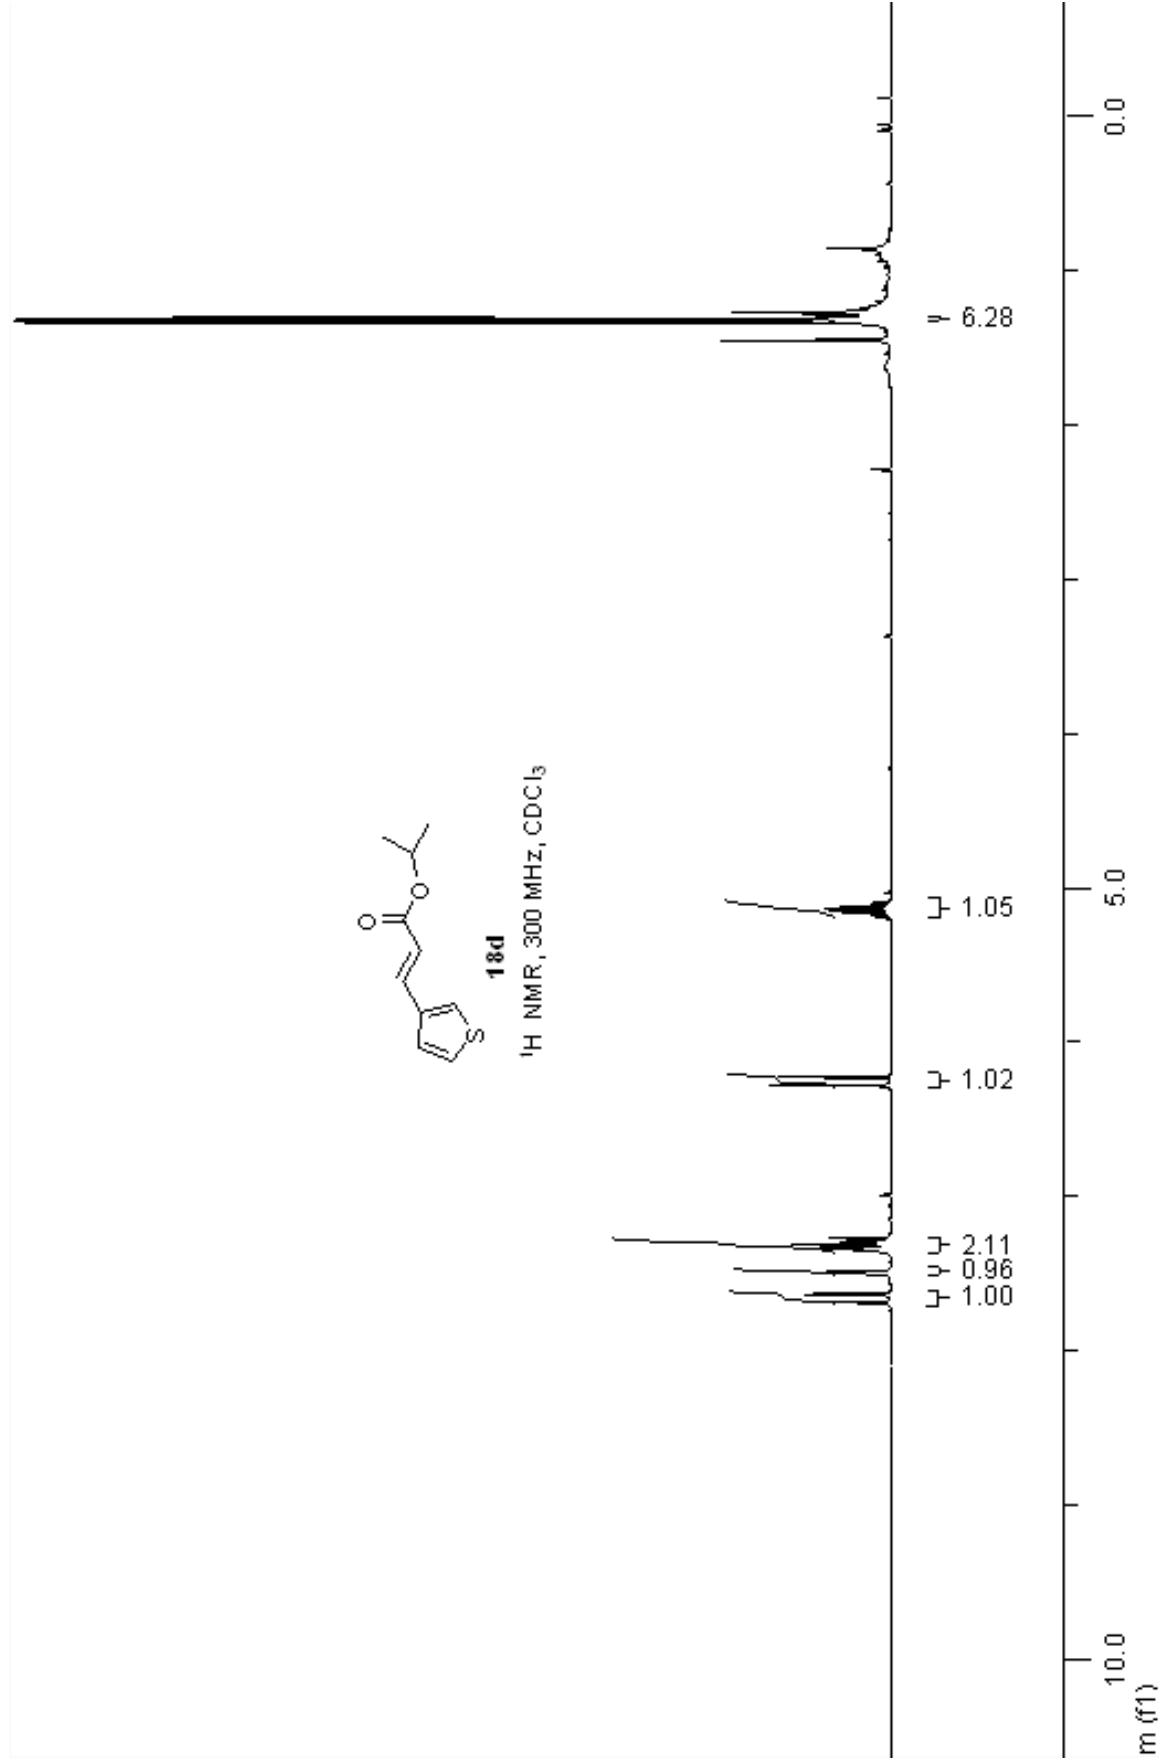

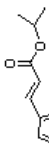

18d

<sup>13</sup>C NMR, 75 MHz, CDCl<sub>3</sub>

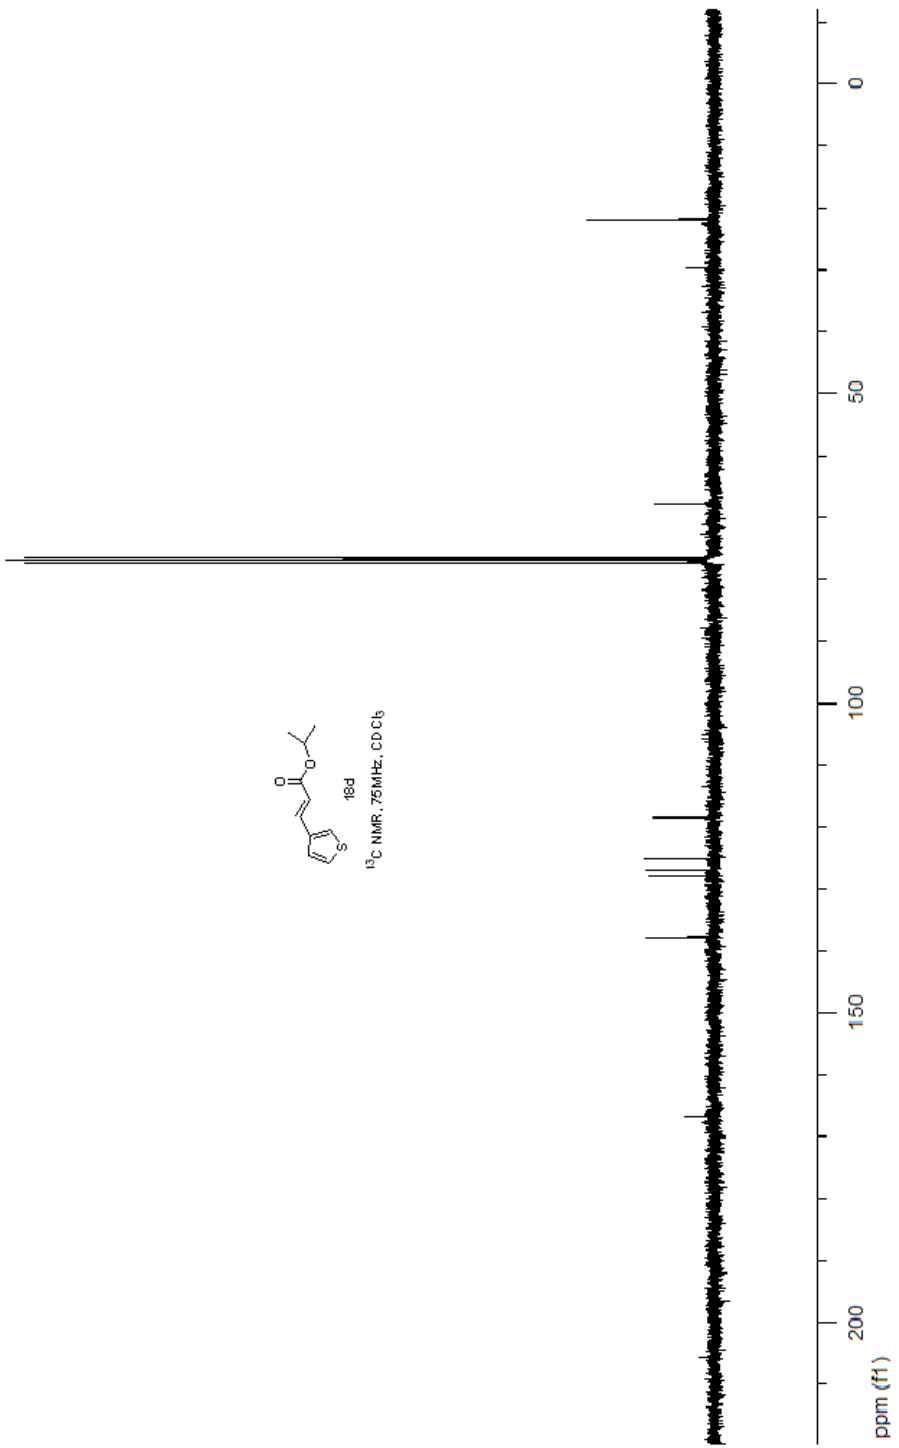

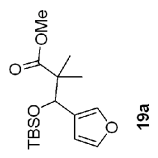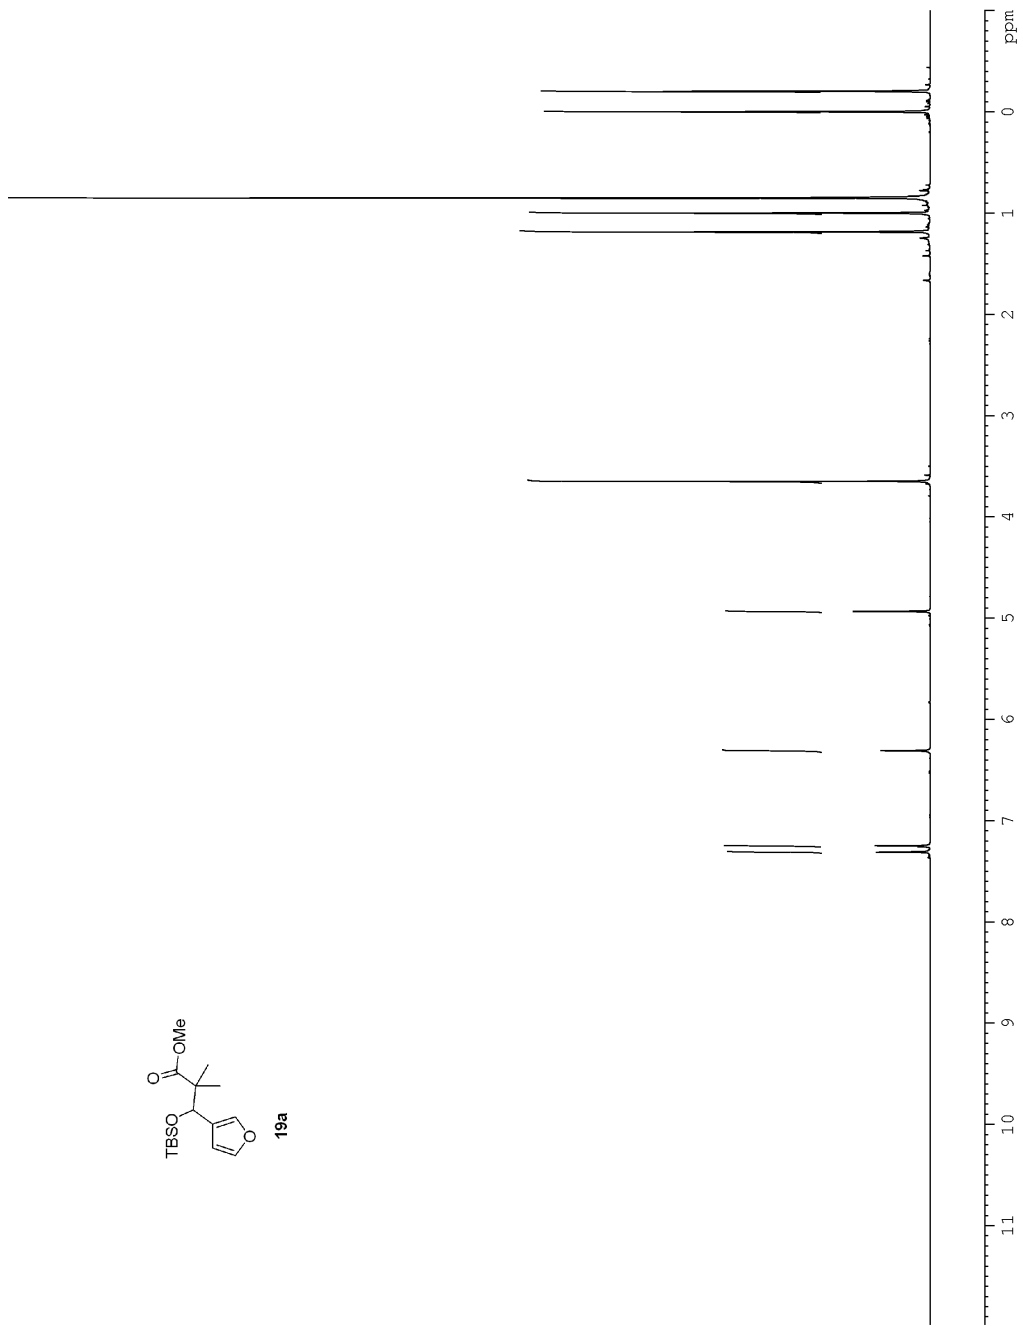

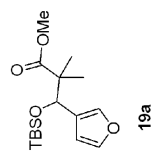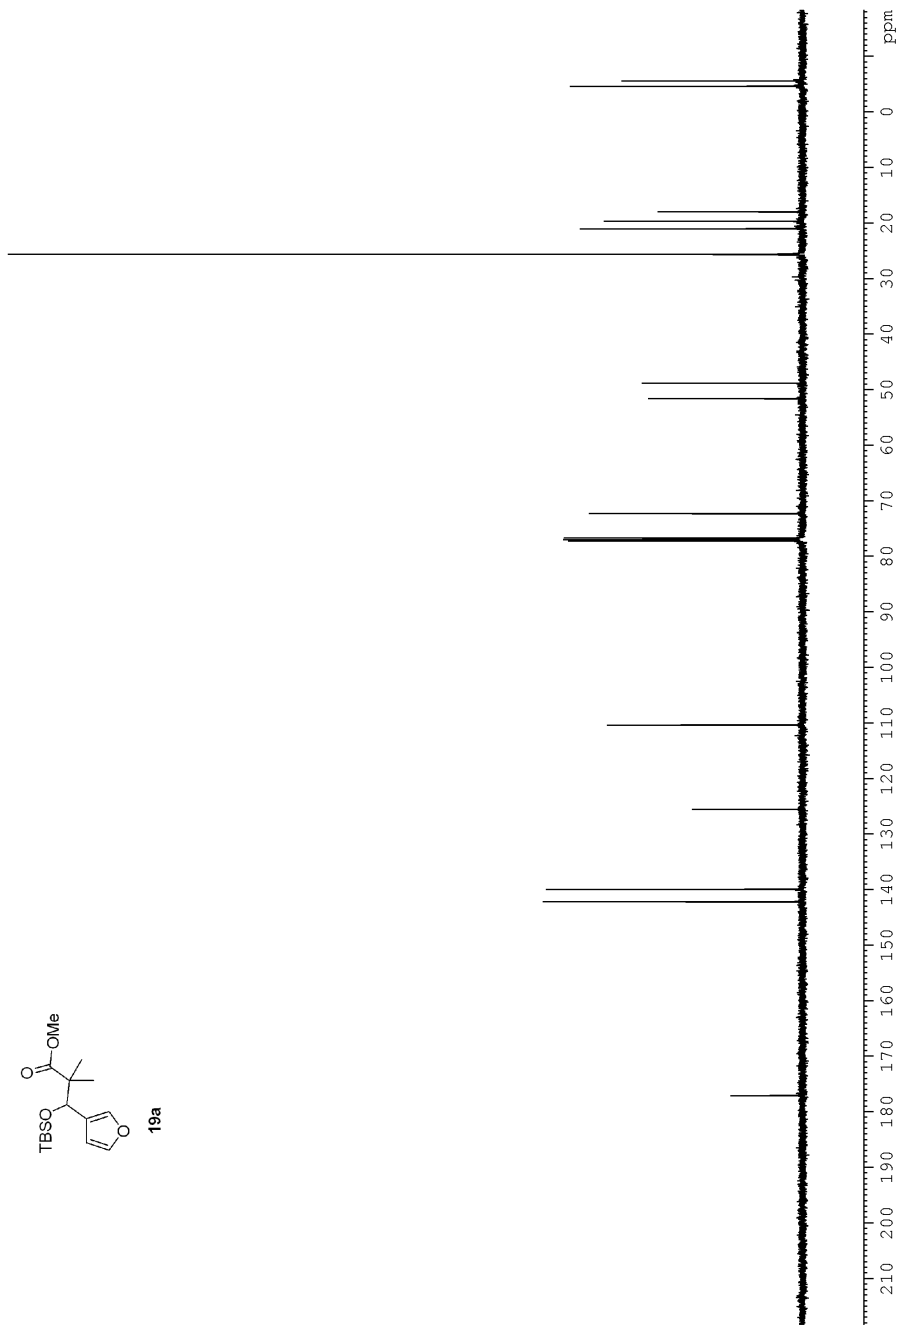



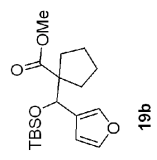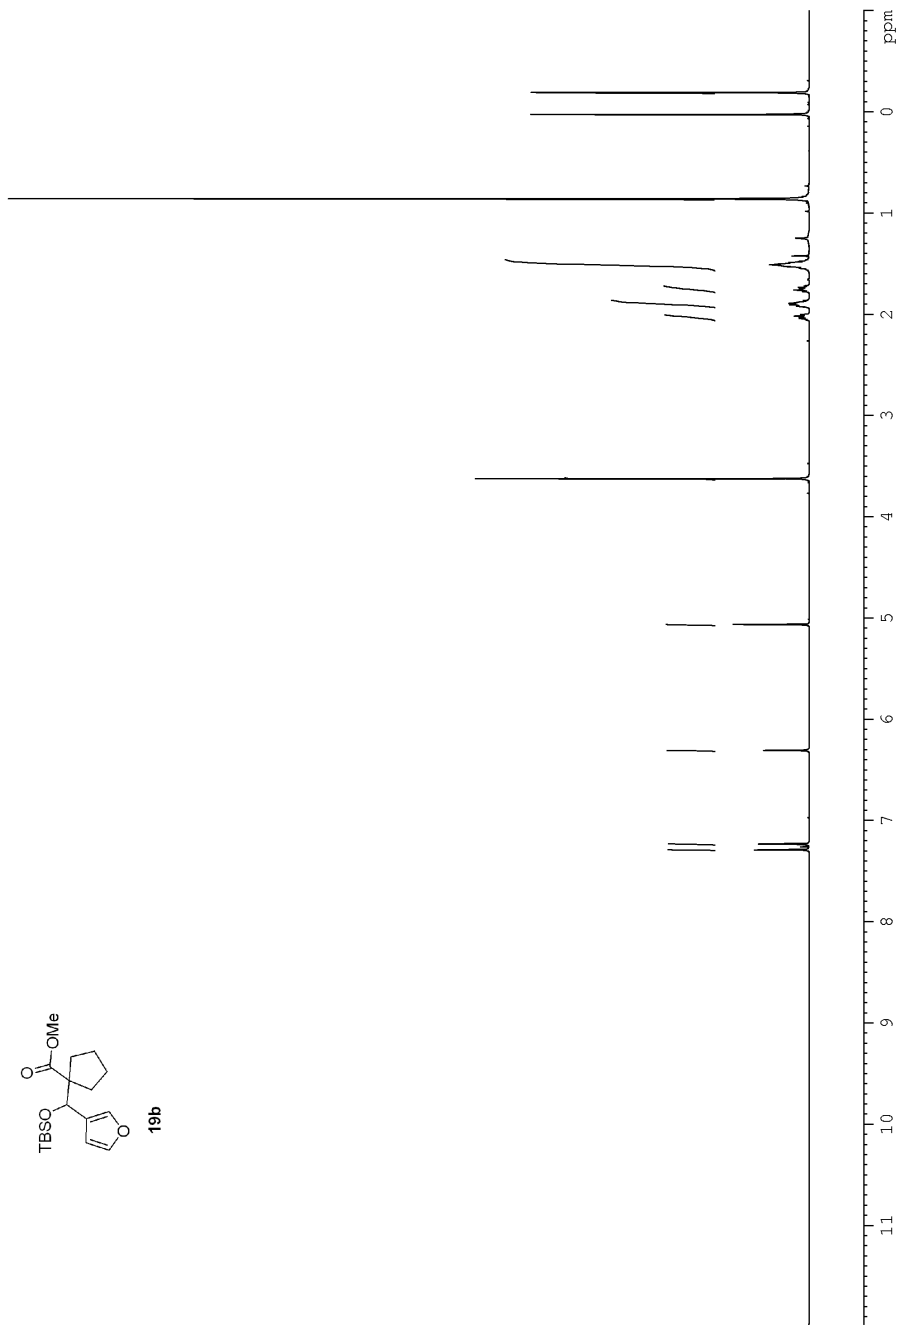

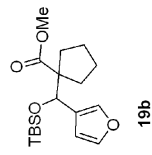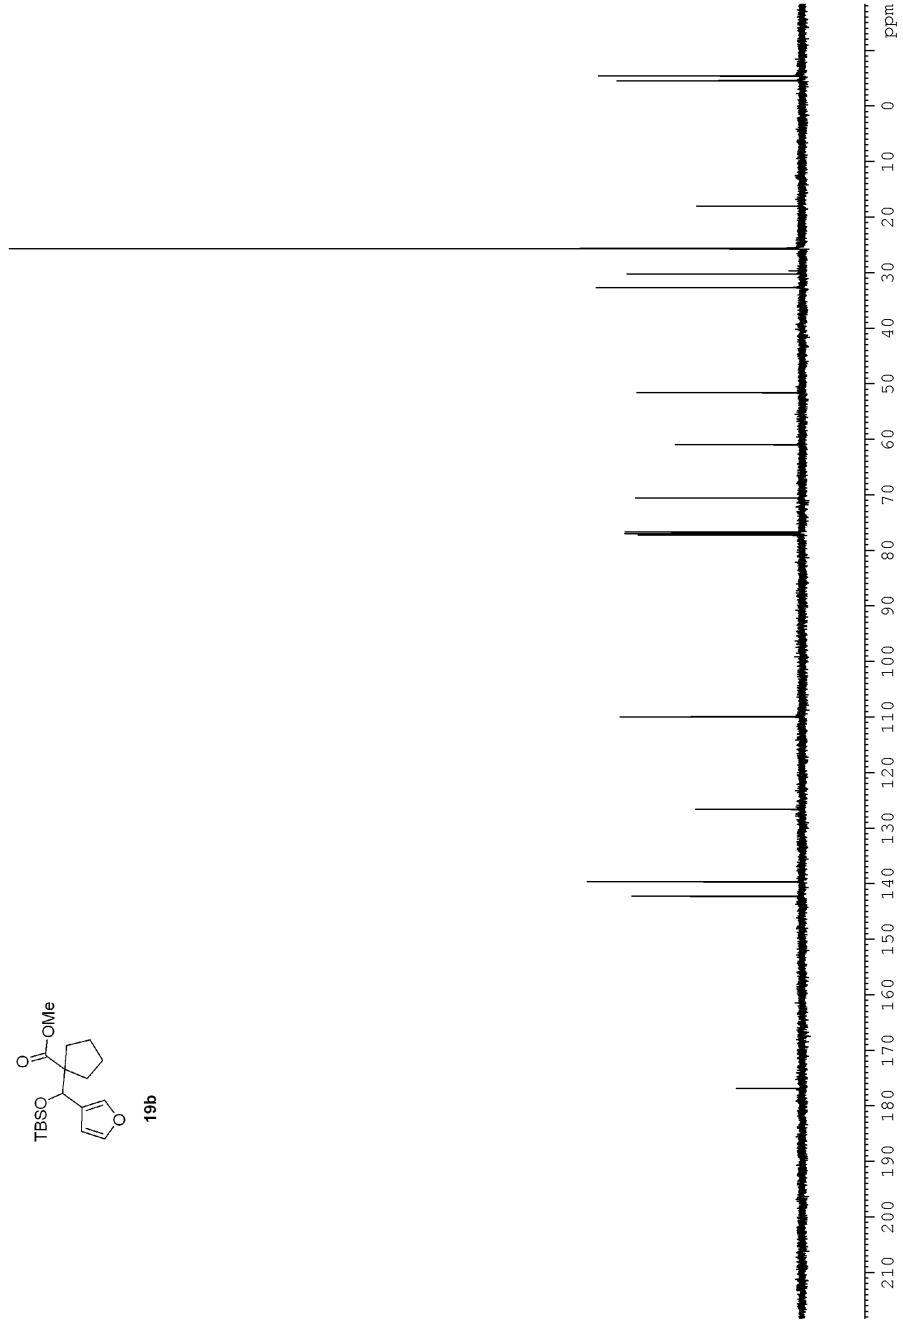

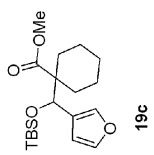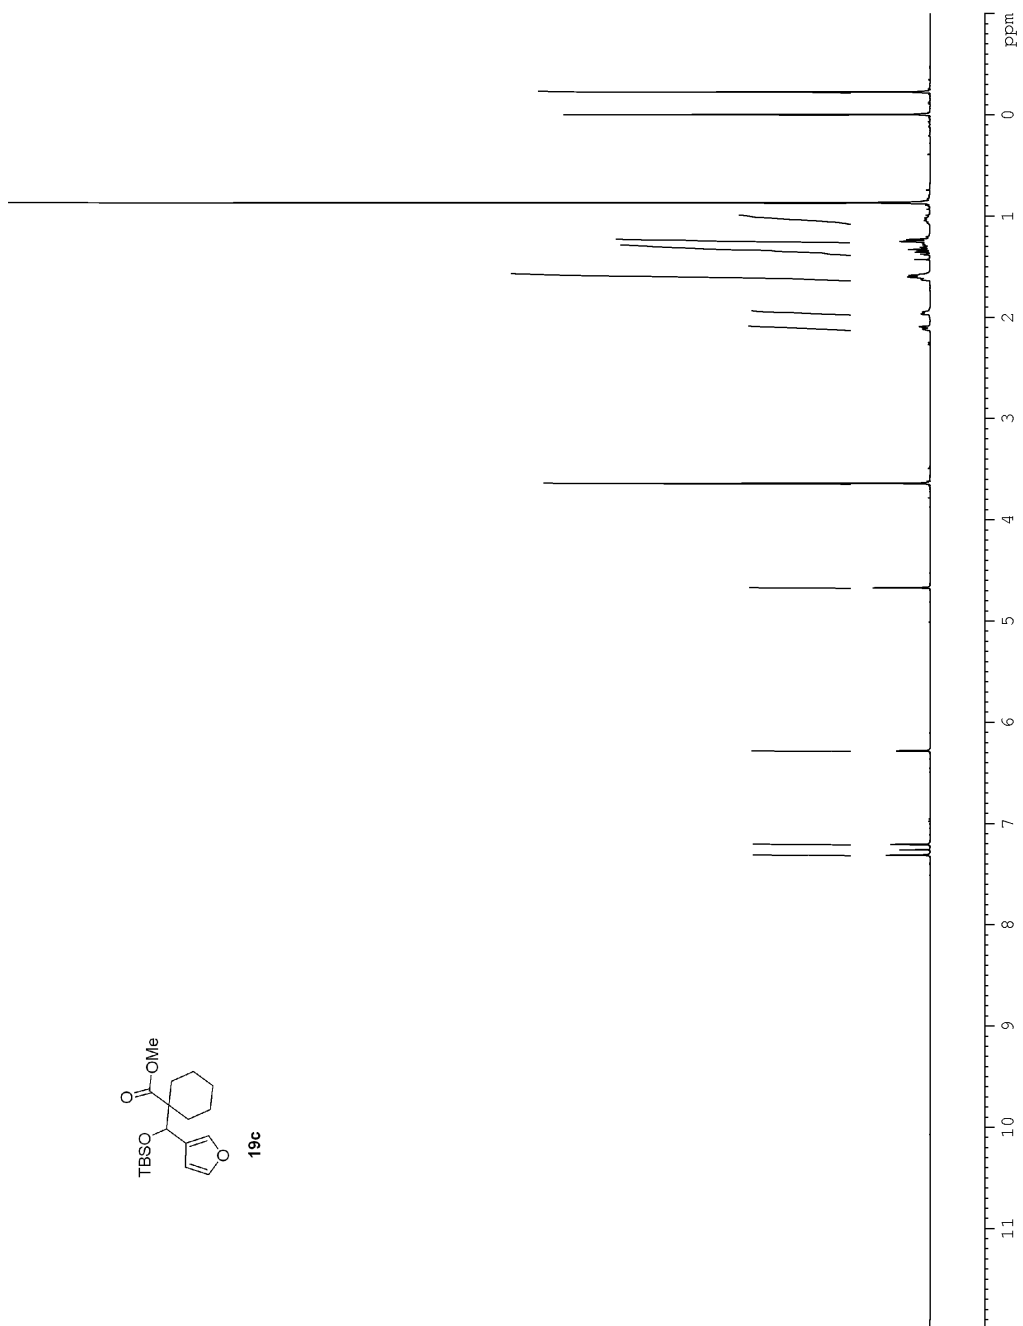

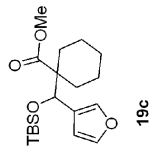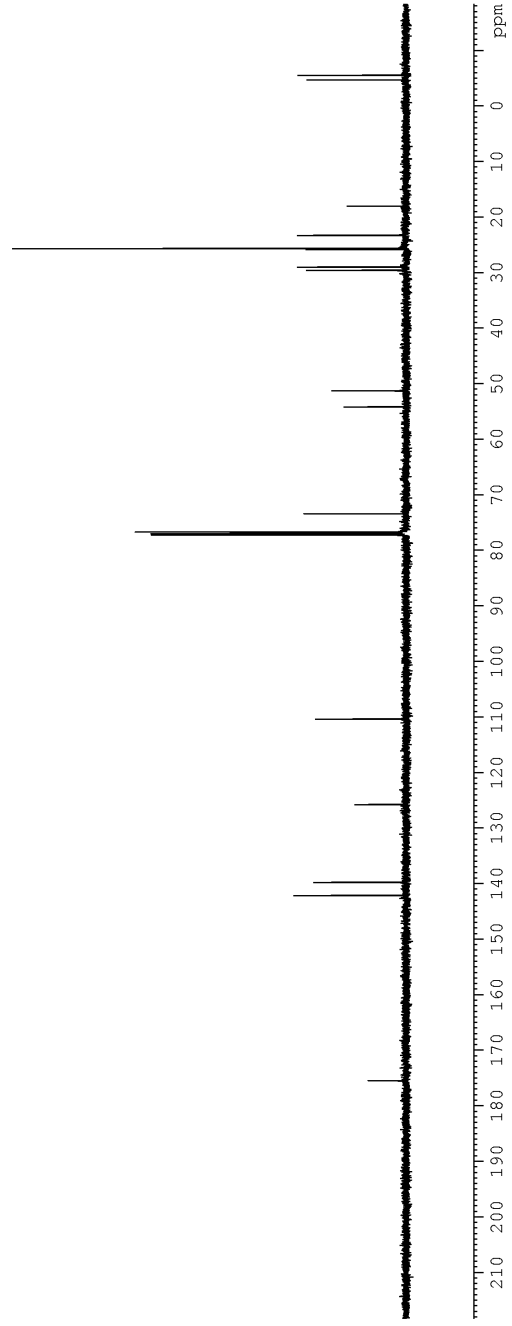

Supplement: NIHMS149962-supplement-002.pdf [file NIHMS149962-supplement-002.pdf]
