# Supplementary material
Source: PubMed Central journal article supplement (PMC2777545)
Supplement: NIHMS149962-supplement-001.pdf [file NIHMS149962-supplement-001.pdf]

Supporting Information

**Multicomponent Type II Anion Relay Chemistry (ARC):  
One-Pot Syntheses of 2, 3-Disubstituted Furans and Thiophenes**

Nelmi O. Devarie-Baez,<sup>1</sup> Won-Suk Kim,<sup>2</sup> Amos B. Smith, III,<sup>2\*</sup> and Ming Xian<sup>1\*</sup>

<sup>1</sup>*Department of Chemistry, Washington State University, Pullman, WA 99164, and*

<sup>2</sup>*Department of Chemistry, University of Pennsylvania, Philadelphia, PA 19104*

**Materials and Methods:** Reactions were carried out in oven or flame-dried glassware under an argon atmosphere, unless otherwise noted. All solvents were reagent grade. Anhydrous diethyl ether and tetrahydrofuran were obtained from a Pure Solve™ PS-400 or distilled from sodium/benzophenone under an argon atmosphere. Reactions were magnetically stirred and monitored by thin layer chromatography (TLC) with 0.25 mm pre-coated silica gel plates. Flash chromatography was performed with silica gel 60 (particle size 0.040 – 0.062mm). Yields refer to chromatographically and spectroscopically pure compounds, unless otherwise stated. Proton and carbon-13 NMR spectra were recorded on 300 and 500 MHz spectrometer. Chemical shifts are reported relative to chloroform ( $\delta$  7.26) for  $^1\text{H}$  NMR and chloroform ( $\delta$  77.0)  $^{13}\text{C}$  NMR.

### Experimental Procedures and Compound Characterization Data

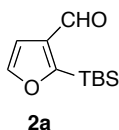

**2a:** To a solution of 2-TBS-3-(hydroxymethyl)-furan<sup>9</sup> (3.34 g, 15.7 mmol) in  $\text{CH}_2\text{Cl}_2$  (150 mL) was added PCC (6.77 g, 31.4 mmol) at rt. After being stirred for 30 min, the reaction mixture was filtered through celite with  $\text{Et}_2\text{O}$ . The filtrate was then evaporated *in vacuo* and the crude oil was purified by flash chromatography (Hexane: $\text{Et}_2\text{O}$  = 100:1) to give the desired product (2.88 g, 87%).  $^1\text{H}$  NMR (500 MHz,  $\text{CDCl}_3$ )  $\delta$  10.07 (s, 1H), 7.63 (d,  $J=2.0\text{Hz}$ , 1H), 6.81 (d,  $J=2.0\text{ Hz}$ , 1H), 0.93 (s, 9H), 0.39 (s, 6H)  $^{13}\text{C}$  NMR (125 MHz,  $\text{CDCl}_3$ )  $\delta$  186.2, 170.3, 147.6, 138.5, 107.4,

26.2, 17.1, -5.5; IR (neat,  $\text{cm}^{-1}$ ) 2931, 2859, 1685, 1468, 1255; HRMS ( $\text{ES}^+$ )  $m/z$  233.0969,  $[(\text{M}+\text{Na})^+]$ ; calcd for  $\text{C}_{11}\text{H}_{18}\text{NaO}_2\text{Si}$ : 233.0974].

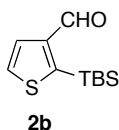

**2b**: 3-Bromo-2-*t*-butyldimethylsilyl thiophene<sup>6</sup> (1.00 g, 3.61 mmol) in  $\text{Et}_2\text{O}$  (20 mL) was cooled to  $-78^\circ\text{C}$ . To this mixture was added *t*-BuLi (2.35 mL, 1.7 M in pentane, 3.97 mmol) dropwise *via* syringe. The mixture was stirred at  $-78^\circ\text{C}$  for 30 min, before a solution of DMF in  $\text{Et}_2\text{O}$  (316 mg/3 mL, 4.33 mmol) was added *via* syringe over 3 min. The reaction mixture was allowed to warm to rt and stir for 3 h. The reaction was then quenched with a saturated solution of  $\text{NH}_4\text{Cl}$ , and the mixture was extracted with  $\text{Et}_2\text{O}$ . The combined organic layers were washed with water (3 times), then dried over  $\text{MgSO}_4$  and concentrated *in vacuo*. The crude oil was purified by flash chromatography (Hexane: $\text{EtOAc}$  = 100:1) to give the product (790 mg, 97%).  $^1\text{H}$  NMR (300 MHz,  $\text{CDCl}_3$ )  $\delta$  10.06 (d,  $J$  = 0.6 Hz, 1H), 7.75 (d,  $J$  = 4.8 Hz, 1H), 7.67 (dd,  $J$  = 4.8 Hz, 0.9 Hz, 1H), 0.94 (s, 9H), 0.47 (s, 6H);  $^{13}\text{C}$  NMR (75 MHz,  $\text{CDCl}_3$ )  $\delta$  186.2, 150.8, 149.1, 131.0, 128.2, 26.4, 17.2, -3.4; IR (neat,  $\text{cm}^{-1}$ ) 2928, 2856, 1686, 1470, 1253; HRMS ( $\text{ES}^+$ )  $m/z$  227.0932,  $[(\text{M}+\text{H})^+]$ ; calcd for  $\text{C}_{11}\text{H}_{19}\text{OSSi}$ : 227.0926].

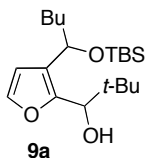

### General procedure for the three-component coupling reactions of furans:

**Preparation of 9a from 2a in one pot:** Compound **2a** (101 mg, 0.48 mmol) in  $\text{Et}_2\text{O}$  (1 mL) was cooled to  $-78^\circ\text{C}$ . To this solution was added *n*-BuLi (0.25 mL, 2.1 M in hexanes, 0.53 mmol) dropwise *via* syringe. The mixture was stirred at  $-78^\circ\text{C}$  for 30 min. Then, a solution of

pivaldehyde (62.0 mg, 0.72 mmol) in HMPA/Et<sub>2</sub>O (1 mL/1 mL) was added quickly at -78 °C. The reaction mixture was slowly warmed to rt for 3h. The reaction was quenched with a saturated aqueous solution of NH<sub>4</sub>Cl, and extracted with Et<sub>2</sub>O. The combined organic layers were washed with brine, dried over anhydrous MgSO<sub>4</sub>, concentrated *in vacuo*. The residue was purified by flash chromatography (Hexane:EtOAc = 40:1) to give a 1:0.96 diastereomeric mixture of **9a** (133.6 mg, 78%); <sup>1</sup>H NMR (500 MHz, CDCl<sub>3</sub>) δ 7.28 (d, *J*=2.0 Hz, 1H), 7.26 (d, *J*=1.5 Hz, 1H), 6.35 (d, *J*=2.0 Hz, 1H), 6.33 (d, *J*=1.5 Hz, 1H), 4.70 (t, *J*=6.5 Hz, 1H), 4.60 (dd, *J*=9.0, 4.5 Hz, 1H), 4.36 (d, *J*=5.0 Hz, 1H), 4.32 (d, *J*= 5.5 Hz, 1H), 2.18 (d, *J*=6.0 Hz, 1H), 1.99 (d, *J*=6.0 Hz, 1H), 1.76-1.67 (m, 2H), 1.59-1.50 (m, 2H), 1.49-1.41 (m, 1H), 1.36-1.23 (m, 7H), 1.12 (s, 9H), 0.98 (s, 9H), 0.90-0.87 (m, 15H), 0.85 (s, 9H), 0.05 (s, 3H), 0.04 (s, 3H), -0.07 (s, 3H), -0.11 (s, 3H); <sup>13</sup>C NMR (125 MHz, CDCl<sub>3</sub>) δ 148.8 (2C), 141.0, 140.7, 127.1, 126.8, 109.9, 109.7, 74.3, 74.1, 67.8, 66.8, 40.1, 39.2, 36.4, 36.3, 28.2, 27.7, 26.4, 26.3, 25.8, 25.7, 22.6, 22.4, 18.1 (2C), 14.0 (2C), -4.5, -4.7, -4.8, -5.0; IR (neat, cm<sup>-1</sup>) 3481, 2955, 2860, 1468, 1391, 1254, 1084; HRMS (ES<sup>+</sup>) *m/z* 377.2480, [(M+Na)<sup>+</sup>; calcd for C<sub>20</sub>H<sub>38</sub>NaO<sub>3</sub>Si: 377.2488].

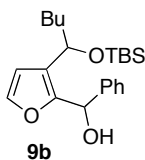

**9b** was prepared in an analogous method as **9a**. Isolated yield: 73% (dr 1:0.93); <sup>1</sup>H NMR (500 MHz, CDCl<sub>3</sub>) δ 7.43-7.41 (m, 4H), 7.39-7.36 (m, 4H), 7.32-7.28 (m, 4H), 6.34-6.33 (m, 2H), 5.94 (br, 1H), 5.89 (br, 1H), 4.71 (t, *J*= 6.5 Hz, 1H), 4.62 (t, *J*= 6.5 Hz, 1H), 3.68 (br, 1H), 3.22 (br, 1H), 1.77- 1.73 (m, 2H), 1.66-1.59 (m, 2H), 1.33-1.23 (m, 8H), 0.91-0.90 (m, 12H), 0.88-0.85 (m, 12H), 0.09 (s, 3H), 0.06 (s, 3H), -0.03 (s, 3H), -0.07 (s, 3H); <sup>13</sup>C NMR (125 MHz,

CDCl<sub>3</sub>)  $\delta$  149.7, 149.3, 141.54, 141.52, 141.1, 140.9, 128.3, 128.2, 127.6 (2C), 126.6, 126.5, 126.1, 125.7, 110.6, 110.4, 69.2, 69.0, 68.32, 68.29, 39.7, 39.6, 27.9, 27.8, 25.8, 25.7, 22.5, 22.4, 18.14, 18.12, 14.0, 13.9, -4.7, -4.8, -5.0, -5.1; IR (neat, cm<sup>-1</sup>) 3407, 2955, 2857, 1463, 1361, 1254, 1083; HRMS (ES<sup>+</sup>)  $m/z$  397.2187 [(M+Na)<sup>+</sup>; calcd for C<sub>22</sub>H<sub>34</sub>O<sub>3</sub>NaSi: 397.2175].

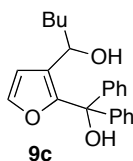

**9c:** Compound **2a** (110 mg, 0.52 mmol) in Et<sub>2</sub>O (1 mL) was cooled to -78 °C. To this solution was added *n*-BuLi (0.27 mL, 2.1 M in hexanes, 0.57 mmol) dropwise *via* syringe. The mixture was stirred at -78 °C for 30 min before a solution of acetophenone (142.1 mg, 0.78 mmol) in HMPA/Et<sub>2</sub>O (1 mL/1 mL) was added quickly at -78 °C. The reaction mixture was slowly warmed to rt for 3h. The reaction was quenched with a saturated aqueous solution of NH<sub>4</sub>Cl, and extracted with Et<sub>2</sub>O. The combined organic layers were washed with brine, dried over anhydrous MgSO<sub>4</sub> and concentrated *in vacuo*. The residue was dissolved in THF (2 mL) and treated with TBAF (0.78 mL, 0.78 mmol) for 30 min at rt. The reaction mixture was then quenched with H<sub>2</sub>O and extracted with Et<sub>2</sub>O. After drying with anhydrous MgSO<sub>4</sub> and evaporation of the solvent, the residue was purified by flash chromatography (Hexane:EtOAc = 7:1) to give **9c** (133.2 mg, 76%); <sup>1</sup>H NMR (500 MHz, CDCl<sub>3</sub>)  $\delta$  7.36-7.29 (m, 10H), 7.28 (d,  $J$ = 1.5 Hz, 1H), 6.35 (d,  $J$ = 1.5 Hz, 1H), 4.40 (t,  $J$ = 6.5 Hz, 1H), 1.74-1.65 (m, 2H), 1.35-1.23 (m, 5H), 1.20-1.14 (m, 1H), 0.89 (t,  $J$ = 7.0 Hz, 3H); <sup>13</sup>C NMR (125 MHz, CDCl<sub>3</sub>)  $\delta$  153.2, 145.6, 145.2, 140.0, 127.9, 127.8, 127.6, 127.56, 127.54, 127.3, 125.0, 110.4, 78.8, 67.2, 37.0, 27.9, 22.4, 13.9; IR (neat, cm<sup>-1</sup>) 3345, 2955, 2859, 1448, 1379, 1175, 1107; HRMS (ES<sup>+</sup>)  $m/z$  359.1635 [(M+Na)<sup>+</sup>; calcd for C<sub>22</sub>H<sub>24</sub>NaO<sub>3</sub>: 359.1647].

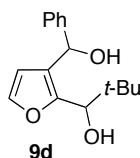

**9d** was prepared in an analogous method as **9c**. Isolated yield: 83% (dr 1:0.90);  $^1\text{H}$  NMR (500 MHz,  $\text{CDCl}_3$ )  $\delta$  7.41-7.33 (m, 8H), 7.31-7.24 (m, 3H), 7.23 (s, 1H), 6.16 (d,  $J=2.0$  Hz, 1H), 6.08 (d,  $J=1.5$  Hz, 1H), 5.93 (s, 1H), 5.78 (s, 1H), 4.50 (s, 1H), 4.48 (s, 1H), 3.39 (br, 4H), 1.00 (s, 9H), 1.00 (s, 9H);  $^{13}\text{C}$  NMR (125 MHz,  $\text{CDCl}_3$ )  $\delta$  151.5, 151.3, 143.0, 142.9, 141.3, 140.6, 128.35, 128.33, 127.5, 127.4, 126.2 (2C), 125.1, 124.7, 110.4, 109.7, 76.0, 73.9, 68.5, 67.8, 36.6, 36.1, 26.3, 26.0; IR (neat,  $\text{cm}^{-1}$ ) 3373, 3063, 2956, 2870, 1480, 1363, 1240, 1045; HRMS ( $\text{ES}^+$ )  $m/z$  283.1316,  $[(\text{M}+\text{Na})^+]$ ; calcd for  $\text{C}_{16}\text{H}_{20}\text{NaO}_3$ : 283.1310].

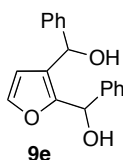

**9e** was prepared in an analogous method as **9c**. Isolated yield: 74% (dr 1:0.81);  $^1\text{H}$  NMR (500 MHz,  $\text{CDCl}_3$ )  $\delta$  7.40-7.27 (m, 20H), 7.24 (s, 1H), 7.23 (s, 1H), 6.13 (d,  $J=1.5$  Hz, 1H), 6.10 (d,  $J=1.5$  Hz, 1H), 5.93 (s, 1H), 5.93 (s, 1H), 5.85 (s, 1H), 5.79 (s, 1H), 3.97 (br, 2H), 3.47 (br, 2H);  $^{13}\text{C}$  NMR (125 MHz,  $\text{CDCl}_3$ )  $\delta$  151.6, 151.0, 142.8, 142.7, 141.6, 141.2, 141.1, 140.9, 128.44, 128.43, 128.38, 128.36, 127.72, 127.70, 127.6 (2C), 126.4, 126.2 (3C), 124.5, 124.2, 110.9, 110.4, 69.5, 69.0, 68.73, 68.70; IR (neat,  $\text{cm}^{-1}$ ) 3360, 3061, 2923, 1494, 1245, 1012; HRMS ( $\text{ES}^+$ )  $m/z$  263.1069,  $[(\text{M}-\text{OH})^+]$ ; calcd for  $\text{C}_{18}\text{H}_{15}\text{O}_2$ : 263.1072].

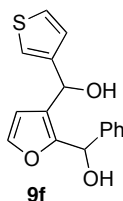

**9f** was prepared in an analogous method as **9c**. Isolated yield: 62% (dr 1:0.97);  $^1\text{H}$  NMR (500 MHz,  $\text{CDCl}_3$ )  $\delta$  7.37-7.30 (m, 10H), 7.28-7.26 (m, 4H), 7.13 (s, 2H), 6.97-6.94 (m, 2H), 6.21 (d,  $J=2.0$  Hz, 1H), 6.19 (d,  $J=2.0$  Hz, 1H), 5.90-5.88 (m, 3H), 5.84 (s, 1H), 3.96 (br, 2H), 3.62 (br, 2H);  $^{13}\text{C}$  NMR (125 MHz,  $\text{CDCl}_3$ )  $\delta$  151.4, 150.8, 144.3 (2C), 141.6, 141.2, 141.0, 140.8, 128.4 (2C), 127.8, 127.7, 126.3 (2C), 126.22, 126.21, 126.18, 126.15, 124.1, 123.9, 121.5, 121.4, 110.7, 110.3, 69.4, 68.6, 65.4, 65.2; IR (neat,  $\text{cm}^{-1}$ ) 3360, 3030, 2886, 1451, 1416, 1242, 1015; HRMS( $\text{ES}^-$ )  $m/z$  285.0571,  $[(\text{M}-\text{H})^-]$ ; calcd for  $\text{C}_{16}\text{H}_{13}\text{O}_3\text{S}$ : 285.0585].

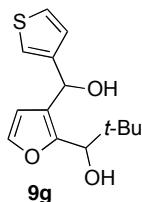

**9g** was prepared in an analogous method as **9c**. Isolated yield: 65% (dr 1:0.87);  $^1\text{H}$  NMR (500 MHz,  $\text{CDCl}_3$ )  $\delta$  7.31-7.26 (m, 4H), 7.22-7.21 (m, 1H), 7.19-7.18 (m, 1H), 7.04 (dd,  $J=5.0$ , 1.0 Hz, 1H), 7.02 (dd,  $J=5.0$ , 1.0 Hz, 1H), 6.28 (d,  $J=2.0$  Hz, 1H), 6.19 (d,  $J=1.5$  Hz, 1H), 5.98 (s, 1H), 5.87 (s, 1H), 4.49 (s, 1H), 4.46 (s, 1H), 2.91 (br, 4H), 0.99 (s, 9H), 0.97 (s, 9H);  $^{13}\text{C}$  NMR (125 MHz,  $\text{CDCl}_3$ )  $\delta$  151.3, 151.0, 144.5, 144.4, 141.4, 140.8, 126.3, 126.28, 126.1 (2C), 124.7, 124.4, 121.5, 121.3, 110.2, 109.7, 75.9, 74.3, 65.3, 64.8, 36.6, 36.2, 26.2, 26.0; IR (neat,  $\text{cm}^{-1}$ ) 3375, 2956, 2906, 1477, 1238, 1045; HRMS( $\text{ES}^-$ )  $m/z$  265.0903,  $[(\text{M}-\text{H})^-]$ ; calcd for  $\text{C}_{14}\text{H}_{17}\text{O}_3\text{S}$ : 265.0898].

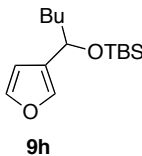

**9h**: Compound **2a** (105 mg, 0.50 mmol) in Et<sub>2</sub>O (1 mL) was cooled to –78 °C. To this solution was added *n*-BuLi (0.26 mL, 2.1 M in hexanes, 0.55 mmol) dropwise *via* syringe. The mixture was stirred at –78 °C for 30 min before a solution of isobutyraldehyde (54.0 mg, 0.75 mmol) in HMPA/Et<sub>2</sub>O (1 mL/1 mL) was added quickly at –78 °C. The reaction mixture was slowly warmed to rt for 3h. The reaction was quenched with a saturated aqueous solution of NH<sub>4</sub>Cl, extracted with Et<sub>2</sub>O. The combined organic layers were washed with brine, dried over anhydrous MgSO<sub>4</sub>, concentrated *in vacuo*. The residue was purified by flash chromatography (Hexane:EtOAc = 200:1) to give **9h** (109.6 mg, 82%) ; <sup>1</sup>H NMR (500 MHz, CDCl<sub>3</sub>) δ 7.34 (t, *J*=1.5 Hz, 1H), 7.27 (t, *J*=1.0 Hz, 1H), 6.33 (d, *J*=1.0, 1H), 4.64 (t, *J*=6.0 Hz, 1H), 1.72-1.69 (m, 1H), 1.68-1.57 (m, 1H), 1.34-1.23 (m, 4H), 0.90-0.87 (m, 12H), 0.05 (s, 3H), 0.04 (s, 3H); <sup>13</sup>C NMR (125 MHz, CDCl<sub>3</sub>) δ 142.7, 138.6, 130.1, 108.8, 67.7, 39.2, 27.5, 25.8, 25.6, 18.2, 14.1, –4.7, –4.9; IR (neat, cm<sup>-1</sup>) 2956, 2858, 1468, 1361, 1256, 1085; HRMS (ES<sup>+</sup>) *m/z* 269.1934, [(M+H)<sup>+</sup>; calcd for C<sub>15</sub>H<sub>29</sub>O<sub>2</sub>Si: 269.1937].

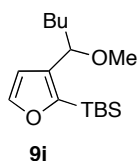

**9i** was prepared in an analogous method as **9a**. Isolated yield: 85%; <sup>1</sup>H NMR (500 MHz, CDCl<sub>3</sub>) δ 7.59 (d, *J*=1.5 Hz, 1H), 6.40 (d, *J*=1.5 Hz, 1H), 4.23 (dd, *J*=7.5, 5.5 Hz, 1H), 3.17 (s, 3H), 1.82-1.78 (m, 1H), 1.59-1.52 (m, 1H), 1.43-1.39 (m, 1H), 1.35-1.24 (m, 3H), 0.93 (s, 9H), 0.88 (t, *J* = 7.0 Hz, 3H), 0.28 (s, 6H); <sup>13</sup>C NMR (125 MHz, CDCl<sub>3</sub>) δ 154.7, 146.8, 138.1, 108.3, 75.6, 56.2, 37.4, 28.4, 26.7, 22.8, 17.6, 14.2, –4.9, –4.95; IR (neat, cm<sup>-1</sup>) 2955, 2859, 1467, 1362, 1251, 1097; HRMS (ES<sup>+</sup>) *m/z* 305.1909, [(M+Na)<sup>+</sup>; calcd for C<sub>16</sub>H<sub>30</sub>NaO<sub>2</sub>Si: 305.1913].



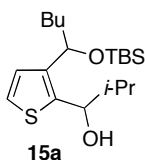

**General procedure for the three-component coupling reactions of thiophenes:**

**Preparation of 15a from 2b in one pot:** Compound **2b** (100 mg, 0.44 mmol) in THF (3 mL) was cooled to  $-78$  °C. To this solution was added *n*-BuLi (0.30 mL, 1.6 M in hexanes, 0.49 mmol) dropwise *via* syringe. The mixture was stirred at  $-78$  °C for 30 min before a solution of isobutyraldehyde (47.6 mg, 0.66 mmol) in DMPU/THF (1 mL/1 mL) was added quickly at  $-78$  °C. The reaction mixture was slowly warmed to rt for 3h. The reaction was quenched with a saturated aqueous solution of  $\text{NH}_4\text{Cl}$ . The mixture was extracted with  $\text{Et}_2\text{O}$ . Combined organic layers were washed with  $\text{NaHSO}_4$  (1.0 N) and brine. After drying with anhydrous  $\text{MgSO}_4$  and evaporation of the solvent, the residue was purified by flash chromatography (Hexane:EtOAc = 100:1) to give a 1:0.96 diastereomeric mixture of **15a** (88 mg, 56%);  $^1\text{H}$  NMR (300 MHz,  $\text{CDCl}_3$ )  $\delta$  7.17 (d,  $J=5.1$  Hz, 1H), 7.15 (d,  $J= 5.1\text{Hz}$ , 1H), 7.01 (d,  $J=5.1$  Hz, 1H), 6.99 (d,  $J= 5.1\text{Hz}$ , 1H), 4.88-4.78 (m, 2H), 4.66-4.59 (m, 2H), 2.08-1.93 (m, 4H), 1.77-1.55 (m, 4H), 1.35-1.21 (m, 8H), 1.15 (d,  $J= 6.3\text{Hz}$ , 3H), 1.13 (d,  $J=6.3$  Hz, 3H), 0.9-0.7 (m, 30H), 0.06 (s, 3H), 0.05 (s, 3H),  $-0.10$  (s, 3H),  $-0.13$  (s, 3H);  $^{13}\text{C}$  NMR (75 MHz,  $\text{CDCl}_3$ )  $\delta$  144.1, 143.5, 140.6, 140.2, 127.5, 127.3, 123.4, 123.2, 73.4 (2C), 70.1, 69.2, 40.3, 39.8 (2C), 36.6, 36.1, 28.2, 28.0, 25.8, 25.7, 22.6, 22.5, 19.9, 19.7, 19.2, 18.8, 18.2, 18.1, 14.1,  $-4.6$ ,  $-4.8$ ,  $-4.9$ ,  $-5.0$ ; IR (neat,  $\text{cm}^{-1}$ ) 3462, 2986, 2857, 1471, 1387, 1255, 1082; (HRMS)  $m/z$  379.2098 [ $(\text{M}+\text{Na})^+$ ;  $\text{C}_{19}\text{H}_{36}\text{NaO}_2\text{SSi}$ : calcd for: 379.2103].

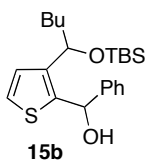

**15b** was prepared in an analogous method as **15a**. Isolated yield: 79% (dr 1:0.88);  $^1\text{H}$  NMR (300 MHz,  $\text{CDCl}_3$ )  $\delta$  7.42-7.21 (m, 10H), 7.06 (d,  $J= 5.4$  Hz, 1H), 7.03 (d,  $J= 5.1$  Hz, 1H), 6.91 (d,  $J= 5.4$  Hz, 1H), 6.90 (d,  $J= 5.1$  Hz, 1H) 6.10 (s, 1H), 6.03 (s, 1H), 4.75-4.70 (m, 2H), 3.15 (s, 1H), 2.99 (s, 1H), 1.74-1.49 (m, 4H) 1.28-1.09 (m, 8H), 0.86-0.79 (m, 21H), 0.73 (t,  $J= 6.6$  Hz, 3H)  $-0.02$  (s, 3H),  $-0.09$  (s, 3H),  $-0.16$  (s, 3H),  $-0.24$  (s, 3H);  $^{13}\text{C}$  NMR (75 MHz,  $\text{CDCl}_3$ )  $\delta$  143.3, 142.8, 142.7, 142.5, 141.4, 140.5, 128.4, 128.3, 128.2, 128.0, 127.9, 127.7, 126.7, 126.6, 125.9, 123.5, 70.8, 70.6, 70.2, 70.0, 39.4, 39.0, 30.3, 28.1, 28.0, 25.8, 22.5, 22.4, 18.2, 18.1, 14.1, 14.0,  $-4.8$ ,  $-4.9$ ,  $-5.0$ ,  $-5.1$ ; IR (neat,  $\text{cm}^{-1}$ ) 3396, 2955, 2856, 1462, 1360, 1250, 1079; HRMS ( $\text{ES}^+$ )  $m/z$  413.1987 [ $(\text{M}+\text{Na})^+$ ; calcd for  $\text{C}_{22}\text{H}_{34}\text{NaOSSi}$ : 413.1946].

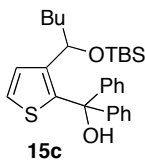

**15c** was prepared in an analogous method as **15a**. Isolated yield: 87% ;  $^1\text{H}$  NMR (300 MHz,  $\text{CDCl}_3$ )  $\delta$  7.40-7.28 (m, 10H), 7.07 (d,  $J= 5.1$  Hz, 1H), 6.91 (d,  $J= 5.1$  Hz, 1H), 6.06 (s, 1H), 4.78 (t,  $J= 6.9$  Hz, 1H), 1.59-1.37 (m, 2H), 1.10-1.04 (m, 4H), 0.89 (s, 9H), 0.78 (t,  $J= 6.9$  Hz, 3H), 0.01 (s, 3H),  $-0.12$  (s, 3H);  $^{13}\text{C}$  NMR (75 MHz,  $\text{CDCl}_3$ )  $\delta$  148.0, 147.9, 146.5, 141.1, 129.7, 128.1, 127.7, 127.6, 127.5, 127.4, 127.3, 122.7, 79.4, 72.6, 38.1, 28.1 25.8, 22.4, 18.2, 14.0,  $-4.8$ ,  $-5.0$ ; IR (neat,  $\text{cm}^{-1}$ ) 3341, 2954, 2856, 1471, 1360, 1254, 1108; HRMS ( $\text{ES}^+$ )  $m/z$  467.2448 [ $(\text{M}+\text{H})^+$ ; calcd for  $\text{C}_{28}\text{H}_{39}\text{O}_2\text{SSi}$ : 467.2440].

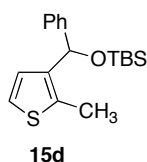

**15d** was prepared in an analogous method as **15a**. Isolated yield: 48%.  $^1\text{H}$ ,  $^{13}\text{C}$ , IR, Mass data were matched with previously published results: *Org. Lett.*, **2007**, *47*, 7082.

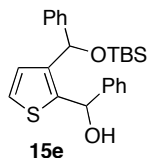

**15e** was prepared in an analogous method as **15a**. Isolated yield: 77% (dr 1:0.84);  $^1\text{H}$  NMR (300 MHz,  $\text{CDCl}_3$ )  $\delta$  7.54-7.34 (m, 23H), 7.14 (d,  $J= 5.1$  Hz, 1H), 6.35 (d,  $J= 3.6$  Hz, 1H), 6.13 (s, 1H), 6.10 (s, 1H) 6.03 (d,  $J= 2.7$  Hz, 1H), 3.36 (d,  $J= 2.7$  Hz, 1H), 2.57 (d,  $J= 3.6$  Hz, 1H), 1.05 (s, 9H), 1.04 (s, 9H), 0.17 (s, 3H), 0.16 (s, 3H), 0.11 (s, 3H), 0.08 (s, 3H);  $^{13}\text{C}$  NMR (75 MHz,  $\text{CDCl}_3$ )  $\delta$  144.3, 143.5, 142.8, 142.3, 142.2, 142.1, 142.0, 128.5 (2C), 128.4, 128.3, 128.2, 127.9 (2C), 127.8, 127.2, 127.1, 126.6, 126.4, 126.0, 125.8 (2C), 124.2, 123.9, 71.8, 71.5, 69.9, 69.4, 25.84, 25.81, 18.3 (2C),  $-4.8$ ,  $-4.9$ ,  $-4.96$ ,  $-5.0$ ; IR (neat,  $\text{cm}^{-1}$ ) 3414, 3029, 2955, 2884, 1472, 1361, 1256, 1066; HRMS ( $\text{ES}^+$ )  $m/z$  393.1711, [(M-OH) $^+$ ]; calcd for  $\text{C}_{24}\text{H}_{29}\text{OSSi}$ : 393.1708].

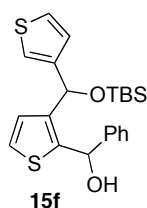

**15f** was prepared in an analogous method as **15a**. Isolated yield: 76% (dr 1:0.7);  $^1\text{H}$  NMR (300 MHz,  $\text{CDCl}_3$ )  $\delta$  7.34-6.79 (m, 20H), 6.16-5.87 (m, 4H), 3.24-2.48 (m, 2H), 0.98 (s, 18H), 0.03-0.07 (m, 12H);  $^{13}\text{C}$  NMR (75 MHz,  $\text{CDCl}_3$ )  $\delta$  145.9, 145.1, 143.9, 142.8, 142.3, 142.2, 141.4, 141.3, 128.4, 128.3, 128.2, 128.0, 127.9, 127.8, 126.6, 126.4, 126.2, 126.0, 125.9, 124.2, 123.9

(2C), 120.7, 120.6, 70.0, 69.4, 69.2, 68.4, 25.9, 25.8, 18.3, 18.2, -4.8, -4.9, -5.0, -5.1; IR (neat,  $\text{cm}^{-1}$ ) 3414, 3065, 2954, 1472, 1255, 1069; HRMS ( $\text{ES}^+$ )  $m/z$  399.1288,  $[(\text{M}-\text{OH})^+]$ ; calcd for  $\text{C}_{22}\text{H}_{27}\text{OS}_2\text{Si}$ : 399.1273].

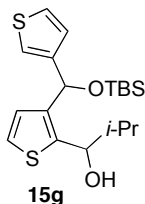

**15g** was prepared in an analogous method as **15a**. Isolated yield: 76% (dr 1:0.9);  $^1\text{H}$  NMR (300 MHz,  $\text{CDCl}_3$ )  $\delta$  7.25-7.22 (m, 2H), 7.19 (d,  $J= 5.1$  Hz, 2H), 7.14-7.13 (m, 1H), 7.10-7.08 (m, 2H), 7.04 (d,  $J= 5.1$  Hz, 1H), 6.97 (dd,  $J= 5.1$  Hz, 1.5 Hz, 1H), 6.93 (dd,  $J= 5.1$  Hz, 1.2 Hz, 1H), 6.04 (s, 1H), 6.01 (s, 1H), 4.70 (dd,  $J= 8.1$  Hz, 3.9 Hz, 1H), 4.61 (dd,  $J= 8.7$  Hz, 3.6 Hz, 1H), 2.05-1.98 (m, 4H), 1.08 (d,  $J= 6.6$  Hz, 3H), 1.06 (d,  $J= 6.6$  Hz, 3H), 0.94 (s, 9H), 0.92 (s, 9H), 0.77 (d,  $J= 6.6$  Hz, 3H), 0.75 (d,  $J= 6.6$  Hz, 3H), 0.09 (s, 3H), 0.08 (s, 3H), 0.01 (s, 3H), -0.01 (s, 3H);  $^{13}\text{C}$  NMR (75 MHz,  $\text{CDCl}_3$ )  $\delta$  146.23, 146.2, 142.5, 142.4, 141.9, 141.6, 127.9, 127.5, 126.4, 126.3, 125.9, 125.8, 123.6, 123.55, 120.8, 120.3, 73.3, 73.1, 68.7, 68.0, 36.1, 35.6, 25.8 (2C), 19.7, 19.65, 19.1, 18.7, 18.2 (2C), -4.8 (2C), -4.9 (2C); IR (neat,  $\text{cm}^{-1}$ ) 3457, 2958, 2857, 1472, 1362, 1255, 1068; HRMS ( $\text{ES}^+$ )  $m/z$  365.1428,  $[(\text{M}-\text{OH})^+]$ ; calcd for  $\text{C}_{19}\text{H}_{29}\text{OS}_2\text{Si}$ : 365.1429].

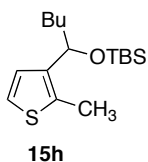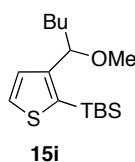

**15h** and **15i** were prepared in an analogous method as **15a**. Isolated yield: 45% for **15h**, 41% for **15i**; **15h**:  $^1\text{H}$  NMR (300 MHz,  $\text{CDCl}_3$ )  $\delta$  6.96-6.95 (m, 2H), 4.68 (dd,  $J= 7.5$  Hz, 5.4 Hz, 1H),

2.38 (s, 3H), 1.76-1.15 (m, 6H), 0.90-0.84 (m, 12H), 0.001 (s, 3H), -0.16 (s, 3H);  $^{13}\text{C}$  NMR (75 MHz,  $\text{CDCl}_3$ )  $\delta$  142.0, 131.8, 127.2, 120.9, 69.5, 39.3, 27.9, 25.9, 22.6, 18.2, 14.1, 13.0, -4.9, -5.2; IR (neat,  $\text{cm}^{-1}$ ) 2955, 2857, 1464, 1361, 1250, 1098; HRMS ( $\text{ES}^+$ )  $m/z$  299.1861,  $[(\text{M}+\text{H})^+]$ ; calcd for  $\text{C}_{16}\text{H}_{31}\text{OSSi}$ : 299.1865]. **15i**:  $^1\text{H}$  NMR (300 MHz,  $\text{CDCl}_3$ )  $\delta$  7.55 (d,  $J=4.8$  Hz, 1H), 7.24 (d,  $J=4.8$  Hz, 1H), 4.36 (dd,  $J=9.0$  Hz, 2.4 Hz, 1H), 3.21 (s, 3H), 1.83-1.76 (m, 1H), 1.75-1.52 (m, 2H), 1.37-1.25 (m, 3H), 0.96 (s, 9H), 0.92 (t,  $J=4.5$  Hz, 3H), 0.38 (s, 3H), 0.37 (s, 3H);  $^{13}\text{C}$  NMR (75 MHz,  $\text{CDCl}_3$ )  $\delta$  152.5, 132.0, 130.4, 127.6, 79.5, 56.4, 38.3, 28.7, 26.8, 22.7, 17.6, 14.1, -3.0, -3.1; IR (neat,  $\text{cm}^{-1}$ ) 2955, 2857, 1464, 1361, 1250, 1098; HRMS ( $\text{ES}^+$ )  $m/z$  299.1861,  $[(\text{M}+\text{H})^+]$ ;  $\text{C}_{16}\text{H}_{31}\text{OSSi}$ : calcd for : 299.1865].

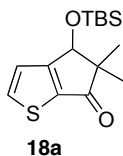

#### General procedure for the reaction with enolized ester:

**Preparation of 18a from 2b in one pot:** Compound **2b** (100 mg, 0.44 mmol) in THF (2 mL) was cooled to  $-78$  °C. In another flask the ester (61.5 mg, 0.48 mmol) in THF (2 mL) was cooled to  $-78$  °C and was treated with freshly prepared LDA (1.1 eq). The mixture was stirred at  $-78$  °C for 1 h. Then, the linchpin **2b** was added via cannula to the flask containing ester enolate solution. The reaction was stirred at  $-78$  °C for 25 min. DMPU (2 mL) was added quickly to the reaction mixture. The reaction was allowed warm to room temperature overnight and then quenched with saturated solution of  $\text{NH}_4\text{Cl}$ . The mixture was extracted with  $\text{Et}_2\text{O}$ . The combined organic layers were washed with  $\text{NaHSO}_4$  (1.0 N) and brine. After drying with anhydrous  $\text{MgSO}_4$  and evaporation of the solvent, the residue was purified by flash chromatography (Hexane:EtOAc = 100:1) to give **18a** (90 mg, 69%); mp: 96-99 °C,  $^1\text{H}$  NMR (300 MHz,  $\text{CDCl}_3$ )

$\delta$  7.91 (d,  $J= 4.8$  Hz, 1H), 7.10 (d,  $J= 4.8$  Hz, 1H), 4.85 (s, 1H), 1.29 (s, 3H), 1.17 (s, 3H), 0.96 (s, 9H), 0.24 (s, 3H), 0.20 (s, 3H);  $^{13}\text{C}$  NMR (75 MHz,  $\text{CDCl}_3$ )  $\delta$  199.4, 166.8, 140.5, 136.0, 123.4, 75.6, 56.9, 25.7, 23.3, 21.5, 18.2,  $-4.46$ ,  $-5.0$ ; IR (neat,  $\text{cm}^{-1}$ ) 2955, 2857, 1689, 1463, 1258, 1108; HRMS ( $\text{ES}^+$ )  $m/z$  297.1350,  $[(\text{M}+\text{H})^+]$ ; calcd for  $\text{C}_{25}\text{H}_{25}\text{O}_2\text{SSi}$ : 297.1345].

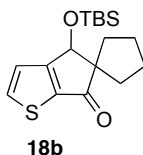

**18b** was prepared in an analogous method as **18a**. Isolated yield: 88%;  $^1\text{H}$  NMR (300 MHz,  $\text{CDCl}_3$ )  $\delta$  7.87 (d,  $J= 4.8$  Hz, 1H), 7.09 (d,  $J= 4.8$  Hz, 1H), 4.89 (s, 1H), 2.23-2.10 (m, 2H), 1.89-1.65 (m, 6H), 0.94 (s, 9H), 0.23 (s, 3H), 0.19 (s, 3H);  $^{13}\text{C}$  NMR (75 MHz,  $\text{CDCl}_3$ )  $\delta$  199.5, 167.0, 140.5, 139.9, 123.3, 75.4, 67.8, 36.7, 31.9, 26.8, 26.1, 25.7, 18.0,  $-4.1$ ,  $-4.5$ ; IR (neat,  $\text{cm}^{-1}$ ) 2930, 2857, 1705, 1462, 1254, 1078; HRMS ( $\text{ES}^+$ )  $m/z$  323.1509,  $[(\text{M}+\text{H})^+]$ ; calcd for  $\text{C}_{17}\text{H}_{27}\text{OSSi}$ : 323.1501].

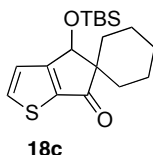

**18c** was prepared in an analogous method as **18a**. Isolated yield: 73%;  $^1\text{H}$  NMR (300 MHz,  $\text{CDCl}_3$ )  $\delta$  7.86 (d,  $J= 4.8$  Hz, 1H), 7.10 (d,  $J= 4.8$  Hz, 1H), 4.88 (s, 1H), 1.87-1.44 (m, 10H), 0.93 (s, 9H), 0.23 (s, 3H), 0.20 (s, 3H);  $^{13}\text{C}$  NMR (75 MHz,  $\text{CDCl}_3$ )  $\delta$  199.9, 165.9, 140.5, 139.5, 123.8, 74.4, 59.9, 33.9, 28.2, 25.8, 25.3, 22.8, 21.8, 18.1,  $-3.7$ ,  $-4.2$ ; IR (neat,  $\text{cm}^{-1}$ ) 2928, 2855, 1705, 1462, 1256, 1083; HRMS ( $\text{ES}^+$ )  $m/z$  337.1655,  $[(\text{M}+\text{H})^+]$ ; calcd for  $\text{C}_{18}\text{H}_{29}\text{O}_2\text{SSi}$ : 337.1658].

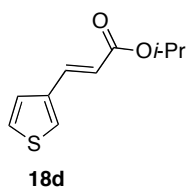

**18d** was prepared in an analogous method as **18a**. Isolated yield: 65%;  $^1\text{H}$  NMR (300 MHz,  $\text{CDCl}_3$ )  $\delta$  7.67 (d,  $J= 15.9$  Hz, 1H), 7.50 (d,  $J= 0.9$  Hz, 1H), 7.34-7.29 (m, 2H), 6.26 (d,  $J= 15.9$  Hz, 1H), 5.17-5.12 (septet,  $J= 5.6$  Hz, 1H), 1.32 (d,  $J= 6.0$  Hz, 6H);  $^{13}\text{C}$  NMR (75 MHz,  $\text{CDCl}_3$ )  $\delta$  166.8, 137.8, 137.6, 127.8, 126.9, 125.1, 118.4, 67.7, 21.9; IR (neat,  $\text{cm}^{-1}$ ) 3090, 2979, 1707, 1634, 1278, 1173, 1109; HRMS ( $\text{ES}^+$ )  $m/z$  197.0644,  $[(\text{M}+\text{H})^+]$ ; calcd for  $\text{C}_{10}\text{H}_{13}\text{O}_2\text{S}$ : 197.0636].

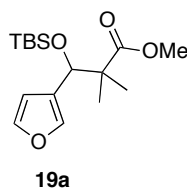

**19a:** To a solution of DIPA (67.8 mg, 0.68 mmol) in  $\text{Et}_2\text{O}$  (1 mL) at  $-15$   $^\circ\text{C}$  was added *n*-BuLi (0.32 mL, 2.1 M in hexanes, 0.68 mmol) dropwise *via* syringe. After the addition was complete, the reaction mixture was stirred for 20 min, and then cooled to  $-78$   $^\circ\text{C}$ . To this solution was slowly added the ester (68.6 mg, 0.67 mmol) in  $\text{Et}_2\text{O}$  (1 mL). The resulting solution was stirred for 1 h at  $-78$   $^\circ\text{C}$  before the linchpin **2a** (117 mg, 0.56 mmol) in  $\text{Et}_2\text{O}$  (2 mL) was added *via* cannula to the reaction mixture. After 30 min at  $-78$   $^\circ\text{C}$ , HMPA (2 mL) was quickly added to the reaction mixture, which was then allowed to warm to room temperature overnight. The reaction was quenched with a saturated aqueous solution of  $\text{NH}_4\text{Cl}$  and extracted with  $\text{Et}_2\text{O}$ . The combined organic layers were washed with brine, dried over anhydrous  $\text{MgSO}_4$ , concentrated *in vacuo*. The residue was purified by flash chromatography (Hexane: $\text{Et}_2\text{O}$  = 40:1) to give **19a** (90.7 mg, 52%);  $^1\text{H}$  NMR (500 MHz,  $\text{CDCl}_3$ )  $\delta$  7.31 (t,  $J=1.5$  Hz, 1H), 7.25 (s, 1H), 6.31 (d,

$J=1.0$  Hz, 1H), 4.93 (s, 1H), 3.65 (s, 3H), 1.18 (s, 3H), 0.99 (s, 3H), 0.85 (s, 9H),  $-0.01$  (s, 3H),  $-0.21$  (s, 3H);  $^{13}\text{C}$  NMR (125 MHz,  $\text{CDCl}_3$ )  $\delta$  177.1, 142.2, 140.0, 125.6, 110.4, 72.3, 51.6, 48.8, 25.6, 21.0, 19.7, 18.0,  $-4.6$ ,  $-5.6$ ; IR (neat,  $\text{cm}^{-1}$ ) 2953, 2858, 1729, 1472, 1257, 1191, 1090; HRMS ( $\text{ES}^+$ )  $m/z$  335.1664,  $[(\text{M}+\text{Na})^+]$ ; calcd for  $\text{C}_{16}\text{H}_{28}\text{NaO}_4\text{Si}$ : 335.1655].

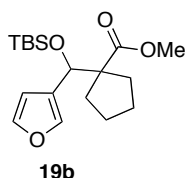

**19b** was made in a similar method as **19a** except using DMPU:THF = (3 mL: 3 mL) as the solvent system to trigger the Brook Rearrangement. Isolated yield: 57%;  $^1\text{H}$  NMR (500 MHz,  $\text{CDCl}_3$ )  $\delta$  7.29 (t,  $J=1.5$  Hz, 1H), 7.23 (br, 1H), 6.31 (d,  $J=1.5$  Hz, 1H), 5.06 (s, 1H), 3.62 (s, 3H), 2.04-2.00 (m, 1H), 1.93-1.86 (m, 2H), 1.78-1.73 (m, 1H), 1.54-1.48 (m, 4H), 0.86 (s, 9H), 0.03 (s, 3H),  $-0.19$  (s, 3H);  $^{13}\text{C}$  NMR (125 MHz,  $\text{CDCl}_3$ )  $\delta$  176.9, 142.3, 139.7, 126.6, 110.0, 70.6, 61.0, 51.6, 32.7, 30.2, 25.7, 25.6 (2C), 18.0,  $-4.6$ ,  $-5.4$ ; IR (neat,  $\text{cm}^{-1}$ ) 2954, 2859, 1738, 1468, 1255, 1195, 1091; HRMS ( $\text{ES}^+$ )  $m/z$  361.1811,  $[(\text{M}+\text{Na})^+]$ ; calcd for  $\text{C}_{18}\text{H}_{30}\text{NaO}_4\text{Si}$ : 361.1811].

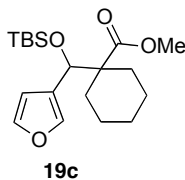

**19c**: To a solution of (cyclohexylidene(methoxy)methoxy)trimethylsilane<sup>12</sup> (146 mg, 0.68 mol) in  $\text{Et}_2\text{O}$  (1 mL) was added MeLi (0.40 mL, 1.6 M in  $\text{Et}_2\text{O}$ , 0.64 mol) at 0 °C. After the addition was complete, the reaction mixture was allowed to stir for 1 h at rt. After being cooled to  $-78$  °C, **2a** (104.9 mg, 0.50 mol) in  $\text{Et}_2\text{O}$  (1 mL) was slowly added and stirred at  $-78$  °C for 30 min.

<sup>12</sup> Hatano, M.; Takagi, E.; Ishihara, K. *Org. Lett.* **2007**, *9*, 4527.



HMPA (2 mL) was added quickly to the reaction mixture. The reaction was then allowed to warm to room temperature overnight. The reaction was quenched with a saturated aqueous solution of  $\text{NH}_4\text{Cl}$  and extracted with  $\text{Et}_2\text{O}$ . The combined organic layers were washed with brine, dried over anhydrous  $\text{MgSO}_4$  and concentrated *in vacuo*. The residue was purified by flash chromatography (Hexane: $\text{Et}_2\text{O}$  = 40:1) to give **19c** (91.8 mg, 52%);  $^1\text{H}$  NMR (500 MHz,  $\text{CDCl}_3$ )  $\delta$  7.31 (t,  $J=1.5$  Hz, 1H), 7.21 (t,  $J=1.0$  Hz, 1H), 6.28 (d,  $J=1.0$  Hz, 1H), 4.67 (s, 1H), 3.64 (s, 3H), 2.11-2.09 (m, 1H), 1.97-1.95 (m, 1H), 1.63-1.58 (m, 3H), 1.38-1.23 (m, 4H), 1.07-0.99 (m, 1H), 0.87 (s, 9H), 0.00 (s, 3H),  $-0.23$  (s, 3H);  $^{13}\text{C}$  NMR (125 MHz,  $\text{CDCl}_3$ )  $\delta$  175.5, 142.1, 140.0, 125.8, 110.4, 73.4, 54.2, 51.3, 29.6, 29.0, 25.9, 25.7, 23.4, 23.3, 18.0,  $-4.7$   $-5.5$ ; IR (neat,  $\text{cm}^{-1}$ ) 2932, 2858, 1739, 1456, 1255, 1132, 1092; HRMS ( $\text{ES}^+$ )  $m/z$  375.1967,  $[(\text{M}+\text{Na})^+]$ ; calcd for  $\text{C}_{19}\text{H}_{32}\text{NaO}_4\text{Si}$ : 375.1968].
